# Supplementary material for: Transcriptomic Analysis of Metarhizium anisopliae-Induced Immune-Related Long Non-Coding RNAs in Polymorphic Worker Castes of Solenopsis invicta
Source: MDPI journal article supplement (doi:10.3390/ijms241813983), 2023-09-12
Supplement: s1 [file s1]

**Table S13.** Top 20 GO categories enriched by *trans*-regulatory target genes of lncRNAs in M48hD vs. M48hX.

| GO term                                       | Number of enriched genes |
|-----------------------------------------------|--------------------------|
| Single-organism process                       | 223                      |
| Cellular process                              | 217                      |
| Binding                                       | 167                      |
| Biological regulation                         | 158                      |
| Regulation of biological process              | 149                      |
| Cell part                                     | 149                      |
| Cell                                          | 149                      |
| Membrane                                      | 136                      |
| Metabolic process                             | 133                      |
| Response to stimulus                          | 132                      |
| Localization                                  | 119                      |
| Multicellular organismal process              | 117                      |
| Signaling                                     | 112                      |
| Catalytic activity                            | 106                      |
| Membrane part                                 | 104                      |
| Developmental process                         | 99                       |
| Organelle                                     | 90                       |
| Cellular component organization or biogenesis | 75                       |
| Macromolecular complex                        | 47                       |
| Positive regulation of the biological process | 45                       |

Note: M48hD denotes *M. anisopliae*-infected Major worker ants  
M48hX denotes *M. anisopliae*-infected Minor worker ants
