# Supplementary material for: Transcriptomic Analysis of Metarhizium anisopliae-Induced Immune-Related Long Non-Coding RNAs in Polymorphic Worker Castes of Solenopsis invicta
Source: MDPI journal article supplement (doi:10.3390/ijms241813983), 2023-09-12
Supplement: s1 [file s1]

**Table S10.** Top 20 GO categories enriched by *trans*-regulatory target genes of lncRNAs in M0hD vs. M0hX.

| GO term                                       | Number of enriched genes |
|-----------------------------------------------|--------------------------|
| Single-organism process                       | 255                      |
| Cellular process                              | 250                      |
| Binding                                       | 195                      |
| Cell                                          | 183                      |
| Cell part                                     | 182                      |
| Biological regulation                         | 180                      |
| Regulation of biological process              | 170                      |
| Metabolic process                             | 157                      |
| Membrane                                      | 152                      |
| Localization                                  | 143                      |
| Response to stimulus                          | 139                      |
| Multicellular organismal process              | 137                      |
| Developmental process                         | 120                      |
| Signaling                                     | 118                      |
| Membrane part                                 | 117                      |
| Organelle                                     | 115                      |
| Catalytic activity                            | 113                      |
| Cellular component organization or biogenesis | 98                       |
| Macromolecular complex                        | 68                       |
| Organelle part                                | 53                       |

Note: M0hD denotes Major worker ants (uninfected)  
M0hX denotes Minor worker ants (uninfected)
