# Supplementary material for: Transcriptomic Analysis of Metarhizium anisopliae-Induced Immune-Related Long Non-Coding RNAs in Polymorphic Worker Castes of Solenopsis invicta
Source: MDPI journal article supplement (doi:10.3390/ijms241813983), 2023-09-12
Supplement: s1 [file s1]

**Table S6.** Top 20 GO categories enriched by *cis*-regulatory target genes of lncRNAs in.  
M0hD vs. M0hX.

| GO term                                       | Number of enriched genes |
|-----------------------------------------------|--------------------------|
| Single-organism process                       | 199                      |
| Cellular process                              | 196                      |
| Binding                                       | 156                      |
| Cell part                                     | 154                      |
| Cell                                          | 154                      |
| Metabolic process                             | 150                      |
| Organelle                                     | 129                      |
| Biological regulation                         | 127                      |
| Catalytic activity                            | 123                      |
| Regulation of biological process              | 121                      |
| Developmental process                         | 110                      |
| Multicellular organismal process              | 96                       |
| Response to stimulus                          | 96                       |
| Localization                                  | 84                       |
| Membrane                                      | 81                       |
| Cellular component organization or biogenesis | 80                       |
| Signaling                                     | 72                       |
| Organelle part                                | 68                       |
| macromolecular complex                        | 56                       |
| membrane part                                 | 48                       |

Note: M0hD denotes Major worker ants (uninfected)  
M0hX denotes Minor worker ants (uninfected)
