# Supplementary material for: Transcriptomic Analysis of Metarhizium anisopliae-Induced Immune-Related Long Non-Coding RNAs in Polymorphic Worker Castes of Solenopsis invicta
Source: MDPI journal article supplement (doi:10.3390/ijms241813983), 2023-09-12
Supplement: s1 [file s1]

**Table S15.** Primers used in the study.

| Name             | Primer sequences (5' - 3') |
|------------------|----------------------------|
| XR_005576518.1_F | AAGGTACCACGCTGTTGTGT       |
| XR_005576518.1_R | AGTCAATGTCGCGCTATTCC       |
| XR_850623.3_F    | TCGTGACGTACTTCCTCAAGC      |
| XR_850623.3_R    | TGTCCTGCATTCTTCGCACA       |
| MSTRG.8382.1_F   | CTGACTGTTGCGGACATCCT       |
| MSTRG.8382.1_R   | AACGAGCGCAGCATAGGTTA       |
| MSTRG.4719.1_F   | G TTCCTCCGACCTCAACCAG      |
| MSTRG.4719.1_R   | ATTATTTTCGTCGCGGTGCG       |
| MSTRG.3903.1_F   | TGCCGAGTACAGATTCACTGG      |
| MSTRG.3903.1_R   | TGGTCTCATTGTGACTGGAAGA     |
| XR_851002.3_F    | TCCACGGTTAACGCTCAGTC       |
| XR_851002.3_R    | ACAAGCCGTGGTGTAGCTTT       |
| MSTRG.6675.16_F  | AGCAAAACAAACTGTTTAAGGGGA   |
| MSTRG.6675.16_R  | AGAGATGATTGGAGTAGGTCTGT    |
| XR_005576437.1_F | CGGCTCATCGCACAACATAG       |
| XR_005576437.1_R | TGCGACTGTAGCATCGACT        |
| RPL18_F          | TTTACGGCTCCTCGTCAAGC       |
| RPL18_R          | ACGCAATTCTCCCTTCCAGG       |
