# Supplementary material for: Transcriptomic Analysis of Metarhizium anisopliae-Induced Immune-Related Long Non-Coding RNAs in Polymorphic Worker Castes of Solenopsis invicta
Source: MDPI journal article supplement (doi:10.3390/ijms241813983), 2023-09-12
Supplement: s1 [file s1]

**Table S8.** Top 20 GO categories enriched by *cis*-regulatory target genes of lncRNAs in.  
M24hD vs. M24hX.

| GO term                                       | Number of enriched genes |
|-----------------------------------------------|--------------------------|
| Single-organism process                       | 88                       |
| Cellular process                              | 72                       |
| Metabolic process                             | 53                       |
| Response to stimulus                          | 52                       |
| Biological regulation                         | 49                       |
| Cell part                                     | 49                       |
| Cell                                          | 49                       |
| Catalytic activity                            | 48                       |
| Regulation of the biological process          | 47                       |
| Binding                                       | 46                       |
| Localization                                  | 39                       |
| Organelle                                     | 38                       |
| Multicellular organismal process              | 36                       |
| Developmental process                         | 36                       |
| Signaling                                     | 31                       |
| Membrane                                      | 31                       |
| Cellular component organization or biogenesis | 29                       |
| Membrane part                                 | 22                       |
| Positive regulation of the biological process | 21                       |
| Organelle part                                | 17                       |

Note: M24hD denotes *M. anisopliae*-infected Major worker ants  
M24hX denotes *M. anisopliae*-infected Minor worker ants
