# Supplementary material for: Transcriptomic Analysis of Metarhizium anisopliae-Induced Immune-Related Long Non-Coding RNAs in Polymorphic Worker Castes of Solenopsis invicta
Source: MDPI journal article supplement (doi:10.3390/ijms241813983), 2023-09-12
Supplement: s1 [file s1]

**Table S11.** Top 20 GO categories enriched by *trans*-regulatory target genes of lncRNAs in M6hD vs. M6hX.

| GO term                                       | Number of enriched genes |
|-----------------------------------------------|--------------------------|
| Single-organism process                       | 196                      |
| Cellular process                              | 191                      |
| Biological regulation                         | 140                      |
| Binding                                       | 139                      |
| Regulation of biological process              | 132                      |
| Cell                                          | 131                      |
| Cell part                                     | 130                      |
| Membrane                                      | 123                      |
| Localization                                  | 114                      |
| Response to stimulus                          | 111                      |
| Metabolic process                             | 111                      |
| Multicellular organismal process              | 109                      |
| Signaling                                     | 100                      |
| Membrane part                                 | 97                       |
| Developmental process                         | 90                       |
| Catalytic activity                            | 87                       |
| Organelle                                     | 72                       |
| Cellular component organization or biogenesis | 66                       |
| Macromolecular complex                        | 43                       |
| Molecular transducer activity                 | 42                       |

**Note:** M6hD denotes *M. anisopliae*-infected Major worker ants  
M6hX denotes *M. anisopliae*-infected Minor worker ants
