# Supplementary material for: Transcriptomic Analysis of Metarhizium anisopliae-Induced Immune-Related Long Non-Coding RNAs in Polymorphic Worker Castes of Solenopsis invicta
Source: MDPI journal article supplement (doi:10.3390/ijms241813983), 2023-09-12
Supplement: s1 [file s1]

**Table S9.** Top 20 GO categories enriched by *cis*-regulatory target genes of lncRNAs in M48hD vs. M48hX.

| GO term                                       | Number of enriched Genes |
|-----------------------------------------------|--------------------------|
| Single-organism process                       | 130                      |
| Cellular process                              | 124                      |
| Binding                                       | 94                       |
| Metabolic process                             | 92                       |
| Cell part                                     | 92                       |
| Cell                                          | 92                       |
| Organelle                                     | 81                       |
| Biological regulation                         | 80                       |
| Regulation of biological process              | 79                       |
| Catalytic activity                            | 78                       |
| Response to stimulus                          | 76                       |
| Localization                                  | 66                       |
| Developmental process                         | 66                       |
| Multicellular organismal process              | 65                       |
| Membrane                                      | 55                       |
| Cellular component organization or biogenesis | 53                       |
| Signaling                                     | 45                       |
| Membrane part                                 | 40                       |
| Organelle part                                | 37                       |
| Positive regulation of the biological process | 29                       |

Note: M48hD denotes *M. anisopliae*-infected Major worker ants  
M48hX denotes *M. anisopliae*-infected Minor worker ants
