# Supplementary material for: Transcriptomic Analysis of Metarhizium anisopliae-Induced Immune-Related Long Non-Coding RNAs in Polymorphic Worker Castes of Solenopsis invicta
Source: MDPI journal article supplement (doi:10.3390/ijms241813983), 2023-09-12
Supplement: s1 [file s1]

**Table S7.** Top 20 GO categories enriched by *cis*-regulatory target genes of lncRNAs in.  
M6hD vs. M6hX.

| GO term                                       | Number of enriched genes |
|-----------------------------------------------|--------------------------|
| Single-organism process                       | 149                      |
| Cellular process                              | 139                      |
| Cell part                                     | 103                      |
| Cell                                          | 103                      |
| Metabolic process                             | 99                       |
| Binding                                       | 93                       |
| Biological regulation                         | 91                       |
| Regulation of biological process              | 84                       |
| Response to stimulus                          | 81                       |
| Catalytic activity                            | 80                       |
| Organelle                                     | 80                       |
| Localization                                  | 79                       |
| Developmental process                         | 68                       |
| Multicellular organismal process              | 63                       |
| Membrane                                      | 63                       |
| Signaling                                     | 61                       |
| Cellular component organization or biogenesis | 51                       |
| Membrane part                                 | 47                       |
| Macromolecular complex                        | 38                       |
| Organelle part                                | 35                       |

Note: M6hD denotes *M. anisopliae*-infected Major worker ants  
M6hX denotes *M. anisopliae*-infected Minor worker ants
