# Supplementary material for: Transcriptomic Analysis of Metarhizium anisopliae-Induced Immune-Related Long Non-Coding RNAs in Polymorphic Worker Castes of Solenopsis invicta
Source: MDPI journal article supplement (doi:10.3390/ijms241813983), 2023-09-12
Supplement: s1 [file s1]

**Table S12.** Top 20 GO categories enriched by *trans*-regulatory target genes of lncRNAs in M24hD vs. M24hX.

| GO term                                       | Number of enriched genes |
|-----------------------------------------------|--------------------------|
| Single-organism process                       | 169                      |
| Cellular process                              | 163                      |
| Biological regulation                         | 119                      |
| Binding                                       | 118                      |
| Regulation of biological process              | 112                      |
| Cell                                          | 109                      |
| Membrane                                      | 108                      |
| Cell part                                     | 108                      |
| Localization                                  | 98                       |
| Metabolic process                             | 95                       |
| Response to stimulus                          | 92                       |
| Multicellular organismal process              | 85                       |
| Signaling                                     | 84                       |
| Membrane part                                 | 84                       |
| Catalytic activity                            | 75                       |
| Developmental process                         | 70                       |
| Organelle                                     | 57                       |
| Cellular component organization or biogenesis | 47                       |
| Molecular transducer activity                 | 35                       |
| Transporter activity                          | 35                       |

Note: M24hD denotes *M. anisopliae*-infected Major worker ants  
M24hX denotes *M. anisopliae*-infected Minor worker ants
