# Supplementary material for: Transcriptomic Analysis of Metarhizium anisopliae-Induced Immune-Related Long Non-Coding RNAs in Polymorphic Worker Castes of Solenopsis invicta
Source: Int J Mol Sci. 2023 Sep 12;24(18):13983. doi: 10.3390/ijms241813983 (PMC10531276; doi:10.3390/ijms241813983)
Supplement: Supplementary file 1 [file ijms-24-13983-s001.zip]

Archive with 19 entries (19 files):
- Figure S1 Percentage of mapped reads onto the regions of intergenic, exons, and introns..png
- Figure S2 LncRNA analysis pipeline..png
- Figure S3 Top 20 Kyoto Encyclopedia Genes and Genomes (KEGG) pathway enrichment analyses of target genes of cis-acting lncRNAs..PNG
- Figure S4 Top 20 Kyoto Encyclopedia Genes and Genomes (KEGG) pathway enrichment analyses of target genes of trans-acting lncRNAs..PNG
- Table S1 Statistics of Transcriptome Data.xlsx
- Table S10 Top 20 GO categories enriched by trans-regulatory target genes of lncRNAs in M0hD vs. M0hX..pdf
- Table S11 Top 20 GO categories enriched by trans-regulatory target genes of lncRNAs in M6hD vs. M6hX..pdf
- Table S12 Top 20 GO categories enriched by trans-regulatory target genes of lncRNAs in M24hD vs. M24hX..pdf
- Table S13 Top 20 GO categories enriched by trans-regulatory target genes of lncRNAs in M48hD vs. M48hX..pdf
- Table S14 Prediction of lncRNAs as the precursor of miRNAs in Solenopsis invicta..xlsx
- Table S15 Primers used in this study.pdf
- Table S2 List of Differentially expressed lncRNAs in uninfected (M0hD vs. M0hX) Solenopsis invicta workers..xlsx
- Table S3 List of Differentially expressed lncRNAs in Metarhizium anisopliae-infected Solenopsis invicta workers at M6hD vs. M6hX..xlsx
- Table S4 List of Differentially expressed lncRNAs in Metarhizium anisopliae-infected Solenopsis invicta workers at M24hD vs. M24hX..xlsx
- Table S5 List of Differentially expressed lncRNAs in Metarhizium anisopliae-infected Solenopsis invicta workers at M48hD vs. M48hX..xlsx
- Table S6 Top 20 GO categories enriched by cis-regulatory target genes of lncRNAs in M0hD vs. M0hX..pdf
- Table S7 Top 20 GO categories enriched by cis-regulatory target genes of lncRNAs in M6hD vs. M6hX..pdf
- Table S8 Top 20 GO categories enriched by cis-regulatory target genes of lncRNA in M24hD vs. M24hX..pdf
- Table S9 Top 20 GO categories enriched by cis-regulatory target genes of lncRNAs in M48hD vs. M48hX..pdf
