# Supplementary material for: Transcriptomic Analysis of Metarhizium anisopliae-Induced Immune-Related Long Non-Coding RNAs in Polymorphic Worker Castes of Solenopsis invicta
Source: Int J Mol Sci. 2023 Sep 12;24(18):13983. doi: 10.3390/ijms241813983 (PMC10531276; doi:10.3390/ijms241813983)
Supplement: Supplementary file 1 [file ijms-24-13983-s001.zip › Table S1 Statistics of Transcriptome Data.xlsx]

## Sheet: M_0hD-vs-M_0hX.filter
Table S1: Statistics of Transcriptome Data.
Sample	Raw Reads	Clean Reads (%)	Total Mapping Ratio (%)	Uniquely Mapped Ratio (%)
Major Worker Ants
M0hD1	80154168	80,055,260 (99.88%)	65,730,849 (83.79%)	64,004,358 (81.59%)
M0hD2	83905264	83,820,440 (99.90%)	39,282,539 (47.36%)	38,172,849 (46.02%)
M0hD3	81970272	81,860,648 (99.87%)	71,913,525 (89.92%)	69,881,776 (87.38%)
M6hD1	83731528	83,608,644 (99.85%)	72,336,279 (88.05%)	70,437,618 (85.74%)
M6hD2	83619058	83,347,718 (99.68%)	72,964,509 (93.72%)	71,095,613 (91.31%)
M6hD3	79801726	79,622,738 (99.78%)	71,221,575 (93.47%)	69,329,652 (90.98%)
M24hD1	84960860	84,840,738 (99.86%)	64,632,089 (77.89%)	62,739,290 (75.61%)
M24hD2	82592960	82,392,190 (99.76%)	74,134,571 (94.16%)	72,219,496 (91.73%)
M24hD3	97616676	97,385,930 (99.76%)	86,274,576 (94.10%)	84,074,016 (91.70%)
M48hD1	81652992	81,505,784 (99.82%)	51,645,681 (64.83%)	48,211,617 (60.52%)
M48hD2	92470030	92,257,486 (99.77%)	81,749,849 (92.84%)	79,613,775 (90.41%)
M48hD3	80391158	80,222,114 (99.79%)	70,343,080 (92.06%)	68,730,970 (89.95%)
Minor Worker Ants
M0hX1	82368628	82,259,798 (99.87%)	69,721,620 (86.51%)	67,678,365 (83.97%)
M0hX2	84635466	84,516,444 (99.86%)	67,995,792 (81.71%)	65,544,039 (78.76%)
M0hX3	79695196	79,597,360 (99.88%)	61,814,187 (78.88%)	59,868,752 (76.39%)
M6hX1	84163916	84,071,898 (99.89%)	47,306,268 (56.92%)	46,204,266 (55.59%)
M6hX2	90591422	90,423,232 (99.81%)	80,909,745 (92.56%)	78,665,099 (89.99%)
M6hX3	82887822	82,719,796 (99.80%)	53,607,887 (66.49%)	52,087,665 (64.60%)
M24hX1	85017224	84,924,724 (99.89%)	42,758,541 (50.82%)	41,551,093 (49.39%)
M24hX2	79737142	79,512,822 (99.72%)	54,564,385 (70.97%)	53,292,570 (69.32%)
M24hX3	82713768	82,480,182 (99.72%)	73,436,210 (92.32%)	71,438,871 (89.81%)
M48hX1	80006602	79,928,786 (99.90%)	38,739,857 (48.97%)	37,803,625 (47.79%)
M48hX2	89305828	89,074,986 (99.74%)	78,817,120 (92.90%)	76,837,090 (90.57%)
M48hX3	81243210	81,016,282 (99.72%)	64,863,646 (83.42%)	63,317,180 (81.43%)
	Note: M0hD = Uninfected Major workers; M0hX = Uninfected Minor workers.
	M6hD, M24hD and M48D = Infected Major workers at different time points; M6hX, M24hX and M48X = Infected Minor workers at different time points
