# Supplementary material for: Transcriptomic Analysis of Metarhizium anisopliae-Induced Immune-Related Long Non-Coding RNAs in Polymorphic Worker Castes of Solenopsis invicta
Source: Int J Mol Sci. 2023 Sep 12;24(18):13983. doi: 10.3390/ijms241813983 (PMC10531276; doi:10.3390/ijms241813983)
Supplement: Supplementary file 1 [file ijms-24-13983-s001.zip › Table S2 List of Differentially expressed lncRNAs in uninfected (M0hD vs. M0hX) Solenopsis invicta workers..xlsx]

## Sheet: M_0hD-vs-M_0hX.filter
Table S2: List of Differentially expressed lncRNAs in uninfected (M0hD vs. M0hX) Solenopsis invicta workers
id	M_0hD1	M_0hD2	M_0hD3	M_0hX1	M_0hX2	M_0hX3	M_0hD1_CPM	M_0hD2_CPM	M_0hD3_CPM	M_0hX1_CPM	M_0hX2_CPM	M_0hX3_CPM	M_0hD_mean	M_0hX_mean	log2(fc)	PValue	FDR
XR_005575300.1	405	88	338	1	18	6	190.71	72.75	148.25	0.46	8.45	3.11	137.237	4.00667	-5.0981	1.56058e-20	8.10566e-17
XR_005576089.1	5844	3346	7952	1471	1921	1735	2751.89	2766.14	3487.79	673.04	901.85	898.63	3001.94	824.507	-1.8643	1.29856e-19	3.37237e-16
XR_850623.3	13580	11978	14229	3879	2516	3965	6394.71	9902.23	6240.92	1774.8	1181.18	2053.65	7512.62	1669.88	-2.1696	4.25515e-14	7.36708e-11
MSTRG.11168.1	1287	594	978	236	195	295	606.04	491.06	428.96	107.98	91.55	152.79	508.687	117.44	-2.1149	3.16556e-13	4.11048e-10
XR_005575796.1	71226	25834	48652	14493	10739	10010	33539.7	21357	21339	6631.13	5041.63	5184.63	25411.9	5619.13	-2.1771	4.7673e-13	4.95228e-10
XR_850574.3	54	29	49	345	1857	220	25.43	23.97	21.49	157.85	871.8	113.95	23.63	381.2	4.0119	5.20383e-11	4.50478e-08
MSTRG.13037.1	321	225	595	1469	1728	1464	151.16	186.01	260.97	672.13	811.24	758.27	199.38	747.213	1.906	8.74341e-11	6.48761e-08
XR_005576221.1	11443	5808	11468	2328	2082	4290	5388.41	4801.48	5029.93	1065.15	977.43	2221.98	5073.27	1421.52	-1.8355	1.15345e-10	7.48879e-08
MSTRG.2235.2	377	137	586	59	29	95	177.53	113.26	257.02	26.99	13.61	49.2	182.603	29.9333	-2.6089	1.66011e-10	9.58066e-08
MSTRG.7475.2	3614	1773	4021	434	423	1256	1701.8	1465.74	1763.63	198.57	198.59	650.54	1643.72	349.233	-2.2347	1.96324e-10	1.01971e-07
XR_005574679.1	79	20	91	2	2	5	37.2	16.53	39.91	0.92	0.94	2.59	31.2133	1.48333	-4.3952	2.53526e-10	1.1971e-07
MSTRG.18138.1	1312	956	2360	5048	5560	5833	617.81	790.33	1035.11	2309.66	2610.25	3021.17	814.417	2647.03	1.7005	1.67693e-09	7.25831e-07
XR_005574158.1	14	18	33	194	358	104	6.59	14.88	14.47	88.76	168.07	53.87	11.98	103.567	3.1119	2.59365e-09	1.03626e-06
MSTRG.10559.3	184	1	188	1	1	0	86.64	0.83	82.46	0.46	0.47	0	56.6433	0.31	-7.5135	4.23798e-09	1.57229e-06
XR_005575087.1	47	19	76	306	420	179	22.13	15.71	33.33	140.01	197.18	92.71	23.7233	143.3	2.5947	1.05994e-08	3.6702e-06
MSTRG.19004.1	370	245	416	150	145	137	174.23	202.54	182.46	68.63	68.07	70.96	186.41	69.22	-1.4292	1.26322e-08	4.10072e-06
MSTRG.4719.1	3473	1988	4471	11588	14481	9225	1635.41	1643.48	1961	5301.98	6798.38	4778.04	1746.63	5626.13	1.6876	1.76703e-08	5.39881e-06
MSTRG.20.1	475	209	270	120	58	56	223.67	172.78	118.42	54.9	27.23	29	171.623	37.0433	-2.212	2.50768e-08	6.89225e-06
XR_005574470.1	20	62	54	0	4	0	9.42	51.26	23.68	0	1.88	0	28.12	0.626667	-5.4878	2.52123e-08	6.89225e-06
MSTRG.64.1	228	177	487	884	1331	1172	107.36	146.33	213.6	404.47	624.86	607.03	155.763	545.453	1.8081	2.68868e-08	6.8971e-06
MSTRG.4560.1	89	75	251	25	39	36	41.91	62	110.09	11.44	18.31	18.65	71.3333	16.1333	-2.1445	2.78858e-08	6.8971e-06
XR_005576517.1	10395	6657	8654	4417	3100	2927	4894.92	5503.35	3795.69	2020.96	1455.35	1516.02	4731.32	1664.11	-1.5075	3.0433e-08	7.18496e-06
XR_005574325.1	832	757	1944	3789	4466	4456	391.78	625.81	852.65	1733.62	2096.65	2307.96	623.413	2046.08	1.7146	3.20927e-08	7.24737e-06
MSTRG.1370.1	533	346	917	2322	2732	1646	250.99	286.04	402.2	1062.41	1282.59	852.54	313.077	1065.85	1.7674	3.72349e-08	8.05826e-06
XR_003269299.2	862	604	1636	378	562	496	405.91	499.33	717.56	172.95	263.84	256.9	540.933	231.23	-1.2261	3.8841e-08	8.06961e-06
MSTRG.15831.1	187	156	373	766	1212	790	88.06	128.97	163.6	350.48	569	409.18	126.877	442.887	1.8035	5.02224e-08	1.00329e-05
MSTRG.5281.15	627	458	1520	2863	3819	2910	295.25	378.63	666.68	1309.94	1792.9	1507.22	446.853	1536.69	1.7819	5.72666e-08	1.10164e-05
MSTRG.20408.1	0	54	0	0	0	0	0	44.64	0	0	0	0	14.88	0.001	-13.8611	6.13887e-08	1.13876e-05
MSTRG.914.1	92	38	73	11	17	10	43.32	31.41	32.02	5.03	7.98	5.18	35.5833	6.06333	-2.553	8.54937e-08	1.48586e-05
MSTRG.11994.100	0	0	0	77	44	17	0	0	0	35.23	20.66	8.81	0.001	21.5667	14.3965	8.58219e-08	1.48586e-05
MSTRG.18263.8	282	203	561	1210	1378	1067	132.79	167.82	246.06	553.62	646.93	552.65	182.223	584.4	1.6812	9.97945e-08	1.67204e-05
XR_005574960.1	10	2	12	47	463	42	4.71	1.65	5.26	21.5	217.36	21.75	3.87333	86.87	4.4872	1.05921e-07	1.71923e-05
XR_005575924.1	73	53	102	287	437	272	34.38	43.82	44.74	131.31	205.16	140.88	40.98	159.117	1.9571	1.19906e-07	1.88724e-05
MSTRG.14636.7	17	16	60	236	203	147	8.01	13.23	26.32	107.98	95.3	76.14	15.8533	93.14	2.5546	1.27975e-07	1.955e-05
MSTRG.13039.3	90	73	100	339	375	439	42.38	60.35	43.86	155.11	176.05	227.38	48.8633	186.18	1.9299	1.46429e-07	2.17301e-05
MSTRG.19934.21	2515	997	1732	487	233	775	1184.29	824.22	759.66	222.82	109.39	401.41	922.723	244.54	-1.9158	1.50948e-07	2.17785e-05
MSTRG.18840.33	3440	2830	5737	17156	15488	10657	1619.87	2339.56	2516.28	7849.56	7271.14	5519.74	2158.57	6880.15	1.6724	1.68539e-07	2.36592e-05
XR_005574582.1	203	160	282	59	29	94	95.59	132.27	123.69	26.99	13.61	48.69	117.183	29.7633	-1.9772	2.34051e-07	3.19199e-05
MSTRG.9128.1	89	65	231	420	645	517	41.91	53.74	101.32	192.17	302.81	267.78	65.6567	254.253	1.9533	2.39676e-07	3.19199e-05
MSTRG.5748.22	369	246	791	1461	1852	1470	173.76	203.37	346.94	668.47	869.46	761.38	241.357	766.437	1.667	2.70527e-07	3.47854e-05
MSTRG.146.51	1281	1111	2924	5361	5917	6295	603.21	918.46	1282.48	2452.87	2777.85	3260.46	934.717	2830.39	1.5984	2.74586e-07	3.47854e-05
XR_005576277.1	0	0	0	29	32	46	0	0	0	13.27	15.02	23.83	0.001	17.3733	14.0846	2.95766e-07	3.65764e-05
MSTRG.9334.1	51	31	53	5	6	9	24.02	25.63	23.25	2.29	2.82	4.66	24.3	3.25667	-2.8995	3.24169e-07	3.91566e-05
MSTRG.39.11	288	130	269	73	62	108	135.62	107.47	117.98	33.4	29.11	55.94	120.357	39.4833	-1.608	3.5163e-07	4.15083e-05
MSTRG.19391.1	430	309	425	190	173	180	202.48	255.45	186.41	86.93	81.22	93.23	214.78	87.1267	-1.3017	3.82468e-07	4.41453e-05
MSTRG.11285.1	184	131	254	831	983	490	86.64	108.3	111.41	380.22	461.49	253.79	102.117	365.167	1.8383	4.34485e-07	4.90591e-05
MSTRG.8381.1	24451	13288	20591	10623	6397	8656	11513.8	10985.2	9031.32	4860.45	3003.19	4483.33	10510.1	4115.66	-1.3526	5.32269e-07	5.88214e-05
MSTRG.4924.36	112	62	186	355	589	417	52.74	51.26	81.58	162.43	276.52	215.98	61.86	218.31	1.8193	5.83458e-07	6.3135e-05
MSTRG.6084.7	30	19	33	262	56	507	14.13	15.71	14.47	119.88	26.29	262.6	14.77	136.257	3.2056	6.57232e-07	6.96666e-05
XR_851002.3	456	157	369	69	56	160	214.73	129.79	161.85	31.57	26.29	82.87	168.79	46.91	-1.8473	8.54243e-07	8.87388e-05
MSTRG.15002.6	1427	919	2892	5069	5206	6535	671.96	759.74	1268.45	2319.27	2444.06	3384.77	900.05	2716.03	1.5934	8.81629e-07	8.9095e-05
XR_005576545.1	114	115	274	536	646	640	53.68	95.07	120.18	245.24	303.28	331.48	89.6433	293.333	1.7103	8.9198e-07	8.9095e-05
MSTRG.58.3	120	100	174	408	493	478	56.51	82.67	76.32	186.68	231.45	247.58	71.8333	221.903	1.6272	1.13338e-06	0.000110019
MSTRG.1580.1	138	135	221	701	721	474	64.98	111.6	96.93	320.74	338.49	245.51	91.17	301.58	1.7259	1.159e-06	0.000110019
MSTRG.18091.2	253	315	320	1677	3306	726	119.14	260.41	140.35	767.3	1552.07	376.03	173.3	898.467	2.3742	1.165e-06	0.000110019
XR_005574860.1	63	33	37	4	6	10	29.67	27.28	16.23	1.83	2.82	5.18	24.3933	3.27667	-2.8962	1.21138e-06	0.000112355
XR_005576451.1	15193	10319	9144	6358	3996	4043	7154.26	8530.73	4010.61	2909.04	1876	2094.05	6565.2	2293.03	-1.5176	1.54442e-06	0.000140105
XR_005576158.1	240	205	568	125	119	171	113.01	169.47	249.13	57.19	55.87	88.57	177.203	67.21	-1.3987	1.56451e-06	0.000140105
MSTRG.12074.5	101	82	184	441	611	335	47.56	67.79	80.7	201.78	286.85	173.51	65.35	220.713	1.7559	1.82712e-06	0.000160848
XR_005575465.1	168	146	341	614	810	710	79.11	120.7	149.56	280.93	380.27	367.74	116.457	342.98	1.5583	1.92396e-06	0.000166551
MSTRG.16558.2	195	210	495	100	105	155	91.82	173.61	217.11	45.75	49.29	80.28	160.847	58.44	-1.4607	1.99036e-06	0.000169474
MSTRG.19657.2	1116	580	1208	474	309	539	525.52	479.49	529.84	216.87	145.07	279.17	511.617	213.703	-1.2595	2.11865e-06	0.000177488
MSTRG.6683.9	176	153	256	83	31	75	82.88	126.49	112.28	37.98	14.55	38.85	107.217	30.46	-1.8155	2.22275e-06	0.000183253
MSTRG.8569.4	215	127	395	823	833	719	101.24	104.99	173.25	376.56	391.07	372.4	126.493	380.01	1.587	2.28965e-06	0.000185126
XR_005574970.1	48	130	193	30	41	28	22.6	107.47	84.65	13.73	19.25	14.5	71.5733	15.8267	-2.1771	2.31675e-06	0.000185126
XR_005576422.1	114	107	230	550	534	477	53.68	88.46	100.88	251.65	250.7	247.06	81.0067	249.803	1.6247	2.39069e-06	0.00018814
MSTRG.15232.1	18493	8764	21009	6453	6078	10662	8708.2	7245.21	9214.66	2952.51	2853.43	5522.33	8389.36	3776.09	-1.1517	2.85043e-06	0.000220972
MSTRG.8037.1	1708	727	866	385	261	579	804.28	601.01	379.83	176.15	122.53	299.89	595.04	199.523	-1.5764	3.02438e-06	0.000231009
MSTRG.11994.125	13	25	35	94	456	110	6.12	20.67	15.35	43.01	214.08	56.97	14.0467	104.687	2.8978	3.19485e-06	0.000240494
MSTRG.18177.10	1344	681	1149	521	497	631	632.88	562.98	503.96	238.38	233.33	326.82	566.607	266.177	-1.09	3.32757e-06	0.000246905
MSTRG.6716.2	2377	1329	4164	6985	7722	7998	1119.31	1098.69	1826.35	3195.92	3625.24	4142.52	1348.12	3654.56	1.4388	3.44786e-06	0.000250539
XR_005575920.1	214	140	404	726	1001	689	100.77	115.74	177.2	332.17	469.94	356.86	131.237	386.323	1.5576	3.50462e-06	0.000250539
MSTRG.3745.1	178	100	394	68	58	103	83.82	82.67	172.81	31.11	27.23	53.35	113.1	37.23	-1.6031	3.52125e-06	0.000250539
MSTRG.6505.1	253	118	390	101	108	121	119.14	97.55	171.06	46.21	50.7	62.67	129.25	53.1933	-1.2808	3.6979e-06	0.000259553
XR_005574968.1	20	19	57	153	164	141	9.42	15.71	25	70	76.99	73.03	16.71	73.34	2.1339	4.3014e-06	0.000297886
MSTRG.3374.4	1799	1630	4567	1038	889	1599	847.13	1347.52	2003.11	474.93	417.36	828.19	1399.25	573.493	-1.2868	4.95114e-06	0.000335001
XR_005575798.1	7584	3695	11823	4548	3066	3258	3571.24	3054.66	5185.63	2080.89	1439.39	1687.46	3937.18	1735.91	-1.1815	4.96633e-06	0.000335001
MSTRG.12564.53	255	94	221	88	48	63	120.08	77.71	96.93	40.26	22.53	32.63	98.24	31.8067	-1.627	5.34461e-06	0.000355896
MSTRG.5430.6	583	498	1125	2337	2639	1780	274.53	411.7	493.43	1069.27	1238.93	921.94	393.22	1076.71	1.4532	5.50357e-06	0.000361843
MSTRG.19930.6	3968	2087	2064	178	57	461	1868.5	1725.33	905.28	81.44	26.76	238.77	1499.7	115.657	-3.6968	5.59651e-06	0.000363353
MSTRG.18306.8	245	96	199	83	70	40	115.37	79.36	87.28	37.98	32.86	20.72	94.0033	30.52	-1.623	6.10689e-06	0.000391595
MSTRG.12134.1	48	27	159	187	532	439	22.6	22.32	69.74	85.56	249.76	227.38	38.22	187.567	2.295	6.71916e-06	0.000425602
XR_005575966.1	2827	1336	2705	815	653	1528	1331.21	1104.47	1186.43	372.9	306.56	791.42	1207.37	490.293	-1.3002	6.96143e-06	0.000435634
MSTRG.9215.1	25	17	58	138	174	137	11.77	14.05	25.44	63.14	81.69	70.96	17.0867	71.93	2.0737	7.16241e-06	0.000442876
MSTRG.4080.1	146	122	236	471	703	471	68.75	100.86	103.51	215.5	330.04	243.95	91.04	263.163	1.5314	7.42998e-06	0.000454016
MSTRG.9348.4	483	178	402	113	74	196	227.44	147.15	176.32	51.7	34.74	101.52	183.637	62.6533	-1.5514	7.94462e-06	0.000479818
MSTRG.20076.1	18	33	87	0	8	7	8.48	27.28	38.16	0	3.76	3.63	24.64	2.46333	-3.3223	8.05276e-06	0.000480759
MSTRG.152.5	87	56	191	358	376	404	40.97	46.3	83.77	163.8	176.52	209.25	57.0133	183.19	1.684	8.79878e-06	0.000519328
MSTRG.9159.14	2202	1071	2053	521	809	1232	1036.9	885.4	900.46	238.38	379.8	638.11	940.92	418.763	-1.1679	8.99737e-06	0.000521813
MSTRG.10288.1	4	1	7	209	71	3	1.88	0.83	3.07	95.63	33.33	1.55	1.92667	43.5033	4.4969	9.07055e-06	0.000521813
MSTRG.7117.1	809	323	791	243	191	392	380.95	267.02	346.94	111.18	89.67	203.03	331.637	134.627	-1.3006	9.14228e-06	0.000521813
MSTRG.5949.87	17	30	46	102	472	127	8.01	24.8	20.18	46.67	221.59	65.78	17.6633	111.347	2.6562	9.37562e-06	0.000523623
XR_005576519.1	3648	1733	2216	1501	981	597	1717.81	1432.67	971.95	686.77	460.55	309.21	1374.14	485.51	-1.501	9.6526e-06	0.000533357
MSTRG.3374.6	96	96	220	49	61	59	45.21	79.36	96.49	22.42	28.64	30.56	73.6867	27.2067	-1.4374	9.8215e-06	0.000533971
XR_005576014.1	2022	1156	1339	614	832	927	952.14	955.67	587.29	280.93	390.6	480.13	831.7	383.887	-1.1154	9.86931e-06	0.000533971
MSTRG.14632.29	158	133	280	549	682	521	74.4	109.95	122.81	251.19	320.18	269.85	102.387	280.407	1.4535	1.10355e-05	0.000590913
MSTRG.14113.10	230	144	490	2639	2019	345	108.31	119.04	214.92	1207.45	947.86	178.69	147.423	778	2.3998	1.16667e-05	0.000618337
MSTRG.1990.10	35	23	54	147	150	162	16.48	19.01	23.68	67.26	70.42	83.91	19.7233	73.8633	1.905	1.19534e-05	0.00062713
XR_003269264.2	11872	6809	14278	7472	4837	5388	5590.43	5629.01	6262.41	3418.74	2270.82	2790.69	5827.28	2826.75	-1.0437	1.36168e-05	0.000707254
MSTRG.18880.21	883	340	534	328	229	179	415.8	281.08	234.22	150.07	107.51	92.71	310.367	116.763	-1.4104	1.38561e-05	0.000712561
MSTRG.9081.2	465	319	600	1378	1672	1073	218.96	263.72	263.16	630.49	784.95	555.75	248.613	657.063	1.4021	1.44484e-05	0.000735737
MSTRG.2620.1	26	22	64	192	203	111	12.24	18.19	28.07	87.85	95.3	57.49	19.5	80.2133	2.0404	1.68591e-05	0.000850159
MSTRG.11881.2	180	295	178	80	67	108	84.76	243.88	78.07	36.6	31.45	55.94	135.57	41.33	-1.7138	1.76984e-05	0.0008839
MSTRG.12130.1	77	71	236	335	538	493	36.26	58.7	103.51	153.28	252.57	255.35	66.1567	220.4	1.7362	2.01509e-05	0.000994732
MSTRG.706.1	111	86	249	398	525	475	52.27	71.1	109.21	182.1	246.47	246.02	77.5267	224.863	1.5363	2.03007e-05	0.000994732
MSTRG.10330.7	318	247	515	169	162	240	149.74	204.2	225.88	77.32	76.05	124.31	193.273	92.56	-1.0622	2.08305e-05	0.00101116
MSTRG.6394.3	745	577	1498	312	458	656	350.81	477.01	657.03	142.75	215.02	339.77	494.95	232.513	-1.09	2.21343e-05	0.0010645
XR_005574859.1	116	1	12	3	1	1	54.62	0.83	5.26	1.37	0.47	0.52	20.2367	0.786667	-4.6851	2.30065e-05	0.00108704
MSTRG.2826.1	21	21	64	118	192	157	9.89	17.36	28.07	53.99	90.14	81.32	18.44	75.15	2.0269	2.30215e-05	0.00108704
XR_005576370.1	194	144	277	870	1088	395	91.35	119.04	121.49	398.06	510.78	204.59	110.627	371.143	1.7463	2.42154e-05	0.00113311
MSTRG.9882.14	77	103	170	324	447	518	36.26	85.15	74.56	148.24	209.85	268.3	65.3233	208.797	1.6764	2.45583e-05	0.00113889
MSTRG.19761.16	178	122	315	56	80	128	83.82	100.86	138.16	25.62	37.56	66.3	107.613	43.16	-1.3181	2.50086e-05	0.00114951
MSTRG.11270.9	738	567	1635	2495	2707	3017	347.52	468.74	717.12	1141.56	1270.85	1562.64	511.127	1325.02	1.3743	2.58595e-05	0.0011782
MSTRG.5780.9	155	99	129	11	28	72	72.99	81.84	56.58	5.03	13.15	37.29	70.47	18.49	-1.9303	3.09991e-05	0.00140008
MSTRG.1504.1	367	193	379	1346	1669	581	172.82	159.55	166.23	615.85	783.54	300.93	166.2	566.773	1.7699	3.3578e-05	0.00150348
MSTRG.7835.1	549	275	1047	140	298	372	258.52	227.34	459.22	64.06	139.9	192.68	315.027	132.213	-1.2526	3.48367e-05	0.00153172
MSTRG.8626.14	134	147	318	694	778	494	63.1	121.53	139.48	317.53	365.25	255.86	108.037	312.88	1.5341	3.50283e-05	0.00153172
MSTRG.11364.1	105	45	104	25	34	36	49.44	37.2	45.61	11.44	15.96	18.65	44.0833	15.35	-1.522	3.53423e-05	0.00153172
MSTRG.146.16	111	86	203	394	522	335	52.27	71.1	89.04	180.27	245.06	173.51	70.8033	199.613	1.4953	3.53883e-05	0.00153172
MSTRG.18390.24	136	119	303	649	612	472	64.04	98.38	132.9	296.94	287.32	244.47	98.44	276.243	1.4886	3.96339e-05	0.00169379
MSTRG.16552.11	55	36	139	27	17	21	25.9	29.76	60.97	12.35	7.98	10.88	38.8767	10.4033	-1.9019	3.97848e-05	0.00169379
XR_005574297.1	436	209	483	163	170	257	205.31	172.78	211.85	74.58	79.81	133.11	196.647	95.8333	-1.037	4.42077e-05	0.00186679
MSTRG.16637.1	69	27	58	241	273	136	32.49	22.32	25.44	110.27	128.17	70.44	26.75	102.96	1.9445	4.77009e-05	0.00199805
XR_005575752.1	154	88	340	473	685	617	72.52	72.75	149.13	216.42	321.59	319.57	98.1333	285.86	1.5425	4.88492e-05	0.00202978
MSTRG.8382.1	32271	20663	25209	18813	11755	9886	15196.1	17082.1	11056.8	8607.71	5518.61	5120.4	14445	6415.57	-1.1709	5.24001e-05	0.00214951
MSTRG.18240.53	866	595	2079	2878	3159	4228	407.79	491.89	911.86	1316.8	1483.05	2189.87	603.847	1663.24	1.4617	5.25583e-05	0.00214951
MSTRG.12139.1	19	46	69	163	216	256	8.95	38.03	30.26	74.58	101.41	132.59	25.7467	102.86	1.9982	5.32053e-05	0.00215897
MSTRG.690.1	182	141	183	45	47	115	85.7	116.56	80.26	20.59	22.07	59.56	94.1733	34.0733	-1.4667	5.53715e-05	0.00222104
MSTRG.18584.2	0	0	0	1	52	27	0	0	0	0.46	24.41	13.98	0.001	12.95	13.6607	5.55901e-05	0.00222104
MSTRG.11995.58	27	47	50	73	856	163	12.71	38.85	21.93	33.4	401.87	84.42	24.4967	173.23	2.822	5.67213e-05	0.00224893
XR_005576365.1	0	0	0	23	17	15	0	0	0	10.52	7.98	7.77	0.001	8.75667	13.0962	6.02425e-05	0.00235389
MSTRG.8100.3	76	56	90	16	7	37	35.79	46.3	39.47	7.32	3.29	19.16	40.52	9.92333	-2.0297	6.02747e-05	0.00235389
MSTRG.8386.1	2767	1761	3195	1388	832	1824	1302.96	1455.82	1401.34	635.07	390.6	944.73	1386.71	656.8	-1.0781	6.11056e-05	0.00236853
MSTRG.20574.3	1018	391	893	382	232	473	479.37	323.24	391.67	174.78	108.92	244.99	398.093	176.23	-1.1756	6.54231e-05	0.00251709
MSTRG.17372.1	277	222	556	135	196	237	130.44	183.53	243.86	61.77	92.02	122.75	185.943	92.18	-1.0123	7.06945e-05	0.0026802
XR_005574917.1	407	159	532	114	164	239	191.65	131.45	233.34	52.16	76.99	123.79	185.48	84.3133	-1.1374	7.16028e-05	0.00268868
MSTRG.7120.1	298	162	487	97	191	192	140.33	133.93	213.6	44.38	89.67	99.45	162.62	77.8333	-1.063	7.19535e-05	0.00268868
XR_005575418.1	180	216	465	815	896	884	84.76	178.57	203.95	372.9	420.64	457.86	155.76	417.133	1.4212	7.34599e-05	0.00272536
XR_005576694.1	157	155	290	103	84	119	73.93	128.14	127.2	47.13	39.44	61.64	109.757	49.4033	-1.1516	7.40919e-05	0.00272931
MSTRG.15788.3	553	372	1161	1721	1997	1791	260.4	307.53	509.22	787.43	937.53	927.64	359.05	884.2	1.3002	7.56538e-05	0.00275885
MSTRG.15163.42	11	34	36	69	500	118	5.18	28.11	15.79	31.57	234.73	61.12	16.36	109.14	2.7379	7.59559e-05	0.00275885
MSTRG.5574.10	128	102	375	465	749	698	60.27	84.32	164.48	212.76	351.63	361.53	103.023	308.64	1.583	7.82572e-05	0.0028227
XR_005575565.1	127	46	113	380	582	199	59.8	38.03	49.56	173.87	273.23	103.07	49.13	183.39	1.9002	8.37571e-05	0.00300024
MSTRG.11994.48	0	0	0	1	63	15	0	0	0	0.46	29.58	7.77	0.001	12.6033	13.6215	8.49465e-05	0.003022
MSTRG.9138.1	505	474	896	2809	2078	1275	237.8	391.86	392.99	1285.23	975.56	660.38	340.883	973.723	1.5142	8.64534e-05	0.00305435
MSTRG.6924.4	435	161	373	1363	1203	720	204.84	133.1	163.6	623.63	564.77	372.92	167.18	520.44	1.6383	8.70319e-05	0.00305435
MSTRG.17471.1	191	119	178	66	85	103	89.94	98.38	78.07	30.2	39.9	53.35	88.7967	41.15	-1.1096	9.25354e-05	0.0032257
MSTRG.14632.28	242	195	586	675	1303	1093	113.96	161.21	257.02	308.84	611.72	566.11	177.397	495.557	1.4821	9.45108e-05	0.00327259
MSTRG.20080.1	1	149	258	1	0	0	0.47	123.18	113.16	0.46	0	0	78.9367	0.153333	-9.0079	9.62419e-05	0.00331047
MSTRG.19983.21	677	518	1587	2205	2868	2340	318.79	428.23	696.07	1008.88	1346.44	1211.99	481.03	1189.1	1.3057	9.83941e-05	0.00336223
MSTRG.11994.143	37	90	101	162	1115	280	17.42	74.4	44.3	74.12	523.46	145.02	45.3733	247.533	2.4477	0.000102248	0.0034588
MSTRG.11995.32	7	17	19	35	343	58	3.3	14.05	8.33	16.01	161.03	30.04	8.56	69.0267	3.0115	0.00010316	0.0034588
MSTRG.17026.3	8	23	29	0	1	3	3.77	19.01	12.72	0	0.47	1.55	11.8333	0.673333	-4.1354	0.000103218	0.0034588
XR_005574209.1	4342	2561	4825	1570	1375	3215	2044.61	2117.18	2116.27	718.34	645.52	1665.19	2092.69	1009.68	-1.0515	0.000106907	0.00355947
XR_005575283.1	82	66	163	45	38	51	38.61	54.56	71.49	20.59	17.84	26.42	54.8867	21.6167	-1.3443	0.000108653	0.00359455
MSTRG.18390.21	314	221	476	935	1142	709	147.86	182.7	208.78	427.8	536.13	367.22	179.78	443.717	1.3034	0.000112629	0.00370249
MSTRG.1907.6	201	137	370	665	584	701	94.65	113.26	162.28	304.26	274.17	363.08	123.397	313.837	1.3467	0.000114536	0.00374152
XR_005576518.1	18	34	39	102	211	132	8.48	28.11	17.11	46.67	99.06	68.37	17.9	71.3667	1.9953	0.000123631	0.00401338
MSTRG.12564.77	69	18	58	16	4	10	32.49	14.88	25.44	7.32	1.88	5.18	24.27	4.79333	-2.3401	0.000124468	0.00401543
XR_005575494.1	50	25	21	456	180	57	23.54	20.67	9.21	208.64	84.5	29.52	17.8067	107.553	2.5946	0.000136993	0.00431239
XR_005574137.1	22	15	38	118	111	84	10.36	12.4	16.67	53.99	52.11	43.51	13.1433	49.87	1.9238	0.000138251	0.00432438
MSTRG.11995.91	27	58	89	131	708	196	12.71	47.95	39.04	59.94	332.38	101.52	33.2333	164.613	2.3084	0.000139039	0.00432438
MSTRG.1975.46	4	7	24	34	121	86	1.88	5.79	10.53	15.56	56.81	44.54	6.06667	38.97	2.6834	0.000146401	0.00452623
MSTRG.13344.5	123	62	190	57	58	62	57.92	51.26	83.34	26.08	27.23	32.11	64.1733	28.4733	-1.1724	0.000153189	0.00470806
MSTRG.12308.81	12	35	41	75	473	108	5.65	28.93	17.98	34.32	222.06	55.94	17.52	104.107	2.571	0.000158823	0.00485251
MSTRG.14841.2	110	55	151	312	307	302	51.8	45.47	66.23	142.75	144.13	156.42	54.5	147.767	1.439	0.000164193	0.00498725
MSTRG.9975.1	158	112	273	78	76	122	74.4	92.59	119.74	35.69	35.68	63.19	95.5767	44.8533	-1.0914	0.000170857	0.00512114
MSTRG.8606.16	174	63	142	57	63	56	81.94	52.08	62.28	26.08	29.58	29	65.4333	28.22	-1.2133	0.000171047	0.00512114
MSTRG.19853.1	15	7	7	128	69	31	7.06	5.79	3.07	58.57	32.39	16.06	5.30667	35.6733	2.749	0.000171559	0.00512114
MSTRG.6914.2	30	18	40	263	154	52	14.13	14.88	17.54	120.33	72.3	26.93	15.5167	73.1867	2.2378	0.000174227	0.00516779
MSTRG.3933.1	197	74	283	492	514	601	92.77	61.18	124.13	225.11	241.31	311.28	92.6933	259.233	1.4837	0.000175112	0.00516779
MSTRG.19704.1	49	39	136	214	380	191	23.07	32.24	59.65	97.91	178.4	98.93	38.32	125.08	1.7067	0.000181299	0.00530995
MSTRG.6379.3	613	366	832	2037	1800	1194	288.66	302.57	364.92	932.01	845.04	618.43	318.717	798.493	1.325	0.000190128	0.00551691
XR_850888.3	345	201	370	161	85	203	162.46	166.17	162.28	73.66	39.9	105.14	163.637	72.9	-1.1665	0.000194747	0.00561952
XR_850986.3	254	86	166	95	72	55	119.61	71.1	72.81	43.47	33.8	28.49	87.84	35.2533	-1.3171	0.000196074	0.00562654
XR_005576104.1	69	42	157	217	364	264	32.49	34.72	68.86	99.29	170.89	136.74	45.3567	135.64	1.5804	0.000197156	0.00562654
MSTRG.11994.89	7	15	19	40	228	56	3.3	12.4	8.33	18.3	107.04	29	8.01	51.4467	2.6832	0.000199537	0.00563259
MSTRG.9936.19	285	179	668	808	1205	1070	134.2	147.98	292.99	369.69	565.71	554.2	191.723	496.533	1.3729	0.000226833	0.00630038
MSTRG.4044.21	3	6	13	29	119	38	1.41	4.96	5.7	13.27	55.87	19.68	4.02333	29.6067	2.8795	0.000230728	0.00634075
MSTRG.13365.4	145	104	344	427	570	707	68.28	85.98	150.88	195.37	267.6	366.19	101.713	276.387	1.4422	0.000255977	0.00696096
MSTRG.9999.10	88	112	207	64	87	43	41.44	92.59	90.79	29.28	40.84	22.27	74.94	30.7967	-1.283	0.000277703	0.00751243
MSTRG.5692.1	21	14	23	78	140	60	9.89	11.57	10.09	35.69	65.73	31.08	10.5167	44.1667	2.0703	0.000285863	0.00765957
XR_005574752.1	14	11	27	0	3	0	6.59	9.09	11.84	0	1.41	0	9.17333	0.47	-4.2867	0.000286091	0.00765957
MSTRG.11651.60	141	109	224	385	578	360	66.4	90.11	98.25	176.15	271.35	186.46	84.92	211.32	1.3153	0.000314273	0.00837094
XR_005574861.1	88	70	171	330	273	346	41.44	57.87	75	150.99	128.17	179.21	58.1033	152.79	1.3949	0.000324554	0.00860067
MSTRG.9974.1	203	113	260	107	76	125	95.59	93.42	114.04	48.96	35.68	64.74	101.017	49.7933	-1.0206	0.000352044	0.0092818
MSTRG.16437.1	7	5	7	83	51	20	3.3	4.13	3.07	37.98	23.94	10.36	3.5	24.0933	2.7832	0.000354336	0.00929505
MSTRG.11994.132	6	11	17	9	324	52	2.83	9.09	7.46	4.12	152.11	26.93	6.46	61.0533	3.2405	0.000362054	0.00944979
MSTRG.691.1	273	121	360	94	93	186	128.55	100.03	157.9	43.01	43.66	96.34	128.827	61.0033	-1.0785	0.00037109	0.00958926
MSTRG.15160.52	10	25	21	28	353	98	4.71	20.67	9.21	12.81	165.72	50.76	11.53	76.43	2.7287	0.000389446	0.0100138
MSTRG.12826.9	129	85	279	420	468	430	60.75	70.27	122.37	192.17	219.71	222.72	84.4633	211.533	1.3245	0.000396976	0.0101073
XR_851077.3	176	50	209	58	76	66	82.88	41.34	91.67	26.54	35.68	34.18	71.9633	32.1333	-1.1632	0.000419233	0.0106219
XR_005576546.1	43	103	85	23	40	32	20.25	85.15	37.28	10.52	18.78	16.57	47.56	15.29	-1.6372	0.000432668	0.0109091
MSTRG.12307.24	19	36	51	69	414	125	8.95	29.76	22.37	31.57	194.36	64.74	20.36	96.89	2.2506	0.000441404	0.0110224
MSTRG.11995.64	24	69	93	108	822	214	11.3	57.04	40.79	49.41	385.9	110.84	36.3767	182.05	2.3232	0.000456474	0.0113442
MSTRG.4408.1	196	76	194	81	97	71	92.29	62.83	85.09	37.06	45.54	36.77	80.07	39.79	-1.0089	0.000472331	0.011627
MSTRG.9160.1	162	53	180	59	69	64	76.28	43.82	78.95	26.99	32.39	33.15	66.35	30.8433	-1.1051	0.000482791	0.0118284
XR_003268360.2	80	36	61	14	36	18	37.67	29.76	26.75	6.41	16.9	9.32	31.3933	10.8767	-1.5292	0.000495617	0.0119541
MSTRG.16671.16	93	59	226	45	82	29	43.79	48.78	99.12	20.59	38.5	15.02	63.8967	24.7033	-1.371	0.000495922	0.0119541
MSTRG.10986.1	19	12	29	68	80	98	8.95	9.92	12.72	31.11	37.56	50.76	10.53	39.81	1.9186	0.000496515	0.0119541
XR_005574695.1	781	603	1414	2148	2227	2200	367.77	498.5	620.19	982.8	1045.51	1139.48	495.487	1055.93	1.0916	0.000497129	0.0119541
MSTRG.2428.4	1127	860	1271	2554	2903	2723	530.69	710.96	557.47	1168.56	1362.87	1410.36	599.707	1313.93	1.1316	0.000503255	0.0120456
MSTRG.14935.1	15	15	48	5	2	6	7.06	12.4	21.05	2.29	0.94	3.11	13.5033	2.11333	-2.6757	0.000515812	0.0122896
MSTRG.3720.2	4	1	27	152	36	43	1.88	0.83	11.84	69.55	16.9	22.27	4.85	36.24	2.9015	0.000535227	0.0126939
MSTRG.3032.3	35	24	72	13	19	10	16.48	19.84	31.58	5.95	8.92	5.18	22.6333	6.68333	-1.7598	0.000553347	0.0130049
MSTRG.4043.22	11	17	31	27	349	66	5.18	14.05	13.6	12.35	163.84	34.18	10.9433	70.1233	2.6798	0.000580427	0.013519
MSTRG.9784.1	177	91	124	81	62	59	83.35	75.23	54.39	37.06	29.11	30.56	70.99	32.2433	-1.1386	0.000586585	0.0135826
MSTRG.8379.3	14	16	32	2	6	0	6.59	13.23	14.04	0.92	2.82	0	11.2867	1.24667	-3.1785	0.000589121	0.0135826
XR_003268609.2	75	87	126	324	392	213	35.32	71.92	55.26	148.24	184.03	110.32	54.1667	147.53	1.4455	0.000591002	0.0135826
MSTRG.3547.1	0	0	0	12	12	15	0	0	0	5.49	5.63	7.77	0.001	6.29667	12.6204	0.000607338	0.0138645
XR_005574765.1	0	0	0	13	10	16	0	0	0	5.95	4.69	8.29	0.001	6.31	12.6234	0.000609693	0.0138645
XR_850695.3	26	8	34	2	5	4	12.24	6.61	14.91	0.92	2.35	2.07	11.2533	1.78	-2.6604	0.00061223	0.0138645
MSTRG.18226.3	405	326	763	1184	1315	1086	190.71	269.5	334.66	541.73	617.35	562.49	264.957	573.857	1.1149	0.000619196	0.0139225
MSTRG.4818.7	232	157	298	536	602	568	109.25	129.79	130.7	245.24	282.62	294.19	123.247	274.017	1.1527	0.000656353	0.0146944
MSTRG.5949.110	10	28	36	53	382	74	4.71	23.15	15.79	24.25	179.34	38.33	14.55	80.64	2.4705	0.000669189	0.0149175
MSTRG.15736.8	596	461	596	1180	4717	1021	280.65	381.11	261.41	539.9	2214.49	528.82	307.723	1094.4	1.8304	0.000688233	0.0152424
XR_851466.3	269	195	487	753	944	650	126.67	161.21	213.6	344.53	443.18	336.66	167.16	374.79	1.1649	0.000693267	0.0152424
MSTRG.16111.1	228	197	401	859	944	495	107.36	162.86	175.88	393.03	443.18	256.38	148.7	364.197	1.2923	0.000694379	0.0152424
MSTRG.146.12	112	53	175	272	374	279	52.74	43.82	76.76	124.45	175.58	144.51	57.7733	148.18	1.3589	0.000695505	0.0152424
MSTRG.11999.1	17	39	52	42	599	125	8.01	32.24	22.81	19.22	281.21	64.74	21.02	121.723	2.5338	0.000718723	0.0156194
MSTRG.4043.33	8	21	21	67	153	60	3.77	17.36	9.21	30.66	71.83	31.08	10.1133	44.5233	2.1383	0.000748157	0.0161914
MSTRG.11994.88	17	33	43	41	446	118	8.01	27.28	18.86	18.76	209.38	61.12	18.05	96.42	2.4173	0.000764791	0.0164146
MSTRG.20306.1	10	19	21	75	158	45	4.71	15.71	9.21	34.32	74.18	23.31	9.87667	43.9367	2.1533	0.000769067	0.0164384
MSTRG.11994.87	20	59	97	84	761	202	9.42	48.78	42.54	38.43	357.27	104.62	33.58	166.773	2.3122	0.000773969	0.0164754
MSTRG.4743.2	82	83	125	270	358	230	38.61	68.62	54.83	123.54	168.07	119.13	54.02	136.913	1.3417	0.00081174	0.0171511
MSTRG.13274.12	30	87	116	115	964	267	14.13	71.92	50.88	52.62	452.57	138.29	45.6433	214.493	2.2325	0.000812315	0.0171511
XR_003268928.2	104	59	195	278	549	244	48.97	48.78	85.53	127.2	257.74	126.38	61.0933	170.44	1.4802	0.000860201	0.0179895
MSTRG.14175.9	79	34	65	204	428	100	37.2	28.11	28.51	93.34	200.93	51.79	31.2733	115.353	1.8831	0.000862418	0.0179895
MSTRG.11994.165	12	26	30	54	297	68	5.65	21.49	13.16	24.71	139.43	35.22	13.4333	66.4533	2.3065	0.000894687	0.018588
MSTRG.20264.67	12	22	31	17	407	92	5.65	18.19	13.6	7.78	191.07	47.65	12.48	82.1667	2.7189	0.000898903	0.0186012
MSTRG.18184.1	58	35	55	19	25	19	27.31	28.93	24.12	8.69	11.74	9.84	26.7867	10.09	-1.4086	0.000910114	0.0187585
XR_003268762.2	146	140	210	29	57	138	68.75	115.74	92.11	13.27	26.76	71.48	92.2	37.17	-1.3106	0.000927617	0.0189687
MSTRG.6393.2	85	74	191	49	58	75	40.03	61.18	83.77	22.42	27.23	38.85	61.66	29.5	-1.0636	0.000955572	0.0194637
MSTRG.5540.1	97	97	121	36	59	75	45.68	80.19	53.07	16.47	27.7	38.85	59.6467	27.6733	-1.1079	0.000963055	0.0195395
MSTRG.5772.1	584	434	1213	1444	1868	1941	275	358.79	532.03	660.69	876.97	1005.33	388.607	847.663	1.1252	0.000977552	0.0197564
MSTRG.12029.1	32	32	33	1	17	7	15.07	26.45	14.47	0.46	7.98	3.63	18.6633	4.02333	-2.2137	0.000986518	0.0197949
MSTRG.9131.1	9	7	41	48	109	102	4.24	5.79	17.98	21.96	51.17	52.83	9.33667	41.9867	2.169	0.000987076	0.0197949
XR_005575460.1	32	54	107	176	268	197	15.07	44.64	46.93	80.53	125.82	102.04	35.5467	102.797	1.532	0.000991067	0.0197985
MSTRG.2785.9	30	46	78	139	168	218	14.13	38.03	34.21	63.6	78.87	112.91	28.79	85.1267	1.564	0.000999448	0.0198894
MSTRG.18215.1	108	94	202	48	22	97	50.86	77.71	88.6	21.96	10.33	50.24	72.39	27.51	-1.3958	0.00101682	0.0201579
XR_005575624.1	45	21	31	90	155	119	21.19	17.36	13.6	41.18	72.77	61.64	17.3833	58.53	1.7515	0.00103646	0.020469
MSTRG.13274.59	8	14	18	34	176	46	3.77	11.57	7.89	15.56	82.63	23.83	7.74333	40.6733	2.3931	0.00109457	0.0215348
MSTRG.147.1	40	43	85	166	205	144	18.84	35.55	37.28	75.95	96.24	74.58	30.5567	82.2567	1.4286	0.00110163	0.021592
MSTRG.9132.1	3	4	13	41	76	21	1.41	3.31	5.7	18.76	35.68	10.88	3.47333	21.7733	2.6482	0.00111376	0.0216661
MSTRG.16635.17	82	29	158	218	388	214	38.61	23.97	69.3	99.74	182.15	110.84	43.96	130.91	1.5743	0.00114683	0.0222263
MSTRG.5759.1	1	3	18	24	73	58	0.47	2.48	7.89	10.98	34.27	30.04	3.61333	25.0967	2.7961	0.0011535	0.0222724
MSTRG.151.1	63	34	141	153	265	293	29.67	28.11	61.84	70	124.41	151.76	39.8733	115.39	1.533	0.00118637	0.0228223
MSTRG.6139.1	84	49	135	55	40	18	39.55	40.51	59.21	25.16	18.78	9.32	46.4233	17.7533	-1.3868	0.00122276	0.0234355
MSTRG.18428.59	47	31	73	125	179	144	22.13	25.63	32.02	57.19	84.03	74.58	26.5933	71.9333	1.4356	0.00122863	0.0234436
MSTRG.5949.45	11	28	35	26	416	94	5.18	23.15	15.35	11.9	195.3	48.69	14.56	85.2967	2.5505	0.00123579	0.0234436
MSTRG.11994.133	7	19	23	28	274	56	3.3	15.71	10.09	12.81	128.63	29	9.7	56.8133	2.5502	0.00123673	0.0234436
MSTRG.19085.5	412	190	398	196	92	240	194.01	157.07	174.56	89.68	43.19	124.31	175.213	85.7267	-1.0313	0.0012549	0.0237016
MSTRG.12148.1	123	90	165	342	643	216	57.92	74.4	72.37	156.48	301.87	111.88	68.23	190.077	1.4781	0.00126189	0.0237473
MSTRG.6286.1	33	38	30	14	8	12	15.54	31.41	13.16	6.41	3.76	6.22	20.0367	5.46333	-1.8748	0.00127454	0.0238245
XR_005575628.1	110	108	96	65	62	45	51.8	89.28	42.11	29.74	29.11	23.31	61.0633	27.3867	-1.1568	0.00127821	0.0238245
MSTRG.5748.23	40	20	67	103	150	142	18.84	16.53	29.39	47.13	70.42	73.55	21.5867	63.7	1.5612	0.00127975	0.0238245
MSTRG.4044.52	15	37	36	35	442	120	7.06	30.59	15.79	16.01	207.51	62.15	17.8133	95.2233	2.4184	0.00129046	0.023938
MSTRG.11108.2	190	116	294	438	634	413	89.47	95.9	128.95	200.4	297.64	213.91	104.773	237.317	1.1795	0.00132027	0.0243713
MSTRG.10530.1	28	18	63	114	154	92	13.18	14.88	27.63	52.16	72.3	47.65	18.5633	57.37	1.6278	0.0013232	0.0243713
MSTRG.12042.1	5	10	5	0	0	0	2.35	8.27	2.19	0	0	0	4.27	0.001	-12.06	0.0013656	0.0250633
MSTRG.20011.14	294	184	456	835	989	539	138.44	152.11	200	382.05	464.31	279.17	163.517	375.177	1.1981	0.0013761	0.0251672
MSTRG.20394.33	22	43	55	48	558	125	10.36	35.55	24.12	21.96	261.96	64.74	23.3433	116.22	2.3158	0.00139493	0.0254219
MSTRG.6344.3	73	77	147	229	335	255	34.38	63.66	64.47	104.78	157.27	132.08	54.17	131.377	1.2781	0.00140743	0.0255601
MSTRG.4784.1	401	330	722	1018	1058	1396	188.83	272.81	316.67	465.78	496.7	723.05	259.437	561.843	1.1148	0.00142546	0.0257974
MSTRG.3296.1	24	12	21	101	142	33	11.3	9.92	9.21	46.21	66.66	17.09	10.1433	43.32	2.0945	0.00144252	0.0259857
MSTRG.20264.55	28	53	67	53	702	149	13.18	43.82	29.39	24.25	329.57	77.17	28.7967	143.663	2.3187	0.00144587	0.0259857
MSTRG.19849.38	10	18	21	101	88	45	4.71	14.88	9.21	46.21	41.31	23.31	9.6	36.9433	1.9442	0.00149046	0.0266946
MSTRG.16519.11	61	16	96	161	233	151	28.72	13.23	42.11	73.66	109.39	78.21	28.02	87.0867	1.636	0.00151817	0.0270974
MSTRG.3465.12	114	99	183	101	57	40	53.68	81.84	80.26	46.21	26.76	20.72	71.9267	31.23	-1.2036	0.00153336	0.0271948
XR_005576293.1	521	270	527	1237	1723	716	245.33	223.21	231.15	565.98	808.9	370.85	233.23	581.91	1.319	0.0015341	0.0271948
MSTRG.11169.1	74	46	98	37	31	42	34.85	38.03	42.98	16.93	14.55	21.75	38.62	17.7433	-1.1221	0.00154345	0.0272676
MSTRG.4317.1	11	28	43	8	4	8	5.18	23.15	18.86	3.66	1.88	4.14	15.73	3.22667	-2.2854	0.001565	0.0275545
MSTRG.15163.5	5	14	12	18	195	44	2.35	11.57	5.26	8.24	91.55	22.79	6.39333	40.86	2.676	0.00157625	0.0276589
MSTRG.18950.28	80	80	232	305	354	389	37.67	66.14	101.76	139.55	166.19	201.48	68.5233	169.073	1.303	0.00161186	0.0280939
MSTRG.13451.1	1706	995	1203	580	369	1209	803.34	822.57	527.64	265.37	173.23	626.2	717.85	354.933	-1.0161	0.00161747	0.0280974
MSTRG.462.2	3	4	7	5	138	20	1.41	3.31	3.07	2.29	64.79	10.36	2.59667	25.8133	3.3134	0.00165995	0.0287393
XR_003269222.2	483	224	442	1065	1261	709	227.44	185.18	193.86	487.28	592	367.22	202.16	482.167	1.254	0.0016996	0.0293263
XR_005574324.1	169	140	255	482	482	424	79.58	115.74	111.84	220.53	226.28	219.61	102.387	222.14	1.1174	0.00170515	0.0293263
MSTRG.6918.2	21	12	41	86	123	61	9.89	9.92	17.98	39.35	57.74	31.59	12.5967	42.8933	1.7677	0.00172599	0.0295867
MSTRG.6685.1	71	62	128	53	44	43	33.43	51.26	56.14	24.25	20.66	22.27	46.9433	22.3933	-1.0679	0.00176039	0.0300772
MSTRG.18669.3	51	50	74	213	173	149	24.02	41.34	32.46	97.46	81.22	77.17	32.6067	85.2833	1.3871	0.00176768	0.0301027
MSTRG.12391.1	37	31	91	134	220	129	17.42	25.63	39.91	61.31	103.28	66.81	27.6533	77.1333	1.4799	0.00179579	0.0304815
XR_005576155.1	281	121	358	82	61	215	132.32	100.03	157.02	37.52	28.64	111.36	129.79	59.1733	-1.1332	0.00181251	0.0306651
MSTRG.3374.7	103	86	256	66	42	105	48.5	71.1	112.28	30.2	19.72	54.38	77.2933	34.7667	-1.1526	0.0018243	0.0307644
MSTRG.3143.1	84	89	187	305	414	256	39.55	73.58	82.02	139.55	194.36	132.59	65.05	155.5	1.2573	0.001855	0.0310642
XR_850984.3	712	368	733	314	119	487	335.27	304.23	321.5	143.67	55.87	252.24	320.333	150.593	-1.0889	0.00185708	0.0310642
MSTRG.4043.15	8	18	24	17	284	64	3.77	14.88	10.53	7.78	133.33	33.15	9.72667	58.0867	2.5782	0.00186589	0.0310642
MSTRG.3669.1	93	63	134	16	86	25	43.79	52.08	58.77	7.32	40.37	12.95	51.5467	20.2133	-1.3506	0.00187213	0.0310642
MSTRG.11994.142	5	13	10	25	154	35	2.35	10.75	4.39	11.44	72.3	18.13	5.83	33.9567	2.5421	0.00187373	0.0310642
MSTRG.11995.107	5	6	9	17	98	31	2.35	4.96	3.95	7.78	46.01	16.06	3.75333	23.2833	2.6331	0.00188679	0.0311111
MSTRG.14153.7	127	59	264	311	482	376	59.8	48.78	115.79	142.3	226.28	194.75	74.79	187.777	1.3281	0.00192174	0.0315871
MSTRG.5576.1	8	11	24	76	67	45	3.77	9.09	10.53	34.77	31.45	23.31	7.79667	29.8433	1.9365	0.00195257	0.0319926
MSTRG.1881.2	33	15	58	120	89	133	15.54	12.4	25.44	54.9	41.78	68.89	17.7933	55.19	1.6331	0.00196221	0.0320495
XR_005576724.1	173	43	120	54	35	64	81.46	35.55	52.63	24.71	16.43	33.15	56.5467	24.7633	-1.1912	0.00197528	0.0321618
MSTRG.376.2	90	112	255	364	476	378	42.38	92.59	111.84	166.54	223.47	195.78	82.27	195.263	1.247	0.00199754	0.0323215
MSTRG.11443.2	3	3	8	7	75	41	1.41	2.48	3.51	3.2	35.21	21.24	2.46667	19.8833	3.0109	0.00202586	0.0326523
MSTRG.18047.2	169	163	206	103	59	143	79.58	134.75	90.35	47.13	27.7	74.07	101.56	49.6333	-1.033	0.00203056	0.0326523
MSTRG.12307.83	19	44	64	130	241	115	8.95	36.37	28.07	59.48	113.14	59.56	24.4633	77.3933	1.6616	0.00206361	0.0329797
MSTRG.16988.1	11	29	36	39	288	100	5.18	23.97	15.79	17.84	135.21	51.79	14.98	68.28	2.1884	0.00207728	0.0330358
MSTRG.5949.68	15	59	69	88	510	162	7.06	48.78	30.26	40.26	239.43	83.91	28.7	121.2	2.0783	0.00207984	0.0330358
MSTRG.8214.1	41	28	90	112	194	161	19.31	23.15	39.47	51.24	91.08	83.39	27.31	75.2367	1.462	0.0020893	0.0330848
MSTRG.9072.4	91	60	108	268	289	171	42.85	49.6	47.37	122.62	135.68	88.57	46.6067	115.623	1.3108	0.00209998	0.0331528
MSTRG.10719.20	229	115	211	538	451	446	107.83	95.07	92.55	246.16	211.73	231	98.4833	229.63	1.2214	0.00213425	0.0335917
MSTRG.13275.44	14	49	59	73	486	120	6.59	40.51	25.88	33.4	228.16	62.15	24.3267	107.903	2.1491	0.00214129	0.0336007
MSTRG.13274.48	8	24	37	32	292	87	3.77	19.84	16.23	14.64	137.09	45.06	13.28	65.5967	2.3044	0.00217196	0.0339793
MSTRG.12564.84	72	50	124	44	36	49	33.9	41.34	54.39	20.13	16.9	25.38	43.21	20.8033	-1.0546	0.00220907	0.0344561
MSTRG.6961.3	6	7	11	27	77	35	2.83	5.79	4.82	12.35	36.15	18.13	4.48	22.21	2.3096	0.00222452	0.0345933
MSTRG.5949.34	4	7	8	15	97	33	1.88	5.79	3.51	6.86	45.54	17.09	3.72667	23.1633	2.6359	0.00227181	0.0352233
MSTRG.19688.7	297	187	430	694	798	599	139.85	154.59	188.6	317.53	374.64	310.25	161.013	334.14	1.0533	0.00229162	0.0354246
MSTRG.624.2	47	53	52	206	236	105	22.13	43.82	22.81	94.25	110.79	54.38	29.5867	86.4733	1.5473	0.00231503	0.0356803
XR_005575951.1	67	10	65	16	4	17	31.55	8.27	28.51	7.32	1.88	8.81	22.7767	6.00333	-1.9237	0.00233527	0.0358304
XR_005575209.1	215	126	396	581	529	620	101.24	104.16	173.69	265.83	248.35	321.13	126.363	278.437	1.1398	0.00233856	0.0358304
XR_005574961.1	77	54	159	179	335	260	36.26	44.64	69.74	81.9	157.27	134.67	50.2133	124.613	1.3113	0.00240356	0.0366102
MSTRG.19235.18	48	33	61	16	33	13	22.6	27.28	26.75	7.32	15.49	6.73	25.5433	9.84667	-1.3752	0.00241322	0.0366499
MSTRG.10138.10	107	95	201	281	395	325	50.39	78.54	88.16	128.57	185.44	168.33	72.3633	160.78	1.1518	0.00243393	0.0368543
XR_005574641.1	112	92	247	368	410	327	52.74	76.06	108.34	168.37	192.48	169.37	79.0467	176.74	1.1609	0.00247498	0.0372322
MSTRG.13367.1	25	18	67	133	108	104	11.77	14.88	29.39	60.85	50.7	53.87	18.68	55.14	1.5616	0.00248258	0.0372322
MSTRG.7505.1	67	54	121	41	36	52	31.55	44.64	53.07	18.76	16.9	26.93	43.0867	20.8633	-1.0463	0.00250723	0.0372566
MSTRG.12307.80	4	4	4	23	50	21	1.88	3.31	1.75	10.52	23.47	10.88	2.31333	14.9567	2.6927	0.00251557	0.0372566
MSTRG.7450.1	9	14	21	3	3	1	4.24	11.57	9.21	1.37	1.41	0.52	8.34	1.1	-2.9225	0.00251773	0.0372566
XR_005575114.1	20	27	30	74	106	105	9.42	22.32	13.16	33.86	49.76	54.38	14.9667	46	1.6199	0.00264229	0.0388784
MSTRG.12308.102	4	16	21	67	82	52	1.88	13.23	9.21	30.66	38.5	26.93	8.10667	32.03	1.9822	0.00266075	0.0390393
XR_005575398.1	314	209	214	1403	900	346	147.86	172.78	93.86	641.93	422.52	179.21	138.167	414.553	1.5851	0.0026772	0.0391701
XR_005574350.1	1	91	13	0	0	0	0.47	75.23	5.7	0	0	0	27.1333	0.001	-14.7278	0.00270394	0.0394502
MSTRG.4043.39	1	5	4	8	104	14	0.47	4.13	1.75	3.66	48.82	7.25	2.11667	19.91	3.2336	0.00272323	0.0394613
MSTRG.4555.1	161	151	381	369	813	627	75.81	124.83	167.11	168.83	381.68	324.75	122.583	291.753	1.251	0.00275457	0.0395084
MSTRG.11994.108	1	10	16	14	166	42	0.47	8.27	7.02	6.41	77.93	21.75	5.25333	35.3633	2.7509	0.00275898	0.0395084
MSTRG.4043.16	0	0	0	71	55	1	0	0	0	32.49	25.82	0.52	0.001	19.61	14.2593	0.00276878	0.0395084
MSTRG.20455.12	2	3	2	49	30	5	0.94	2.48	0.88	22.42	14.08	2.59	1.43333	13.03	3.1844	0.00280414	0.0397942
MSTRG.11995.77	6	18	22	10	307	57	2.83	14.88	9.65	4.58	144.13	29.52	9.12	59.41	2.7036	0.00281702	0.0398682
XR_005575495.1	477	296	574	1153	1145	841	224.62	244.7	251.76	527.54	537.54	435.59	240.36	500.223	1.0574	0.00286753	0.040363
MSTRG.4931.1	230	155	533	526	916	766	108.31	128.14	233.78	240.67	430.03	396.75	156.743	355.817	1.1827	0.00294419	0.0411078
MSTRG.19084.30	28	15	58	8	11	14	13.18	12.4	25.44	3.66	5.16	7.25	17.0067	5.35667	-1.6667	0.0029554	0.0411538
MSTRG.11698.1	16	25	13	2	4	7	7.53	20.67	5.7	0.92	1.88	3.63	11.3	2.14333	-2.3984	0.00298572	0.0414648
XR_005575393.1	5	3	4	27	41	20	2.35	2.48	1.75	12.35	19.25	10.36	2.19333	13.9867	2.6729	0.00302559	0.0418227
XR_850844.3	14	4	3	31	103	23	6.59	3.31	1.32	14.18	48.36	11.91	3.74	24.8167	2.7302	0.00307616	0.0423808
MSTRG.7822.1	59	31	117	165	278	142	27.78	25.63	51.32	75.49	130.51	73.55	34.91	93.1833	1.4164	0.00311313	0.0425388
MSTRG.12307.84	10	18	26	29	215	57	4.71	14.88	11.4	13.27	100.94	29.52	10.33	47.91	2.2135	0.00311651	0.0425388
MSTRG.5766.1	138	75	351	401	533	462	64.98	62	153.95	183.47	250.23	239.29	93.6433	224.33	1.2604	0.00312039	0.0425388
MSTRG.17454.4	84	39	74	15	9	50	39.55	32.24	32.46	6.86	4.23	25.9	34.75	12.33	-1.4948	0.00315807	0.0429398
MSTRG.5949.28	9	24	21	36	217	63	4.24	19.84	9.21	16.47	101.87	32.63	11.0967	50.3233	2.1811	0.00318031	0.0431293
MSTRG.10650.1	47	34	127	133	217	235	22.13	28.11	55.7	60.85	101.87	121.72	35.3133	94.8133	1.4249	0.00320614	0.0433664
MSTRG.17478.1	225	166	243	683	950	295	105.95	137.23	106.58	312.5	446	152.79	116.587	303.763	1.3815	0.00327018	0.0441177
MSTRG.4043.24	5	13	24	9	241	58	2.35	10.75	10.53	4.12	113.14	30.04	7.87667	49.1	2.6401	0.00337428	0.0452868
XR_005575859.1	1166	464	792	2319	2310	1699	549.06	383.59	347.38	1061.04	1084.47	879.99	426.677	1008.5	1.241	0.00338916	0.0453694
MSTRG.9267.2	8	4	10	38	60	22	3.77	3.31	4.39	17.39	28.17	11.39	3.82333	18.9833	2.3118	0.00350187	0.0467577
XR_005576686.1	522	461	691	1233	1439	1205	245.81	381.11	303.08	564.15	675.57	624.12	310	621.28	1.003	0.0035344	0.0470709
MSTRG.1324.1	191	67	116	367	385	315	89.94	55.39	50.88	167.92	180.75	163.15	65.4033	170.607	1.3832	0.00357819	0.0475322
MSTRG.9336.1	80	57	94	56	40	22	37.67	47.12	41.23	25.62	18.78	11.39	42.0067	18.5967	-1.1756	0.00363831	0.0482077
MSTRG.11994.5	0	0	0	8	26	1	0	0	0	3.66	12.21	0.52	0.001	5.46333	12.4156	0.0037284	0.0490262
MSTRG.4044.15	1	9	10	26	78	34	0.47	7.44	4.39	11.9	36.62	17.61	4.1	22.0433	2.4266	0.00378402	0.0496318
MSTRG.8105.1	9	8	21	38	77	46	4.24	6.61	9.21	17.39	36.15	23.83	6.68667	25.79	1.9475	0.00380066	0.0497246
