# Supplementary material for: Transcriptomic Analysis of Metarhizium anisopliae-Induced Immune-Related Long Non-Coding RNAs in Polymorphic Worker Castes of Solenopsis invicta
Source: Int J Mol Sci. 2023 Sep 12;24(18):13983. doi: 10.3390/ijms241813983 (PMC10531276; doi:10.3390/ijms241813983)
Supplement: Supplementary file 1 [file ijms-24-13983-s001.zip › Table S3 List of Differentially expressed lncRNAs in Metarhizium anisopliae-infected Solenopsis invicta workers at M6hD vs. M6hX..xlsx]

## Sheet: M_6hD-vs-M_6hX.filter
Table S3: List of Differentially expressed lncRNAs in Metarhizium anisopliae-infected Solenopsis invicta workers at M6hD vs. M6hX.
id	M_6hD1	M_6hD2	M_6hD3	M_6hX1	M_6hX2	M_6hX3	M_6hD1_CPM	M_6hD2_CPM	M_6hD3_CPM	M_6hX1_CPM	M_6hX2_CPM	M_6hX3_CPM	M_6hD_mean	M_6hX_mean	log2(fc)	PValue	FDR
XR_005576089.1	7330	6665	8186	2648	1571	2006	3277.19	3051.28	3587.36	1009.79	901.71	1222.75	3305.28	1044.75	-1.6616	6.2244e-30	3.25723e-26
MSTRG.6394.3	1221	1322	1061	463	271	296	545.9	605.22	464.96	176.56	155.55	180.43	538.693	170.847	-1.6568	5.73404e-24	1.50031e-20
MSTRG.11168.1	642	712	711	272	173	160	287.03	325.96	311.58	103.72	99.3	97.53	308.19	100.183	-1.6212	6.37557e-22	1.11211e-18
MSTRG.4719.1	2738	2200	2215	6874	5201	5075	1224.14	1007.17	970.68	2621.33	2985.22	3093.46	1067.33	2900	1.442	3.11156e-20	4.07069e-17
XR_005575796.1	16757	19815	20942	9765	5668	6213	7491.94	9071.44	9177.44	3723.79	3253.26	3787.13	8580.27	3588.06	-1.2578	7.76172e-19	8.12342e-16
MSTRG.3933.1	330	300	345	1239	640	737	147.54	137.34	151.19	472.48	367.34	449.24	145.357	429.687	1.5637	2.09152e-16	1.82415e-13
MSTRG.13037.1	709	718	641	1918	1383	1284	316.99	328.71	280.91	731.41	793.8	782.66	308.87	769.29	1.3165	9.48347e-16	7.08957e-13
MSTRG.6716.2	3174	3198	3025	8283	5575	4827	1419.07	1464.07	1325.65	3158.64	3199.89	2942.29	1402.93	3100.27	1.144	2.19435e-14	1.43538e-11
MSTRG.13039.3	145	138	140	517	317	320	64.83	63.18	61.35	197.15	181.95	195.06	63.12	191.387	1.6003	2.48351e-14	1.44402e-11
XR_005576519.1	1819	1781	1847	1140	576	595	813.26	815.35	809.41	434.73	330.61	362.68	812.673	376.007	-1.1119	4.47927e-14	2.344e-11
MSTRG.15002.6	3383	3043	2517	8312	5438	5249	1512.52	1393.11	1103.03	3169.7	3121.25	3199.52	1336.22	3163.49	1.2434	1.07839e-13	5.13018e-11
MSTRG.5772.1	842	820	836	2078	1479	1670	376.45	375.4	366.36	792.42	848.9	1017.95	372.737	886.423	1.2498	1.63099e-13	7.11247e-11
XR_005574325.1	2316	2101	2090	5502	3368	3948	1035.47	961.85	915.9	2098.13	1933.13	2406.5	971.073	2145.92	1.1439	1.93908e-13	7.80556e-11
MSTRG.12134.1	189	203	189	570	479	468	84.5	92.93	82.83	217.36	274.93	285.27	86.7533	259.187	1.579	2.77636e-13	1.03776e-10
MSTRG.9288.16	792	843	1068	460	282	316	354.1	385.93	468.03	175.42	161.86	192.62	402.687	176.633	-1.1889	2.48822e-12	8.68057e-10
MSTRG.18138.1	2111	2089	2230	5545	3620	3093	943.81	956.36	977.26	2114.53	2077.77	1885.33	959.143	2025.88	1.0787	3.87402e-12	1.26705e-09
MSTRG.9882.14	257	220	209	659	450	454	114.9	100.72	91.59	251.3	258.29	276.74	102.403	262.11	1.3559	5.12927e-12	1.57891e-09
MSTRG.20574.3	1500	1407	1862	907	628	500	670.64	644.13	815.99	345.88	360.45	304.77	710.253	337.033	-1.0754	5.77659e-12	1.67938e-09
XR_850623.3	11955	12296	12308	6652	5127	3146	5345	5629.19	5393.75	2536.67	2942.75	1917.64	5455.98	2465.69	-1.1458	7.08936e-12	1.95256e-09
MSTRG.13365.4	302	234	283	745	509	580	135.02	107.13	124.02	284.1	292.15	353.54	122.057	309.93	1.3444	1.81073e-11	4.73777e-09
MSTRG.15831.1	397	315	334	898	618	648	177.5	144.21	146.37	342.44	354.71	394.99	156.027	364.047	1.2223	4.07547e-11	1.01557e-08
MSTRG.11293.5	968	1278	1901	629	310	374	432.79	585.08	833.08	239.86	177.93	227.97	616.983	215.253	-1.5192	5.91823e-11	1.34653e-08
MSTRG.146.47	265	271	234	768	458	469	118.48	124.07	102.55	292.87	262.88	285.88	115.033	280.543	1.2862	9.28824e-11	2.02522e-08
MSTRG.12139.1	126	125	105	443	235	278	56.33	57.23	46.01	168.93	134.88	169.45	53.19	157.753	1.5684	1.09172e-10	2.28519e-08
MSTRG.146.16	227	207	179	574	389	489	101.49	94.77	78.44	218.89	223.27	298.07	91.5667	246.743	1.4301	3.25904e-10	6.55945e-08
XR_005574994.1	80	96	112	678	197	293	35.77	43.95	49.08	258.55	113.07	178.6	42.9333	183.407	2.0949	3.7231e-10	7.02915e-08
XR_003269161.2	2324	2941	4457	1484	1035	990	1039.05	1346.41	1953.2	565.91	594.06	603.45	1446.22	587.807	-1.2989	3.76106e-10	7.02915e-08
XR_003268920.2	4907	7869	5381	3452	1830	1441	2193.89	3602.48	2358.12	1316.39	1050.37	878.36	2718.16	1081.71	-1.3293	5.99708e-10	1.04609e-07
MSTRG.20371.27	29899	35130	24171	15232	12763	10724	13367.6	16082.8	10592.5	5808.57	7325.58	6536.8	13347.6	6556.98	-1.0255	6.4443e-10	1.08784e-07
MSTRG.16558.2	551	506	445	252	105	176	246.35	231.65	195.01	96.1	60.27	107.28	224.337	87.8833	-1.352	6.81971e-10	1.11524e-07
XR_005574236.1	353	355	354	934	743	539	157.82	162.52	155.13	356.17	426.46	328.55	158.49	370.393	1.2247	1.4153e-09	2.24432e-07
XR_005575752.1	373	278	291	869	530	748	166.77	127.27	127.53	331.38	304.2	455.94	140.523	363.84	1.3725	1.51831e-09	2.33687e-07
XR_005576650.1	579	565	504	250	228	204	258.87	258.66	220.87	95.34	130.87	124.35	246.133	116.853	-1.0747	1.79388e-09	2.6821e-07
MSTRG.146.51	3311	3280	2613	7874	4731	4627	1480.33	1501.61	1145.1	3002.67	2715.45	2820.38	1375.68	2846.17	1.0489	2.1689e-09	3.15274e-07
XR_005575465.1	379	315	348	866	548	550	169.45	144.21	152.5	330.24	314.54	335.25	155.387	326.677	1.072	3.66391e-09	4.79332e-07
MSTRG.8379.3	62	61	76	1	9	1	27.72	27.93	33.31	0.38	5.17	0.61	29.6533	2.05333	-3.8522	6.28668e-09	7.96155e-07
MSTRG.810.25	78	66	60	221	169	165	34.87	30.22	26.29	84.28	97	100.58	30.46	93.9533	1.625	6.38993e-09	7.96155e-07
MSTRG.14691.1	147	109	108	355	241	308	65.72	49.9	47.33	135.38	138.33	187.74	54.3167	153.817	1.5017	7.43694e-09	9.05059e-07
MSTRG.14766.1	175	80	104	26	23	7	78.24	36.62	45.58	9.91	13.2	4.27	53.48	9.12667	-2.5508	8.05782e-09	9.58331e-07
XR_003269298.2	410	371	561	252	148	140	183.31	169.85	245.85	96.1	84.95	85.34	199.67	88.7967	-1.169	9.25932e-09	1.07676e-06
XR_003269299.2	1380	1079	1069	601	391	548	616.99	493.97	468.47	229.19	224.42	334.03	526.477	262.547	-1.0038	1.09685e-08	1.24779e-06
MSTRG.14632.29	342	307	351	832	496	608	152.91	140.55	153.82	317.27	284.69	370.61	149.093	324.19	1.1206	1.39072e-08	1.54843e-06
MSTRG.3903.1	2536	3453	2312	1352	1175	1021	1133.83	1580.81	1013.19	515.57	674.42	622.35	1242.61	604.113	-1.0405	1.81689e-08	1.98078e-06
MSTRG.6393.2	221	180	135	63	44	54	98.81	82.41	59.16	24.02	25.25	32.92	80.1267	27.3967	-1.5483	3.43618e-08	3.59631e-06
MSTRG.12391.1	61	85	54	222	167	213	27.27	38.91	23.66	84.66	95.85	129.83	29.9467	103.447	1.7884	3.84838e-08	3.8897e-06
MSTRG.5430.6	1117	1187	928	2543	1724	1573	499.4	543.42	406.68	969.75	989.53	958.82	483.167	972.7	1.0095	3.86517e-08	3.8897e-06
XR_005574324.1	179	227	224	533	387	471	80.03	103.92	98.16	203.25	222.13	287.1	94.0367	237.493	1.3366	4.16954e-08	4.05401e-06
XR_851118.3	43	31	60	159	156	133	19.23	14.19	26.29	60.63	89.54	81.07	19.9033	77.08	1.9533	4.247e-08	4.05401e-06
MSTRG.5281.15	2118	1646	1298	4171	2717	3392	946.94	753.55	568.82	1590.57	1559.48	2067.59	756.437	1739.21	1.2011	4.26085e-08	4.05401e-06
MSTRG.6924.6	203	134	137	435	297	386	90.76	61.35	60.04	165.88	170.47	235.29	70.7167	190.547	1.43	5.16386e-08	4.82544e-06
XR_005574861.1	158	119	130	355	249	319	70.64	54.48	56.97	135.38	142.92	194.45	60.6967	157.583	1.3764	7.2574e-08	6.47638e-06
MSTRG.146.12	137	107	166	417	239	341	61.25	48.99	72.75	159.02	137.18	207.86	60.9967	168.02	1.4618	7.30186e-08	6.47638e-06
MSTRG.18263.8	666	693	538	1432	978	1061	297.76	317.26	235.77	546.08	561.34	646.73	283.597	584.717	1.0439	1.11217e-07	9.46376e-06
MSTRG.5748.22	863	799	669	1784	1177	1668	385.84	365.79	293.18	680.31	675.56	1016.73	348.27	790.867	1.1832	1.12126e-07	9.46376e-06
MSTRG.1558.2	954	850	994	2115	1353	2053	426.53	389.14	435.6	806.53	776.58	1251.4	417.09	944.837	1.1797	1.19063e-07	9.80113e-06
XR_851002.3	408	608	314	196	151	115	182.41	278.35	137.6	74.74	86.67	70.1	199.453	77.17	-1.3699	1.19869e-07	9.80113e-06
XR_005574917.1	760	917	891	295	199	388	339.79	419.81	390.46	112.5	114.22	236.5	383.353	154.407	-1.3119	1.29822e-07	1.04517e-05
MSTRG.15031.1	131	120	127	42	42	29	58.57	54.94	55.66	16.02	24.11	17.68	56.39	19.27	-1.5491	1.4979e-07	1.18765e-05
MSTRG.12130.1	380	246	207	743	530	588	169.9	112.62	90.71	283.34	304.2	358.41	124.41	315.317	1.3417	1.54884e-07	1.20972e-05
XR_005576293.1	187	258	494	2055	680	690	83.61	118.11	216.49	783.65	390.3	420.59	139.403	531.513	1.9308	1.97037e-07	1.50494e-05
MSTRG.19863.1	788	743	621	1676	1076	1650	352.31	340.15	272.14	639.13	617.59	1005.76	321.533	754.16	1.2299	1.98434e-07	1.50494e-05
MSTRG.1282.5	202	171	169	475	277	345	90.31	78.28	74.06	181.14	158.99	210.29	80.8833	183.473	1.1817	2.17789e-07	1.62813e-05
MSTRG.5574.10	355	347	210	743	642	682	158.72	158.86	92.03	283.34	368.49	415.71	136.537	355.847	1.382	2.49059e-07	1.81017e-05
XR_005575418.1	622	432	559	1282	770	1064	278.09	197.77	244.97	488.88	441.96	648.56	240.277	526.467	1.1316	2.77642e-07	1.99027e-05
MSTRG.4919.3	903	987	698	554	321	186	403.73	451.86	305.89	211.26	184.24	113.38	387.16	169.627	-1.1906	3.99288e-07	2.78596e-05
MSTRG.935.1	471	409	329	1201	796	536	210.58	187.24	144.18	457.99	456.88	326.72	180.667	413.863	1.1958	5.2287e-07	3.5898e-05
MSTRG.14153.7	337	274	295	671	460	615	150.67	125.44	129.28	255.88	264.03	374.87	135.13	298.26	1.1422	5.28215e-07	3.5898e-05
MSTRG.1907.6	294	309	266	762	464	407	131.45	141.46	116.57	290.58	266.32	248.09	129.827	268.33	1.0474	6.11799e-07	4.05259e-05
MSTRG.3426.1	209	201	195	483	312	445	93.44	92.02	85.46	184.19	179.08	271.25	90.3067	211.507	1.2278	6.29673e-07	4.11885e-05
MSTRG.58.3	239	255	248	579	377	380	106.86	116.74	108.68	220.8	216.39	231.63	110.76	222.94	1.0092	7.91191e-07	5.02027e-05
MSTRG.10897.19	532	401	341	1026	661	1039	237.85	183.58	149.44	391.25	379.39	633.32	190.29	467.987	1.2983	8.60105e-07	5.35825e-05
MSTRG.14632.28	578	659	526	1409	803	1014	258.42	301.69	230.51	537.31	460.9	618.08	263.54	538.763	1.0316	8.82753e-07	5.43464e-05
MSTRG.9903.15	393	401	226	1066	678	552	175.71	183.58	99.04	406.51	389.15	336.47	152.777	377.377	1.3046	9.00978e-07	5.44882e-05
MSTRG.9128.1	477	308	244	813	705	749	213.26	141	106.93	310.03	404.65	456.55	153.73	390.41	1.3446	9.0588e-07	5.44882e-05
MSTRG.16671.16	669	873	443	323	175	262	299.11	399.67	194.14	123.17	100.44	159.7	297.64	127.77	-1.22	1.17463e-06	6.98503e-05
MSTRG.3312.1	81	78	75	212	188	142	36.21	35.71	32.87	80.84	107.91	86.56	34.93	91.77	1.3936	1.19743e-06	7.04062e-05
MSTRG.421.1	317	244	229	136	106	103	141.73	111.7	100.35	51.86	60.84	62.78	117.927	58.4933	-1.0115	1.42026e-06	8.16727e-05
MSTRG.4184.23	102	115	118	316	178	232	45.6	52.65	51.71	120.5	102.17	141.42	49.9867	121.363	1.2797	1.49632e-06	8.51116e-05
MSTRG.6953.1	102	93	76	249	165	185	45.6	42.58	33.31	94.95	94.71	112.77	40.4967	100.81	1.3158	1.63841e-06	9.12105e-05
MSTRG.14791.2	43	25	30	118	91	88	19.23	11.45	13.15	45	52.23	53.64	14.61	50.29	1.7833	1.80375e-06	9.93582e-05
MSTRG.1361.1	196	211	183	483	293	330	87.63	96.6	80.2	184.19	168.17	201.15	88.1433	184.503	1.0657	2.06005e-06	0.000112294
XR_005575173.1	1801	2194	3395	1692	812	853	805.22	1004.43	1487.79	645.23	466.06	519.95	1099.15	543.747	-1.0154	2.32143e-06	0.00012396
MSTRG.4555.1	646	499	427	1152	778	1005	288.82	228.45	187.12	439.3	446.55	612.6	234.797	499.483	1.089	2.45379e-06	0.000129704
MSTRG.11979.1	3	10	14	62	46	55	1.34	4.58	6.14	23.64	26.4	33.53	4.02	27.8567	2.7928	2.73501e-06	0.000140317
MSTRG.13761.5	1232	1173	616	656	320	313	550.82	537.01	269.95	250.16	183.67	190.79	452.593	208.207	-1.1202	3.66618e-06	0.0001793
MSTRG.8606.16	147	203	163	69	66	55	65.72	92.93	71.43	26.31	37.88	33.53	76.6933	32.5733	-1.2354	4.30978e-06	0.000208825
MSTRG.13493.10	724	439	383	1193	858	1288	323.7	200.98	167.84	454.94	492.47	785.1	230.84	577.503	1.3229	4.68129e-06	0.000223865
MSTRG.11285.1	410	343	281	770	511	558	183.31	157.03	123.14	293.63	293.3	340.13	154.493	309.02	1.0002	4.8892e-06	0.000228439
XR_850986.3	119	136	175	56	56	34	53.2	62.26	76.69	21.36	32.14	20.72	64.05	24.74	-1.3724	5.09904e-06	0.000236135
MSTRG.812.1	72	84	66	223	128	160	32.19	38.46	28.92	85.04	73.47	97.53	33.19	85.3467	1.3626	5.17661e-06	0.000237624
MSTRG.12564.53	159	129	147	79	46	54	71.09	59.06	64.42	30.13	26.4	32.92	64.8567	29.8167	-1.1211	7.02374e-06	0.000308867
MSTRG.12074.5	175	195	210	503	331	260	78.24	89.27	92.03	191.81	189.98	158.48	86.5133	180.09	1.0577	8.65914e-06	0.000371342
MSTRG.6344.3	186	136	170	375	281	247	83.16	62.26	74.5	143	161.29	150.56	73.3067	151.617	1.0484	9.27908e-06	0.000391592
MSTRG.18428.60	122	115	129	272	208	219	54.55	52.65	56.53	103.72	119.39	133.49	54.5767	118.867	1.123	1.00149e-05	0.000419265
MSTRG.13687.7	945	737	650	1479	1269	2102	422.5	337.4	284.85	564	728.37	1281.27	348.25	857.88	1.3007	1.05484e-05	0.000438091
XR_005575460.1	113	110	118	288	168	233	50.52	50.36	51.71	109.83	96.43	142.02	50.8633	116.093	1.1906	1.12826e-05	0.000461265
MSTRG.12826.9	178	192	137	388	312	271	79.58	87.9	60.04	147.96	179.08	165.19	75.84	164.077	1.1133	1.23428e-05	0.000496845
MSTRG.9648.7	93	78	47	237	156	137	41.58	35.71	20.6	90.38	89.54	83.51	32.63	87.81	1.4282	1.35394e-05	0.000536757
XR_005575087.1	132	85	119	235	277	222	59.02	38.91	52.15	89.61	158.99	135.32	50.0267	127.973	1.3551	1.41964e-05	0.000558571
XR_005576158.1	412	325	327	211	80	164	184.2	148.79	143.3	80.46	45.92	99.97	158.763	75.45	-1.0733	1.54125e-05	0.000593382
MSTRG.10467.1	122	148	135	325	203	276	54.55	67.76	59.16	123.94	116.52	168.24	60.49	136.233	1.1713	1.69108e-05	0.000645944
MSTRG.2601.1	9	21	18	71	53	63	4.02	9.61	7.89	27.08	30.42	38.4	7.17333	31.9667	2.1559	1.89761e-05	0.000704268
XR_850979.3	283	404	135	139	53	75	126.53	184.95	59.16	53.01	30.42	45.72	123.547	43.05	-1.521	2.08532e-05	0.00076311
MSTRG.9215.1	113	111	80	257	162	228	50.52	50.82	35.06	98	92.98	138.98	45.4667	109.987	1.2744	2.39104e-05	0.000857009
XR_005574963.1	130	125	191	73	55	50	58.12	57.23	83.7	27.84	31.57	30.48	66.35	29.9633	-1.1469	2.49232e-05	0.000881235
MSTRG.14308.1	63	61	50	162	98	175	28.17	27.93	21.91	61.78	56.25	106.67	26.0033	74.9	1.5263	2.65703e-05	0.00093317
MSTRG.15943.1	112	95	106	275	149	183	50.07	43.49	46.45	104.87	85.52	111.55	46.67	100.647	1.1087	3.70845e-05	0.00126015
MSTRG.6346.1	45	26	27	112	66	99	20.12	11.9	11.83	42.71	37.88	60.35	14.6167	46.98	1.6844	3.82128e-05	0.00128184
MSTRG.9292.1	118	154	143	85	48	41	52.76	70.5	62.67	32.41	27.55	24.99	61.9767	28.3167	-1.1301	3.98572e-05	0.00132849
MSTRG.6942.2	561	502	268	1074	706	929	250.82	229.82	117.45	409.56	405.22	566.27	199.363	460.35	1.2073	4.01773e-05	0.00133068
MSTRG.18880.21	496	569	638	391	255	113	221.76	260.49	279.59	149.1	146.36	68.88	253.947	121.447	-1.0642	4.3424e-05	0.0014142
MSTRG.6347.1	48	30	33	107	77	105	21.46	13.73	14.46	40.8	44.2	64	16.55	49.6667	1.5854	4.98889e-05	0.00160165
MSTRG.1049.1	149	181	199	388	256	372	66.62	82.86	87.21	147.96	146.94	226.75	78.8967	173.883	1.1401	5.13437e-05	0.0016383
MSTRG.14841.2	158	152	101	332	225	235	70.64	69.59	44.26	126.6	129.14	143.24	61.4967	132.993	1.1128	5.37449e-05	0.00169426
MSTRG.3272.1	344	288	280	501	574	622	153.8	131.85	122.7	191.05	329.46	379.14	136.117	299.883	1.1396	5.56843e-05	0.00174489
MSTRG.1324.1	177	183	144	403	232	272	79.14	83.78	63.11	153.68	133.16	165.8	75.3433	150.88	1.0018	5.66369e-05	0.00174606
MSTRG.151.1	160	171	115	346	234	262	71.53	78.28	50.4	131.94	134.31	159.7	66.7367	141.983	1.0892	5.67227e-05	0.00174606
MSTRG.10986.1	47	36	54	145	78	107	21.01	16.48	23.66	55.29	44.77	65.22	20.3833	55.0933	1.4345	6.17033e-05	0.00186643
MSTRG.18950.28	326	266	247	531	407	555	145.75	121.78	108.24	202.49	233.61	338.3	125.257	258.133	1.0432	6.40115e-05	0.00192513
MSTRG.2099.1	52	69	58	162	101	140	23.25	31.59	25.42	61.78	57.97	85.34	26.7533	68.3633	1.3535	6.97128e-05	0.00207277
MSTRG.14782.10	203	196	119	412	252	475	90.76	89.73	52.15	157.11	144.64	289.54	77.5467	197.097	1.3458	7.55001e-05	0.00221962
MSTRG.11039.1	58	57	79	147	118	229	25.93	26.09	34.62	56.06	67.73	139.59	28.88	87.7933	1.604	7.618e-05	0.0022271
XR_005574961.1	233	192	130	427	276	398	104.17	87.9	56.97	162.83	158.42	242.6	83.0133	187.95	1.1789	7.83388e-05	0.00227748
MSTRG.1881.2	61	65	28	157	104	145	27.27	29.76	12.27	59.87	59.69	88.38	23.1	69.3133	1.5852	8.10485e-05	0.00234324
MSTRG.18465.1	31	22	29	65	90	81	13.86	10.07	12.71	24.79	51.66	49.37	12.2133	41.94	1.7799	8.54204e-05	0.00242312
MSTRG.169.1	330	293	253	592	386	614	147.54	134.14	110.87	225.75	221.55	374.26	130.85	273.853	1.0655	8.68492e-05	0.00242312
MSTRG.9999.10	190	184	190	56	96	53	84.95	84.24	83.26	21.36	55.1	32.31	84.15	36.2567	-1.2147	8.90726e-05	0.00246214
XR_005575694.1	84	87	51	167	163	165	37.56	39.83	22.35	63.68	93.56	100.58	33.2467	85.94	1.3701	8.93953e-05	0.00246214
XR_005574279.1	351	238	269	511	466	512	156.93	108.96	117.88	194.86	267.47	312.09	127.923	258.14	1.0129	9.10132e-05	0.00249357
MSTRG.4743.2	200	132	191	358	267	297	89.42	60.43	83.7	136.52	153.25	181.04	77.85	156.937	1.0114	0.000100889	0.00270744
MSTRG.4922.1	141	106	98	64	13	36	63.04	48.53	42.95	24.41	7.46	21.94	51.5067	17.9367	-1.5218	0.000105991	0.00281548
XR_005575828.1	35	60	53	112	127	130	15.65	27.47	23.23	42.71	72.89	79.24	22.1167	64.9467	1.5541	0.000111228	0.00292489
MSTRG.19379.1	24	29	11	93	39	112	10.73	13.28	4.82	35.46	22.38	68.27	9.61	42.0367	2.129	0.000113406	0.00296108
XR_005575924.1	141	82	88	246	183	181	63.04	37.54	38.56	93.81	105.04	110.33	46.38	103.06	1.1519	0.000115959	0.00297457
XR_005574968.1	76	65	70	148	126	183	33.98	29.76	30.68	56.44	72.32	111.55	31.4733	80.1033	1.3477	0.00011816	0.00301503
MSTRG.4746.4	68	77	71	165	134	130	30.4	35.25	31.11	62.92	76.91	79.24	32.2533	73.0233	1.1789	0.000119807	0.00302874
XR_850807.3	98	98	135	36	50	27	43.82	44.87	59.16	13.73	28.7	16.46	49.2833	19.63	-1.328	0.000120774	0.00303852
MSTRG.19696.1	263	192	187	162	51	72	117.59	87.9	81.95	61.78	29.27	43.89	95.8133	44.98	-1.0909	0.000124426	0.00311542
MSTRG.14113.15	3073	2888	4891	6380	5624	7815	1373.92	1322.15	2143.39	2432.95	3228.01	4763.62	1613.15	3474.86	1.1071	0.000126366	0.00314891
MSTRG.14405.2	100	86	43	188	139	251	44.71	39.37	18.84	71.69	79.78	153	34.3067	101.49	1.5648	0.000146781	0.00358929
XR_005575569.1	12	14	9	81	20	56	5.37	6.41	3.94	30.89	11.48	34.13	5.24	25.5	2.2829	0.000150635	0.00366638
MSTRG.20447.1	28	88	116	285	224	161	12.52	40.29	50.83	108.68	128.57	98.14	34.5467	111.797	1.6943	0.000157425	0.00379633
MSTRG.18864.2	0	0	1	69	3	7	0	0	0.44	26.31	1.72	4.27	0.146667	10.7667	6.1979	0.00016487	0.00395764
MSTRG.146.9	59	32	24	116	87	97	26.38	14.65	10.52	44.24	49.94	59.13	17.1833	51.1033	1.5724	0.000165859	0.0039632
XR_005575015.1	182	181	206	127	89	45	81.37	82.86	90.28	48.43	51.08	27.43	84.8367	42.3133	-1.0036	0.000185444	0.00437129
MSTRG.11779.1	19	29	27	113	56	50	8.49	13.28	11.83	43.09	32.14	30.48	11.2	35.2367	1.6536	0.000188497	0.00442334
MSTRG.24.1	140	65	132	34	28	46	62.59	29.76	57.85	12.97	16.07	28.04	50.0667	19.0267	-1.3958	0.000214725	0.00499403
MSTRG.16552.11	188	102	106	29	19	60	84.05	46.7	46.45	11.06	10.91	36.57	59.0667	19.5133	-1.5979	0.000219201	0.00507556
MSTRG.13367.1	65	67	73	135	133	156	29.06	30.67	31.99	51.48	76.34	95.09	30.5733	74.3033	1.2812	0.000225308	0.00517121
MSTRG.14175.7	173	167	164	58	52	88	77.35	76.45	71.87	22.12	29.85	53.64	75.2233	35.2033	-1.0955	0.000228344	0.005218
MSTRG.8317.1	36	47	26	117	60	115	16.1	21.52	11.39	44.62	34.44	70.1	16.3367	49.72	1.6057	0.000249783	0.00560993
MSTRG.8811.1	17	62	41	3	1	10	7.6	28.38	17.97	1.14	0.57	6.1	17.9833	2.60333	-2.7882	0.000269445	0.00600003
XR_005576473.1	78	103	157	68	33	28	34.87	47.15	68.8	25.93	18.94	17.07	50.2733	20.6467	-1.2839	0.000279775	0.00615153
MSTRG.1438.10	188	145	316	139	76	72	84.05	66.38	138.48	53.01	43.62	43.89	96.3033	46.84	-1.0398	0.000285541	0.00621832
XR_005575178.1	229	594	280	203	147	97	102.38	271.94	122.7	77.41	84.37	59.13	165.673	73.6367	-1.1698	0.000286378	0.00621832
MSTRG.147.1	101	71	71	173	131	174	45.16	32.5	31.11	65.97	75.19	106.06	36.2567	82.4067	1.1845	0.000307665	0.0065984
MSTRG.16635.17	212	114	165	376	218	323	94.78	52.19	72.31	143.38	125.13	196.88	73.0933	155.13	1.0857	0.000312132	0.00666093
MSTRG.5761.1	236	183	142	365	277	384	105.51	83.78	62.23	139.19	158.99	234.07	83.84	177.417	1.0814	0.000313126	0.00666093
MSTRG.14955.1	54	26	202	2737	1285	227	24.14	11.9	88.52	1043.73	737.55	138.37	41.52	639.883	3.9459	0.000355909	0.00736156
MSTRG.11399.1	0	0	0	22	16	1	0	0	0	8.39	9.18	0.61	0.001	6.06	12.5651	0.000380235	0.0076983
MSTRG.6505.1	197	146	288	128	96	48	88.08	66.84	126.21	48.81	55.1	29.26	93.71	44.39	-1.078	0.000385506	0.00772733
MSTRG.3247.1	122	77	59	49	18	24	54.55	35.25	25.86	18.69	10.33	14.63	38.5533	14.55	-1.4058	0.000385681	0.00772733
MSTRG.810.15	29	26	20	73	64	55	12.97	11.9	8.76	27.84	36.73	33.53	11.21	32.7	1.5445	0.000386883	0.00772733
MSTRG.12029.1	36	41	54	5	14	8	16.1	18.77	23.66	1.91	8.04	4.88	19.51	4.94333	-1.9807	0.000390126	0.00776248
MSTRG.18669.3	107	115	91	233	185	142	47.84	52.65	39.88	88.85	106.18	86.56	46.79	93.8633	1.0044	0.000484532	0.00939094
MSTRG.4936.17	117	122	195	351	239	204	52.31	55.85	85.46	133.85	137.18	124.35	64.54	131.793	1.03	0.000501489	0.00961278
MSTRG.18428.59	110	77	63	197	143	137	49.18	35.25	27.61	75.12	82.08	83.51	37.3467	80.2367	1.1033	0.00050523	0.00964916
MSTRG.12564.77	60	50	48	26	10	16	26.83	22.89	21.04	9.91	5.74	9.75	23.5867	8.46667	-1.4781	0.000579035	0.0108507
MSTRG.4556.1	75	100	96	228	120	169	33.53	45.78	42.07	86.95	68.88	103.01	40.46	86.28	1.0925	0.000583028	0.0108576
MSTRG.12620.1	84	104	117	258	126	207	37.56	47.61	51.27	98.39	72.32	126.18	45.48	98.9633	1.1217	0.000587795	0.0109076
MSTRG.8214.1	146	97	62	249	167	200	65.28	44.41	27.17	94.95	95.85	121.91	45.62	104.237	1.1921	0.00060055	0.0111049
MSTRG.18428.58	454	388	233	697	516	695	202.98	177.63	102.11	265.79	296.17	423.64	160.907	328.533	1.0298	0.000631943	0.011592
MSTRG.16491.1	130	147	145	103	58	29	58.12	67.3	63.54	39.28	33.29	17.68	62.9867	30.0833	-1.0661	0.000664767	0.0120471
MSTRG.1990.10	109	111	62	215	157	172	48.73	50.82	27.17	81.99	90.11	104.84	42.24	92.3133	1.1279	0.00066532	0.0120471
MSTRG.8840.48	56	44	60	141	170	66	25.04	20.14	26.29	53.77	97.57	40.23	23.8233	63.8567	1.4225	0.000673709	0.012157
MSTRG.5748.23	37	53	58	128	92	89	16.54	24.26	25.42	48.81	52.81	54.25	22.0733	51.9567	1.235	0.000742538	0.0132167
MSTRG.18058.1	208	167	154	312	246	360	93	76.45	67.49	118.98	141.2	219.44	78.98	159.873	1.0174	0.000777517	0.0137924
XR_005574195.1	222	137	212	335	270	441	99.25	62.72	92.9	127.75	154.97	268.81	84.9567	183.843	1.1137	0.000844094	0.0146263
MSTRG.3547.1	1	27	21	1	0	0	0.45	12.36	9.2	0.38	0	0	7.33667	0.126667	-5.856	0.000869218	0.0149607
MSTRG.1081.1	493	373	340	811	429	1009	220.42	170.76	149	309.27	246.23	615.03	180.06	390.177	1.1156	0.000883451	0.015059
MSTRG.15136.20	35	47	55	22	12	8	15.65	21.52	24.1	8.39	6.89	4.88	20.4233	6.72	-1.6037	0.000890941	0.0151106
MSTRG.7822.1	118	86	75	241	116	173	52.76	39.37	32.87	91.9	66.58	105.45	41.6667	87.9767	1.0782	0.000892258	0.0151106
MSTRG.9537.1	101	84	149	217	194	198	45.16	38.46	65.3	82.75	111.35	120.69	49.64	104.93	1.0799	0.000917473	0.0154377
MSTRG.5576.1	40	35	26	93	62	71	17.88	16.02	11.39	35.46	35.59	43.28	15.0967	38.11	1.3359	0.000926424	0.0155384
MSTRG.5763.1	79	34	35	136	88	114	35.32	15.57	15.34	51.86	50.51	69.49	22.0767	57.2867	1.3757	0.000930747	0.015561
XR_005574611.1	40	53	58	29	11	9	17.88	24.26	25.42	11.06	6.31	5.49	22.52	7.62	-1.5633	0.00101744	0.0167102
MSTRG.14636.7	174	110	102	363	194	163	77.79	50.36	44.7	138.43	111.35	99.36	57.6167	116.38	1.0143	0.00101775	0.0167102
MSTRG.18057.1	98	65	56	162	108	166	43.82	29.76	24.54	61.78	61.99	101.19	32.7067	74.9867	1.197	0.00102764	0.0168051
MSTRG.18215.1	221	221	116	99	96	51	98.81	101.18	50.83	37.75	55.1	31.09	83.6067	41.3133	-1.017	0.00108335	0.017661
XR_005574477.1	77	77	41	24	26	16	34.43	35.25	17.97	9.15	14.92	9.75	29.2167	11.2733	-1.3739	0.00112723	0.0182062
XR_005575440.1	51	0	19	1	1	0	22.8	0	8.33	0.38	0.57	0	10.3767	0.316667	-5.0342	0.00123197	0.0196238
MSTRG.5766.1	420	291	229	548	429	668	187.78	133.22	100.35	208.97	246.23	407.18	140.45	287.46	1.0333	0.00125292	0.0197485
MSTRG.9131.1	48	46	49	106	73	111	21.46	21.06	21.47	40.42	41.9	67.66	21.33	49.9933	1.2289	0.00135378	0.0212098
MSTRG.743.1	36	36	28	95	56	68	16.1	16.48	12.27	36.23	32.14	41.45	14.95	36.6067	1.292	0.00135549	0.0212098
MSTRG.13583.1	47	66	45	17	13	21	21.01	30.22	19.72	6.48	7.46	12.8	23.65	8.91333	-1.4078	0.00135778	0.0212098
MSTRG.2826.1	90	73	79	160	109	198	40.24	33.42	34.62	61.01	62.56	120.69	36.0933	81.42	1.1737	0.00136312	0.0212297
MSTRG.18950.29	148	110	97	239	155	227	66.17	50.36	42.51	91.14	88.97	138.37	53.0133	106.16	1.0018	0.0014685	0.0223947
XR_005574239.1	0	0	31	6226	1865	191	0	0	13.59	2374.22	1070.45	116.42	4.53	1187.03	8.0336	0.00147541	0.0223947
MSTRG.4141.1	63	61	33	109	110	110	28.17	27.93	14.46	41.57	63.14	67.05	23.52	57.2533	1.2835	0.00147643	0.0223947
XR_005575527.1	86	63	73	137	134	126	38.45	28.84	31.99	52.24	76.91	76.8	33.0933	68.65	1.0527	0.00160499	0.024134
XR_005574137.1	68	48	34	140	87	81	30.4	21.97	14.9	53.39	49.94	49.37	22.4233	50.9	1.1827	0.00185051	0.0269741
MSTRG.19562.1	88	76	101	63	16	4	39.34	34.79	44.26	24.02	9.18	2.44	39.4633	11.88	-1.732	0.00188633	0.027344
XR_005576292.1	1579	2074	4270	18645	5355	6165	705.96	949.49	1871.25	7110.09	3073.61	3757.87	1175.57	4647.19	1.983	0.00191703	0.0277121
MSTRG.38.11	57	44	85	27	24	18	25.48	20.14	37.25	10.3	13.78	10.97	27.6233	11.6833	-1.2414	0.0019343	0.0278849
MSTRG.2825.1	46	45	33	97	78	74	20.57	20.6	14.46	36.99	44.77	45.11	18.5433	42.29	1.1894	0.00195706	0.0281355
MSTRG.4484.1	50	35	24	79	130	58	22.35	16.02	10.52	30.13	74.62	35.35	16.2967	46.7	1.5188	0.00202664	0.0290559
XR_850663.3	75	41	37	16	15	18	33.53	18.77	16.21	6.1	8.61	10.97	22.8367	8.56	-1.4157	0.0021998	0.0309058
XR_005575214.1	12	3	10	36	23	34	5.37	1.37	4.38	13.73	13.2	20.72	3.70667	15.8833	2.0993	0.00220292	0.0309058
MSTRG.14175.3	60	99	89	29	39	29	26.83	45.32	39	11.06	22.38	17.68	37.05	17.04	-1.1205	0.00237284	0.0329366
MSTRG.14113.10	415	276	433	458	5368	1853	185.54	126.35	189.75	174.65	3081.07	1129.49	167.213	1461.74	3.1279	0.0025903	0.0350259
MSTRG.18419.1	75	88	43	38	24	21	33.53	40.29	18.84	14.49	13.78	12.8	30.8867	13.69	-1.1739	0.00280655	0.0371814
XR_003268360.2	68	131	80	69	25	25	30.4	59.97	35.06	26.31	14.35	15.24	41.81	18.6333	-1.166	0.00283512	0.0374652
MSTRG.8695.3	235	110	150	524	274	168	105.07	50.36	65.73	199.82	157.27	102.4	73.72	153.163	1.0549	0.00288	0.0377556
MSTRG.20527.1	81	72	61	35	36	19	36.21	32.96	26.73	13.35	20.66	11.58	31.9667	15.1967	-1.0728	0.00288596	0.0377556
MSTRG.10138.7	238	207	98	412	259	313	106.41	94.77	42.95	157.11	148.66	190.79	81.3767	165.52	1.0243	0.00290825	0.0377639
MSTRG.11402.1	9	6	11	40	21	27	4.02	2.75	4.82	15.25	12.05	16.46	3.86333	14.5867	1.9167	0.00294948	0.0380383
MSTRG.15233.1	52	83	67	46	21	18	23.25	38	29.36	17.54	12.05	10.97	30.2033	13.52	-1.1596	0.00300644	0.0385605
XR_005576060.1	61	72	63	183	108	77	27.27	32.96	27.61	69.79	61.99	46.94	29.28	59.5733	1.0248	0.00332755	0.0414597
MSTRG.13755.14	92	82	94	52	48	19	41.13	37.54	41.19	19.83	27.55	11.58	39.9533	19.6533	-1.0235	0.00333669	0.0414748
MSTRG.9800.1	41	37	41	94	62	73	18.33	16.94	17.97	35.85	35.59	44.5	17.7467	38.6467	1.1228	0.00352621	0.0433135
MSTRG.8896.1	0	0	0	16	8	1	0	0	0	6.1	4.59	0.61	0.001	3.76667	11.8791	0.00366934	0.044655
MSTRG.12407.1	1	0	43	1914	575	125	0.45	0	18.84	729.88	330.03	76.19	6.43	378.7	5.8801	0.00368629	0.0447572
MSTRG.705.28	59	81	55	179	78	119	26.38	37.08	24.1	68.26	44.77	72.54	29.1867	61.8567	1.0836	0.00376092	0.0454524
MSTRG.12468.1	9	6	29	81	52	23	4.02	2.75	12.71	30.89	29.85	14.02	6.49333	24.92	1.9403	0.00392464	0.047213
MSTRG.13689.1	125	72	63	129	175	188	55.89	32.96	27.61	49.19	100.44	114.6	38.82	88.0767	1.182	0.00418091	0.0492764
MSTRG.14798.1	26	19	33	61	54	55	11.62	8.7	14.46	23.26	30.99	33.53	11.5933	29.26	1.3356	0.00424249	0.0496665
XR_005575309.1	275	175	242	354	707	251	122.95	80.12	106.05	134.99	405.8	153	103.04	231.263	1.1663	0.00426219	0.0497857
