# Supplementary material for: Transcriptomic Analysis of Metarhizium anisopliae-Induced Immune-Related Long Non-Coding RNAs in Polymorphic Worker Castes of Solenopsis invicta
Source: Int J Mol Sci. 2023 Sep 12;24(18):13983. doi: 10.3390/ijms241813983 (PMC10531276; doi:10.3390/ijms241813983)
Supplement: Supplementary file 1 [file ijms-24-13983-s001.zip › Table S4 List of Differentially expressed lncRNAs in Metarhizium anisopliae-infected Solenopsis invicta workers at M24hD vs. M24hX..xlsx]

## Sheet: M_24hD-vs-M_24hX.filter
Table S4: List of Differentially expressed lncRNAs in Metarhizium anisopliae-infected Solenopsis invicta workers at M24hD vs. M24hX.
id	M_24hD1	M_24hD2	M_24hD3	M_24hX1	M_24hX2	M_24hX3	M_24hD1_CPM	M_24hD2_CPM	M_24hD3_CPM	M_24hX1_CPM	M_24hX2_CPM	M_24hX3_CPM	M_24hD_mean	M_24hX_mean	log2(fc)	PValue	FDR
MSTRG.6394.3	1317	1602	1253	325	492	249	560.08	596.38	611.79	177.44	202.4	176.83	589.417	185.557	-1.6674	6.92274e-30	3.61436e-26
MSTRG.146.51	3348	3678	2727	5079	6694	4098	1423.81	1369.23	1331.49	2772.95	2753.76	2910.17	1374.84	2812.29	1.0325	2.51316e-16	6.56059e-13
MSTRG.6716.2	3585	3718	2484	5329	7008	4547	1524.6	1384.12	1212.84	2909.44	2882.93	3229.03	1373.85	3007.13	1.1302	6.01249e-16	8.22424e-13
XR_005576089.1	6287	8478	3887	1931	2369	1356	2673.69	3156.14	1897.87	1054.26	974.55	962.96	2575.9	997.257	-1.369	6.30089e-16	8.22424e-13
MSTRG.4719.1	1770	2715	2206	4861	5550	4616	752.73	1010.72	1077.1	2653.93	2283.14	3278.03	946.85	2738.37	1.5321	2.78382e-15	2.90687e-12
MSTRG.9903.15	431	471	316	774	1062	581	183.29	175.34	154.29	422.58	436.88	412.59	170.973	424.017	1.3103	1.59516e-14	1.26075e-11
XR_005575798.1	9760	10823	11859	3431	4956	2593	4150.66	4029.13	5790.28	1873.2	2038.79	1841.41	4656.69	1917.8	-1.2799	1.69034e-14	1.26075e-11
MSTRG.12130.1	222	269	210	482	643	383	94.41	100.14	102.53	263.15	264.52	271.99	99.0267	266.553	1.4285	1.98535e-14	1.29569e-11
MSTRG.18138.1	2293	2744	1579	3507	4977	2875	975.15	1021.52	770.96	1914.69	2047.42	2041.67	922.543	2001.26	1.1172	3.56818e-14	2.06994e-11
MSTRG.15002.6	3821	4587	2801	5806	7349	4646	1624.97	1707.62	1367.62	3169.86	3023.21	3299.33	1566.74	3164.13	1.014	2.61804e-13	1.36688e-10
XR_005574236.1	350	386	311	590	868	508	148.85	143.7	151.85	322.12	357.08	360.75	148.133	346.65	1.2266	8.71985e-13	4.13876e-10
XR_003269299.2	1087	1570	750	364	500	284	462.27	584.47	366.2	198.73	205.69	201.68	470.98	202.033	-1.2211	2.68456e-12	1.16801e-09
MSTRG.6379.3	868	1037	702	1278	1709	1211	369.14	386.05	342.76	697.74	703.04	859.99	365.983	753.59	1.042	3.26886e-12	1.21905e-09
XR_005574325.1	2192	2886	1669	3525	4809	2659	932.2	1074.38	814.91	1924.52	1978.31	1888.28	940.497	1930.37	1.0374	5.0904e-12	1.7718e-09
MSTRG.12134.1	203	193	159	436	503	303	86.33	71.85	77.63	238.04	206.92	215.17	78.6033	220.043	1.4851	1.16509e-11	3.80183e-09
MSTRG.6344.3	121	126	81	272	310	228	51.46	46.91	39.55	148.5	127.53	161.91	45.9733	145.98	1.6669	1.53801e-11	4.72351e-09
MSTRG.10978.9	491	644	493	1131	1270	725	208.81	239.74	240.71	617.48	522.45	514.86	229.753	551.597	1.2635	2.2128e-11	6.41835e-09
MSTRG.13037.1	787	811	513	1113	1485	1022	334.69	301.91	250.48	607.66	610.9	725.77	295.693	648.11	1.1321	2.84945e-11	7.82999e-09
MSTRG.13761.5	1028	1779	1548	326	641	400	437.18	662.28	755.83	177.98	263.69	284.06	618.43	241.91	-1.3541	2.28288e-10	5.41768e-08
XR_005574689.1	293	394	271	658	701	457	124.6	146.68	132.32	359.24	288.38	324.54	134.533	324.053	1.2683	2.42705e-10	5.50941e-08
MSTRG.11168.1	638	708	457	205	255	99	271.32	263.57	223.13	111.92	104.9	70.3	252.673	95.7067	-1.4006	3.19302e-10	6.94614e-08
XR_003268920.2	3521	5721	3125	1284	2456	1184	1497.38	2129.78	1525.81	701.02	1010.34	840.81	1717.66	850.723	-1.0137	3.9119e-10	8.16961e-08
MSTRG.14632.29	296	352	169	524	660	601	125.88	131.04	82.52	286.08	271.51	426.8	113.147	328.13	1.5361	4.36307e-10	8.76138e-08
MSTRG.6393.2	232	235	225	50	91	45	98.66	87.48	109.86	27.3	37.44	31.96	98.6667	32.2333	-1.614	5.13954e-10	9.6181e-08
MSTRG.1907.6	291	304	241	564	670	372	123.75	113.17	117.67	307.92	275.62	264.17	118.197	282.57	1.2574	5.15815e-10	9.6181e-08
MSTRG.18880.21	685	903	855	243	418	232	291.31	336.16	417.46	132.67	171.96	164.75	348.31	156.46	-1.1546	5.39432e-10	9.71164e-08
MSTRG.5430.6	1243	1279	1063	1632	2334	1736	528.61	476.14	519.02	891.01	960.15	1232.81	507.923	1027.99	1.0171	9.85279e-10	1.71471e-07
MSTRG.14937.16	689	840	475	964	1348	905	293.01	312.71	231.92	526.31	554.54	642.68	279.213	574.51	1.041	1.12553e-09	1.89561e-07
MSTRG.15831.1	377	413	328	569	843	468	160.33	153.75	160.15	310.65	346.79	332.35	158.077	329.93	1.0615	1.44359e-09	2.35531e-07
MSTRG.1166.1	1409	1525	943	2090	2876	1397	599.21	567.72	460.43	1141.06	1183.12	992.07	542.453	1105.42	1.027	6.51368e-09	1.00023e-06
MSTRG.8379.1	149	231	210	36	57	47	63.37	86	102.53	19.65	23.45	33.38	83.9667	25.4933	-1.7197	1.59742e-08	2.3167e-06
MSTRG.10897.19	368	473	236	617	747	491	156.5	176.09	115.23	336.86	307.3	348.68	149.273	330.947	1.1486	3.31191e-08	4.55039e-06
MSTRG.13365.4	309	365	176	529	688	376	131.41	135.88	85.93	288.81	283.03	267.01	117.74	279.617	1.2478	3.82393e-08	4.99119e-06
XR_003268928.2	176	244	150	284	437	338	74.85	90.83	73.24	155.05	179.77	240.03	79.64	191.617	1.2667	6.99902e-08	8.70045e-06
XR_005575418.1	543	630	357	938	1077	582	230.92	234.53	174.31	512.11	443.05	413.3	213.253	456.153	1.097	9.44145e-08	1.14637e-05
MSTRG.9882.14	255	338	174	433	654	311	108.44	125.83	84.96	236.4	269.04	220.86	106.41	242.1	1.186	1.19623e-07	1.41944e-05
MSTRG.19934.21	1426	1230	1159	473	646	192	606.44	457.9	565.89	258.24	265.75	136.35	543.41	220.113	-1.3038	1.55684e-07	1.80628e-05
MSTRG.3933.1	297	356	297	653	794	354	126.31	132.53	145.01	356.51	326.63	251.39	134.617	311.51	1.2104	1.68934e-07	1.8766e-05
MSTRG.14841.2	157	208	113	267	351	252	66.77	77.43	55.17	145.77	144.39	178.96	66.4567	156.373	1.2345	1.75065e-07	1.90419e-05
MSTRG.1361.1	212	263	129	287	530	368	90.16	97.91	62.99	156.69	218.03	261.33	83.6867	212.017	1.3411	1.8902e-07	1.97375e-05
MSTRG.12864.1	603	537	423	796	1340	577	256.44	199.91	206.53	434.59	551.25	409.75	220.96	465.197	1.0741	3.70905e-07	3.79705e-05
MSTRG.146.47	242	396	206	418	624	374	102.92	147.42	100.58	228.21	256.7	265.59	116.973	250.167	1.0967	4.8148e-07	4.74303e-05
MSTRG.5574.10	345	308	258	481	610	384	146.72	114.66	125.97	262.61	250.94	272.7	129.117	262.083	1.0214	6.82211e-07	6.20583e-05
MSTRG.14606.6	915	1297	1372	467	656	346	389.12	482.84	669.89	254.96	269.86	245.71	513.95	256.843	-1.0007	6.9634e-07	6.20583e-05
MSTRG.12139.1	90	102	93	348	221	167	38.27	37.97	45.41	190	90.91	118.59	40.55	133.167	1.7155	7.01291e-07	6.20583e-05
MSTRG.706.1	208	334	185	415	486	311	88.46	124.34	90.33	226.57	199.93	220.86	101.043	215.787	1.0946	1.35924e-06	0.000109178
MSTRG.146.16	194	227	167	356	431	225	82.5	84.51	81.54	194.36	177.3	159.78	82.85	177.147	1.0964	1.50282e-06	0.000118882
MSTRG.5772.1	937	1244	558	1553	1746	1065	398.48	463.11	272.45	847.88	718.26	756.3	378.013	774.147	1.0342	1.58845e-06	0.00012378
MSTRG.2983.2	48	38	60	165	177	91	20.41	14.15	29.3	90.08	72.81	64.62	21.2867	75.8367	1.8329	2.12678e-06	0.000158627
MSTRG.6942.2	482	526	275	876	882	487	204.98	195.82	134.27	478.26	362.83	345.84	178.357	395.643	1.1494	2.25529e-06	0.000165843
MSTRG.812.1	67	62	48	137	188	88	28.49	23.08	23.44	74.8	77.34	62.49	25.0033	71.5433	1.5167	2.47051e-06	0.000179146
MSTRG.20289.8	0	4	0	32	24	33	0	1.49	0	17.47	9.87	23.43	0.496667	16.9233	5.0906	3.71919e-06	0.000252181
MSTRG.152.5	282	265	165	390	462	316	119.93	98.65	80.56	212.93	190.06	224.41	99.7133	209.133	1.0686	4.09966e-06	0.000274414
MSTRG.12468.1	0	12	5	45	48	47	0	4.47	2.44	24.57	19.75	33.38	2.30333	25.9	3.4912	5.00509e-06	0.000326645
XR_850979.3	327	267	135	42	120	42	139.06	99.4	65.92	22.93	49.37	29.83	101.46	34.0433	-1.5755	5.44598e-06	0.000349122
MSTRG.19863.1	651	861	476	1360	1358	641	276.85	320.53	232.41	742.51	558.65	455.2	276.597	585.453	1.0818	8.52174e-06	0.000517349
MSTRG.146.12	138	144	90	253	317	142	58.69	53.61	43.94	138.13	130.41	100.84	52.08	123.127	1.2413	8.78334e-06	0.000527101
MSTRG.14153.7	267	337	159	376	616	293	113.55	125.46	77.63	205.28	253.41	208.07	105.547	222.253	1.0743	9.38403e-06	0.000550494
MSTRG.14124.1	27	8	10	67	75	57	11.48	2.98	4.88	36.58	30.85	40.48	6.44667	35.97	2.4802	1.02384e-05	0.000593943
MSTRG.1282.5	149	285	142	387	414	236	63.37	106.1	69.33	211.29	170.31	167.59	79.6	183.063	1.2015	1.25219e-05	0.000710616
XR_005574324.1	244	219	145	275	468	268	103.77	81.53	70.8	150.14	192.52	190.32	85.3667	177.66	1.0574	1.32969e-05	0.000738542
MSTRG.3903.1	5702	4546	1579	1060	1828	1191	2424.9	1692.36	770.96	578.72	752	845.78	1629.41	725.5	-1.1673	1.77216e-05	0.000973941
XR_005574861.1	159	174	124	226	371	173	67.62	64.78	60.54	123.39	152.62	122.86	64.3133	132.957	1.0478	1.90229e-05	0.00102443
MSTRG.12620.1	94	74	75	211	284	91	39.98	27.55	36.62	115.2	116.83	64.62	34.7167	98.8833	1.5101	2.21074e-05	0.00112061
XR_005576650.1	722	569	302	147	317	146	307.05	211.82	147.45	80.26	130.41	103.68	222.107	104.783	-1.0838	2.86278e-05	0.00141006
MSTRG.12621.1	156	172	129	296	403	151	66.34	64.03	62.99	161.61	165.79	107.23	64.4533	144.877	1.1685	2.92681e-05	0.00142812
MSTRG.6924.6	165	203	141	337	341	186	70.17	75.57	68.84	183.99	140.28	132.09	71.5267	152.12	1.0887	3.14569e-05	0.00150676
XR_005574477.1	92	107	61	20	35	14	39.13	39.83	29.78	10.92	14.4	9.94	36.2467	11.7533	-1.6248	3.30185e-05	0.00155306
MSTRG.13462.1	49	63	38	97	116	98	20.84	23.45	18.55	52.96	47.72	69.59	20.9467	56.7567	1.4381	4.3208e-05	0.00201419
MSTRG.11475.1	15	11	14	76	68	25	6.38	4.1	6.84	41.49	27.97	17.75	5.77333	29.07	2.3321	4.51573e-05	0.00208643
MSTRG.14782.10	171	230	96	254	361	212	72.72	85.62	46.87	138.67	148.51	150.55	68.4033	145.91	1.0929	5.66969e-05	0.00255185
XR_005575460.1	117	107	76	146	233	145	49.76	39.83	37.11	79.71	95.85	102.97	42.2333	92.8433	1.1364	5.94256e-05	0.0026518
MSTRG.151.1	139	201	104	251	263	202	59.11	74.83	50.78	137.04	108.19	143.45	61.5733	129.56	1.0732	6.85392e-05	0.00303257
MSTRG.6505.1	246	223	134	75	107	52	104.62	83.02	65.43	40.95	44.02	36.93	84.3567	40.6333	-1.0538	7.58954e-05	0.00327479
XR_851118.3	32	64	45	77	199	80	13.61	23.83	21.97	42.04	81.86	56.81	19.8033	60.2367	1.6049	8.39937e-05	0.00356529
XR_005574917.1	1017	1299	447	248	619	191	432.5	483.58	218.25	135.4	254.64	135.64	378.11	175.227	-1.1096	0.000105258	0.00436153
XR_005575752.1	318	462	254	692	593	353	135.24	171.99	124.02	377.81	243.95	250.68	143.75	290.813	1.0165	0.00012174	0.00497652
MSTRG.810.25	65	98	40	120	158	108	27.64	36.48	19.53	65.52	65	76.7	27.8833	69.0733	1.3087	0.000122006	0.00497652
MSTRG.8695.3	153	117	251	282	641	304	65.07	43.56	122.55	153.96	263.69	215.88	77.06	211.177	1.4544	0.000146302	0.00574316
MSTRG.13755.14	63	132	63	17	27	23	26.79	49.14	30.76	9.28	11.11	16.33	35.5633	12.24	-1.5388	0.000174058	0.00673154
XR_005576674.1	66	62	57	96	147	104	28.07	23.08	27.83	52.41	60.47	73.86	26.3267	62.2467	1.2415	0.00019737	0.00752168
MSTRG.9648.7	67	137	69	127	207	163	28.49	51	33.69	69.34	85.16	115.75	37.7267	90.0833	1.2557	0.000217883	0.00818392
MSTRG.10530.1	59	63	41	157	104	77	25.09	23.45	20.02	85.72	42.78	54.68	22.8533	61.06	1.4178	0.000407006	0.0135349
MSTRG.147.1	59	94	55	133	139	93	25.09	34.99	26.85	72.61	57.18	66.04	28.9767	65.2767	1.1717	0.000432968	0.0141283
MSTRG.19562.1	59	114	27	8	17	14	25.09	42.44	13.18	4.37	6.99	9.94	26.9033	7.1	-1.9219	0.000439759	0.0141941
MSTRG.10994.9	53	78	39	87	164	76	22.54	29.04	19.04	47.5	67.47	53.97	23.54	56.3133	1.2584	0.000444086	0.0142244
XR_850986.3	135	141	131	60	68	33	57.41	52.49	63.96	32.76	27.97	23.43	57.9533	28.0533	-1.0467	0.000448056	0.014264
MSTRG.802.6	22	36	30	132	70	43	9.36	13.4	14.65	72.07	28.8	30.54	12.47	43.8033	1.8126	0.000451055	0.0142725
MSTRG.9984.1	103	162	74	35	41	37	43.8	60.31	36.13	19.11	16.87	26.28	46.7467	20.7533	-1.1715	0.000456729	0.0143649
XR_005575796.1	23004	24747	31520	10042	10196	3478	9782.97	9212.67	15390	5482.56	4194.4	2469.88	11461.9	4048.95	-1.5012	0.000459723	0.0143725
MSTRG.2539.1	18	10	6	20	82	38	7.65	3.72	2.93	10.92	33.73	26.99	4.76667	23.88	2.3248	0.000511556	0.0157108
MSTRG.16728.1	7	25	8	0	0	0	2.98	9.31	3.91	0	0	0	5.4	0.001	-12.3987	0.000521548	0.015924
MSTRG.17330.1	227	285	264	506	378	329	96.54	106.1	128.9	276.26	155.5	233.64	110.513	221.8	1.005	0.000529593	0.0160756
MSTRG.18135.1	66	39	101	405	131	105	28.07	14.52	49.31	221.12	53.89	74.57	30.6333	116.527	1.9275	0.000560233	0.0168102
MSTRG.6760.1	35	38	43	60	104	90	14.88	14.15	21	32.76	42.78	63.91	16.6767	46.4833	1.4789	0.000569383	0.0169384
MSTRG.1990.10	96	98	77	146	182	106	40.83	36.48	37.6	79.71	74.87	75.28	38.3033	76.62	1.0003	0.000611563	0.0180394
MSTRG.18259.1	71	81	70	25	33	14	30.19	30.15	34.18	13.65	13.58	9.94	31.5067	12.39	-1.3465	0.00064021	0.0187783
XR_850807.3	100	130	52	26	44	21	42.53	48.4	25.39	14.2	18.1	14.91	38.7733	15.7367	-1.3009	0.000656878	0.0191595
MSTRG.6940.1	181	207	167	398	316	185	76.97	77.06	81.54	217.29	130	131.38	78.5233	159.557	1.0229	0.000720979	0.0206826
MSTRG.3845.1	23	56	25	6	4	5	9.78	20.85	12.21	3.28	1.65	3.55	14.28	2.82667	-2.3368	0.000725837	0.0207082
MSTRG.2620.1	82	87	49	155	127	101	34.87	32.39	23.92	84.62	52.24	71.72	30.3933	69.5267	1.1938	0.000779654	0.0217678
XR_005576728.1	58	108	46	109	177	91	24.67	40.21	22.46	59.51	72.81	64.62	29.1133	65.6467	1.173	0.000858285	0.0234613
MSTRG.16552.11	157	189	124	78	33	35	66.77	70.36	60.54	42.59	13.58	24.86	65.89	27.01	-1.2866	0.000918753	0.0248539
XR_005575733.1	57	54	102	132	224	109	24.24	20.1	49.8	72.07	92.15	77.41	31.38	80.5433	1.3599	0.000960223	0.0254975
MSTRG.17319.1	3	7	6	47	15	19	1.28	2.61	2.93	25.66	6.17	13.49	2.27333	15.1067	2.7323	0.00102572	0.0266432
MSTRG.1881.2	66	90	36	106	140	89	28.07	33.5	17.58	57.87	57.59	63.2	26.3833	59.5533	1.1746	0.00105085	0.0271608
XR_005575440.1	1	219	85	0	0	0	0.43	81.53	41.5	0	0	0	41.1533	0.001	-15.3287	0.00106241	0.0271953
MSTRG.18094.1	31	37	15	87	62	45	13.18	13.77	7.32	47.5	25.51	31.96	11.4233	34.99	1.615	0.00107575	0.0273976
MSTRG.7860.1	47	50	32	68	129	57	19.99	18.61	15.62	37.13	53.07	40.48	18.0733	43.56	1.2691	0.00108479	0.0274937
XR_005575051.1	2	1	1	51	1	9	0.85	0.37	0.49	27.84	0.41	6.39	0.57	11.5467	4.3404	0.001353	0.0336382
MSTRG.8041.8	21	45	26	115	57	50	8.93	16.75	12.69	62.79	23.45	35.51	12.79	40.5833	1.6659	0.00136158	0.0336911
XR_850623.3	18600	18139	19482	5831	10719	1877	7910.07	6752.68	9512.28	3183.51	4409.55	1332.94	8058.34	2975.33	-1.4374	0.00139381	0.0343258
MSTRG.732.1	34	39	46	56	129	70	14.46	14.52	22.46	30.57	53.07	49.71	17.1467	44.45	1.3743	0.00142401	0.0347418
XR_005575766.1	0	1	0	26	0	17	0	0.37	0	14.2	0	12.07	0.123333	8.75667	6.1497	0.0015046	0.0362004
MSTRG.16487.1	0	0	0	1	11	15	0	0	0	0.55	4.53	10.65	0.001	5.24333	12.3563	0.00161724	0.0378637
MSTRG.12391.1	82	75	71	173	123	103	34.87	27.92	34.67	94.45	50.6	73.14	32.4867	72.73	1.1627	0.00166806	0.0387154
XR_003268360.2	81	98	117	25	61	23	34.45	36.48	57.13	13.65	25.09	16.33	42.6867	18.3567	-1.2175	0.00167688	0.0387154
MSTRG.6699.5	77	62	38	10	31	6	32.75	23.08	18.55	5.46	12.75	4.26	24.7933	7.49	-1.7269	0.00176872	0.039633
XR_005575836.1	38	39	39	64	106	55	16.16	14.52	19.04	34.94	43.61	39.06	16.5733	39.2033	1.2421	0.00190347	0.0418487
XR_005576518.1	84	89	54	86	168	121	35.72	33.13	26.37	46.95	69.11	85.93	31.74	67.33	1.0849	0.00196831	0.0429981
XR_005575624.1	54	56	13	86	97	79	22.96	20.85	6.35	46.95	39.9	56.1	16.72	47.65	1.5109	0.00198149	0.0431058
MSTRG.6953.1	118	133	54	192	178	124	50.18	49.51	26.37	104.82	73.23	88.06	42.02	88.7033	1.0779	0.00200466	0.0432493
MSTRG.5748.23	59	76	37	125	127	60	25.09	28.29	18.07	68.25	52.24	42.61	23.8167	54.3667	1.1908	0.0020659	0.0440248
MSTRG.2785.9	109	105	27	145	184	124	46.35	39.09	13.18	79.16	75.69	88.06	32.8733	80.97	1.3005	0.002228	0.0469047
XR_005574137.1	21	42	44	64	99	64	8.93	15.64	21.48	34.94	40.73	45.45	15.35	40.3733	1.3952	0.00225757	0.0473363
XR_005574308.1	0	0	1	22	1	10	0	0	0.49	12.01	0.41	7.1	0.163333	6.50667	5.316	0.00241177	0.0495741
