# Supplementary material for: Transcriptomic Analysis of Metarhizium anisopliae-Induced Immune-Related Long Non-Coding RNAs in Polymorphic Worker Castes of Solenopsis invicta
Source: Int J Mol Sci. 2023 Sep 12;24(18):13983. doi: 10.3390/ijms241813983 (PMC10531276; doi:10.3390/ijms241813983)
Supplement: Supplementary file 1 [file ijms-24-13983-s001.zip › Table S5 List of Differentially expressed lncRNAs in Metarhizium anisopliae-infected Solenopsis invicta workers at M48hD vs. M48hX..xlsx]

## Sheet: M_48hD-vs-M_48hX.filter
Table S5: List of Differentially expressed lncRNAs in Metarhizium anisopliae-infected Solenopsis invicta workers at M48hD vs. M48hX.
id	M_48hD1	M_48hD2	M_48hD3	M_48hX1	M_48hX2	M_48hX3	M_48hD1_CPM	M_48hD2_CPM	M_48hD3_CPM	M_48hX1_CPM	M_48hX2_CPM	M_48hX3_CPM	M_48hD_mean	M_48hX_mean	log2(fc)	PValue	FDR
MSTRG.6675.16	11	2	3	690	325	96	3.9	0.8	1.92	283.3	155.43	76.11	2.20667	171.613	6.2811	3.61557e-23	1.89166e-19
MSTRG.386.3	1777	595	502	1	1	0	630.54	238.1	321.06	0.41	0.48	0	396.567	0.296667	-10.3845	7.23177e-22	1.89183e-18
MSTRG.5780.9	572	648	214	31	32	1	202.96	259.31	136.86	12.73	15.3	0.79	199.71	9.60667	-4.3777	1.09377e-17	1.90754e-14
XR_005576451.1	22476	33846	16630	3920	4363	3156	7975.22	13543.9	10635.8	1609.49	2086.55	2502.12	10718.3	2066.05	-2.3751	1.97486e-16	2.58312e-13
MSTRG.14955.1	4	2	7	1701	2084	184	1.42	0.8	4.48	698.4	996.65	145.88	2.23333	613.643	8.1021	1.02854e-15	1.07626e-12
XR_005576395.1	415	397	276	83	76	42	147.26	158.86	176.52	34.08	36.35	33.3	160.88	34.5767	-2.2181	2.12503e-13	1.85303e-10
MSTRG.13451.7	955	408	524	159	68	26	338.87	163.27	335.13	65.28	32.52	20.61	279.09	39.47	-2.8219	1.20698e-12	9.02129e-10
XR_005576089.1	9546	5295	7402	2728	2265	1371	3387.23	2118.86	4733.99	1120.07	1083.21	1086.95	3413.36	1096.74	-1.638	2.31919e-10	1.51675e-07
MSTRG.11168.1	951	1328	506	254	206	155	337.45	531.42	323.62	104.29	98.52	122.89	397.497	108.567	-1.8724	5.11619e-10	2.89606e-07
XR_005576437.1	2234	2504	717	382	271	310	792.7	1002.01	458.56	156.84	129.6	245.77	751.09	177.403	-2.082	5.53529e-10	2.89606e-07
XR_850979.3	639	583	153	85	101	43	226.74	233.3	97.85	34.9	48.3	34.09	185.963	39.0967	-2.2499	2.39509e-09	1.13919e-06
XR_851002.3	2021	1715	255	198	185	146	717.12	686.28	163.09	81.3	88.47	115.75	522.163	95.1733	-2.4559	3.76386e-09	1.54549e-06
MSTRG.12471.1	742	861	537	292	148	125	263.29	344.54	343.44	119.89	70.78	99.1	317.09	96.59	-1.7149	3.92001e-09	1.54549e-06
MSTRG.7139.1	521	576	473	166	174	82	184.87	230.49	302.51	68.16	83.21	65.01	239.29	72.1267	-1.7302	4.13548e-09	1.54549e-06
MSTRG.19038.2	232	206	72	24	29	17	82.32	82.43	46.05	9.85	13.87	13.48	70.2667	12.4	-2.5025	6.56532e-09	2.28998e-06
MSTRG.4719.1	2168	1254	2291	9125	8489	4328	769.28	501.8	1465.22	3746.58	4059.76	3431.3	912.1	3745.88	2.038	1.80243e-08	5.89393e-06
MSTRG.12460.67	836	687	228	210	106	92	296.64	274.91	145.82	86.22	50.69	72.94	239.123	69.95	-1.7734	1.32294e-07	3.95914e-05
XR_003268762.2	231	198	210	77	52	21	81.97	79.23	134.31	31.61	24.87	16.65	98.5033	24.3767	-2.0147	1.38905e-07	3.95914e-05
MSTRG.9348.4	610	485	144	115	74	66	216.45	194.08	92.1	47.22	35.39	52.33	167.543	44.98	-1.8972	1.43776e-07	3.95914e-05
MSTRG.18534.4	1080	970	235	226	168	111	383.22	388.16	150.3	92.79	80.34	88	307.227	87.0433	-1.8195	1.68215e-07	4.28134e-05
MSTRG.7140.1	431	434	241	123	135	68	152.93	173.67	154.13	50.5	64.56	53.91	160.243	56.3233	-1.5085	1.71843e-07	4.28134e-05
MSTRG.20160.1	0	0	68	0	0	0	0	0	43.49	0	0	0	14.4967	0.001	-13.8234	2.0173e-07	4.79751e-05
XR_003269299.2	1796	988	1115	555	554	311	637.28	395.36	713.1	227.87	264.94	246.57	581.913	246.46	-1.2395	2.92075e-07	6.64407e-05
MSTRG.7135.19	3831	5562	4112	1896	1684	1071	1359.36	2225.71	2629.85	778.47	805.35	849.1	2071.64	810.973	-1.353	3.77269e-07	8.11196e-05
MSTRG.5574.10	380	244	210	913	667	470	134.84	97.64	134.31	374.86	318.98	372.62	122.263	355.487	1.5398	3.87613e-07	8.11196e-05
MSTRG.12407.1	0	0	3	777	3933	115	0	0	1.92	319.02	1880.91	91.17	0.64	763.7	10.2207	4.31367e-07	8.68042e-05
XR_850932.3	79	103	32	9	5	5	28.03	41.22	20.47	3.7	2.39	3.96	29.9067	3.35	-3.1582	5.20285e-07	9.85145e-05
MSTRG.16986.5	53	32	128	10	3	1	18.81	12.81	81.86	4.11	1.43	0.79	37.8267	2.11	-4.1641	5.27218e-07	9.85145e-05
MSTRG.3585.1	11	7	13	86	113	46	3.9	2.8	8.31	35.31	54.04	36.47	5.00333	41.94	3.0674	7.40675e-07	0.000133628
XR_005576650.1	716	366	587	202	189	120	254.06	146.46	375.42	82.94	90.39	95.14	258.647	89.49	-1.5312	9.02494e-07	0.000157395
XR_850573.3	975	1223	347	248	206	187	345.96	489.4	221.93	101.82	98.52	148.26	352.43	116.2	-1.6007	9.632e-07	0.000162563
MSTRG.6716.2	4017	3028	1900	7490	6662	4067	1425.36	1211.69	1215.16	3075.28	3186.02	3224.38	1284.07	3161.89	1.3001	1.36027e-06	0.000220533
MSTRG.8606.16	396	455	112	67	73	57	140.51	182.07	71.63	27.51	34.91	45.19	131.403	35.87	-1.8732	1.39098e-06	0.000220533
MSTRG.12468.1	12	7	8	53	148	37	4.26	2.8	5.12	21.76	70.78	29.33	4.06	40.6233	3.3228	1.57942e-06	0.000243046
MSTRG.11270.9	1800	1218	1259	3934	3434	2196	638.7	487.4	805.2	1615.24	1642.27	1741.02	643.767	1666.18	1.3719	1.7457e-06	0.00025283
MSTRG.15002.6	3548	2687	2655	8629	6819	4545	1258.95	1075.24	1698.02	3542.93	3261.11	3603.34	1344.07	3469.13	1.368	1.78642e-06	0.00025283
MSTRG.20507.2	1153	1218	267	321	142	142	409.12	487.4	170.76	131.8	67.91	112.58	355.76	104.097	-1.773	1.78798e-06	0.00025283
XR_005576517.1	10445	7637	3071	3057	2723	1726	3706.23	3056.05	1964.08	1255.16	1302.24	1368.4	2908.79	1308.6	-1.1524	3.37951e-06	0.000465305
MSTRG.20299.32	9599	7632	2296	2842	2302	1101	3406.04	3054.04	1468.42	1166.88	1100.9	872.89	2642.83	1046.89	-1.336	5.11244e-06	0.00066142
MSTRG.11994.5	15	17	39	0	0	0	5.32	6.8	24.94	0	0	0	12.3533	0.001	-13.5926	5.1756e-06	0.00066142
XR_005574206.1	637	288	312	81	182	63	226.03	115.25	199.54	33.26	87.04	49.95	180.273	56.75	-1.6675	5.18315e-06	0.00066142
MSTRG.5249.1	101	108	54	14	22	9	35.84	43.22	34.54	5.75	10.52	7.14	37.8667	7.80333	-2.2788	5.84279e-06	0.000712975
MSTRG.5945.1	54	18	138	12	1	1	19.16	7.2	88.26	4.93	0.48	0.79	38.2067	2.06667	-4.2084	5.8597e-06	0.000712975
XR_005576014.1	1749	942	2458	771	491	317	620.6	376.95	1572.03	316.56	234.81	251.32	856.527	267.563	-1.6786	7.27161e-06	0.000864661
MSTRG.10467.2	69	44	43	228	137	140	24.48	17.61	27.5	93.61	65.52	110.99	23.1967	90.04	1.9566	8.23383e-06	0.000957319
XR_005576329.1	1358	1274	247	323	253	156	481.86	509.81	157.97	132.62	120.99	123.68	383.213	125.763	-1.6074	8.53673e-06	0.000967241
MSTRG.11994.133	64	17	182	4	9	8	22.71	6.8	116.4	1.64	4.3	6.34	48.6367	4.09333	-3.5707	8.6889e-06	0.000967241
XR_005575183.1	39	30	75	257	262	162	13.84	12	47.97	105.52	125.3	128.44	24.6033	119.753	2.2831	1.08206e-05	0.00117944
MSTRG.6505.1	356	220	166	103	73	63	126.32	88.04	106.17	42.29	34.91	49.95	106.843	42.3833	-1.3339	1.10709e-05	0.0011821
MSTRG.5281.15	1621	1215	1322	3770	3244	2194	575.18	486.2	845.49	1547.9	1551.4	1739.44	635.623	1612.91	1.3434	1.20418e-05	0.00126006
XR_005575752.1	452	314	281	872	840	513	160.38	125.65	179.72	358.03	401.72	406.71	155.25	388.82	1.3245	1.44276e-05	0.00148011
MSTRG.20289.8	2	1	2	34	21	40	0.71	0.4	1.28	13.96	10.04	31.71	0.796667	18.57	4.5429	1.48789e-05	0.00149705
MSTRG.18678.2	115	131	105	31	36	20	40.81	52.42	67.15	12.73	17.22	15.86	53.46	15.27	-1.8078	1.53802e-05	0.00151828
MSTRG.15831.1	294	217	313	906	788	560	104.32	86.84	200.18	371.99	376.85	443.98	130.447	397.607	1.6079	1.568e-05	0.00151922
MSTRG.10540.1	518	512	1123	206	260	145	183.8	204.88	718.22	84.58	124.34	114.96	368.967	107.96	-1.773	1.70213e-05	0.00156041
MSTRG.3610.1	82	28	19	1	0	3	29.1	11.2	12.15	0.41	0	2.38	17.4833	0.93	-4.2326	1.71521e-05	0.00156041
XR_005574689.1	373	293	232	872	688	398	132.35	117.25	148.38	358.03	329.03	315.54	132.66	334.2	1.333	1.72819e-05	0.00156041
MSTRG.4556.1	81	45	35	187	198	97	28.74	18.01	22.38	76.78	94.69	76.9	23.0433	82.79	1.8451	1.72981e-05	0.00156041
MSTRG.20357.4	100	82	95	23	28	6	35.48	32.81	60.76	9.44	13.39	4.76	43.0167	9.19667	-2.2257	1.89134e-05	0.00166964
MSTRG.6091.9	39	31	4	156	110	78	13.84	12.41	2.56	64.05	52.61	61.84	9.60333	59.5	2.6313	1.91472e-05	0.00166964
MSTRG.152.5	249	174	167	610	425	334	88.35	69.63	106.81	250.46	203.25	264.8	88.2633	239.503	1.4402	2.08325e-05	0.00177192
MSTRG.12470.1	204	322	169	104	70	42	72.39	128.85	108.08	42.7	33.48	33.3	103.107	36.4933	-1.4984	2.09975e-05	0.00177192
MSTRG.15016.68	70	15	206	12	8	10	24.84	6	131.75	4.93	3.83	7.93	54.1967	5.56333	-3.2842	2.45356e-05	0.00203762
MSTRG.13365.4	371	352	161	890	772	382	131.64	140.86	102.97	365.42	369.2	302.86	125.157	345.827	1.4663	2.58554e-05	0.00209773
MSTRG.18263.8	735	453	415	1267	1143	778	260.8	181.27	265.42	520.21	546.63	616.81	235.83	561.217	1.2508	2.60612e-05	0.00209773
MSTRG.11995.57	109	32	299	12	33	14	38.68	12.81	191.23	4.93	15.78	11.1	80.9067	10.6033	-2.9317	2.85485e-05	0.00223047
MSTRG.18138.1	2162	1803	1772	5333	4004	2850	767.15	721.49	1133.29	2189.65	1914.87	2259.52	873.977	2121.35	1.2793	2.85629e-05	0.00223047
MSTRG.146.51	3209	3220	2312	7672	5960	4086	1138.66	1288.53	1478.65	3150	2850.3	3239.44	1301.95	3079.91	1.2422	2.94541e-05	0.00226624
MSTRG.6790.1	97	40	39	7	6	8	34.42	16.01	24.94	2.87	2.87	6.34	25.1233	4.02667	-2.6414	3.01461e-05	0.00228586
MSTRG.5748.22	635	465	615	1565	1610	984	225.32	186.08	393.33	642.56	769.96	780.13	268.243	730.883	1.4461	3.31975e-05	0.00248128
MSTRG.4043.40	35	8	111	7	3	1	12.42	3.2	70.99	2.87	1.43	0.79	28.87	1.69667	-4.0888	3.55921e-05	0.00262279
MSTRG.13275.44	130	46	340	34	26	26	46.13	18.41	217.45	13.96	12.43	20.61	93.9967	15.6667	-2.5849	3.70075e-05	0.00267221
MSTRG.10545.2	520	626	1286	194	332	163	184.51	250.5	822.47	79.65	158.78	129.23	419.16	122.553	-1.7741	3.72843e-05	0.00267221
MSTRG.15222.1	1267	963	188	295	205	137	449.57	385.36	120.24	121.12	98.04	108.62	318.39	109.26	-1.543	3.86005e-05	0.00272916
MSTRG.5949.42	98	24	302	13	24	17	34.77	9.6	193.15	5.34	11.48	13.48	79.1733	10.1	-2.9707	3.99113e-05	0.00278421
MSTRG.11285.1	165	165	220	612	548	421	58.55	66.03	140.7	251.28	262.07	333.77	88.4267	282.373	1.6751	4.39231e-05	0.00302376
MSTRG.12130.1	247	251	289	807	768	485	87.64	100.44	184.83	331.34	367.29	384.52	124.303	361.05	1.5383	4.54566e-05	0.00308869
MSTRG.18177.10	1779	1403	500	609	489	275	631.25	561.43	319.78	250.05	233.86	218.02	504.153	233.977	-1.1075	4.64079e-05	0.0031129
MSTRG.12307.28	44	20	186	3	8	11	15.61	8	118.96	1.23	3.83	8.72	47.5233	4.59333	-3.371	4.90435e-05	0.00322804
MSTRG.1361.1	183	145	148	504	394	247	64.93	58.02	94.65	206.93	188.43	195.83	72.5333	197.063	1.4419	4.93584e-05	0.00322804
MSTRG.12308.81	108	20	296	21	22	16	38.32	8	189.31	8.62	10.52	12.69	78.5433	10.61	-2.8881	5.3679e-05	0.00342498
MSTRG.8695.3	93	88	175	386	1039	224	33	35.21	111.92	158.49	496.89	177.59	60.0433	277.657	2.2092	5.54179e-05	0.00349333
XR_005576504.1	1495	1626	1210	3518	3991	1897	530.47	650.67	773.86	1444.44	1908.65	1503.97	651.667	1619.02	1.3129	5.82519e-05	0.00362208
MSTRG.20263.41	21	1	72	1	0	0	7.45	0.4	46.05	0.41	0	0	17.9667	0.136667	-7.0385	5.88449e-05	0.00362208
MSTRG.8784.1	587	541	176	100	152	113	208.29	216.49	112.56	41.06	72.69	89.59	179.113	67.78	-1.4019	5.97409e-05	0.00363272
MSTRG.18184.1	115	59	52	17	16	12	40.81	23.61	33.26	6.98	7.65	9.51	32.56	8.04667	-2.0166	6.09152e-05	0.00363272
MSTRG.12310.2	4724	6955	1307	1742	1623	696	1676.23	2783.13	835.9	715.24	776.18	551.8	1765.09	681.073	-1.3739	6.11009e-05	0.00363272
MSTRG.20376.2	3516	1085	631	748	164	311	1247.59	434.18	403.56	307.12	78.43	246.57	695.11	210.707	-1.722	6.40012e-05	0.00374024
MSTRG.15163.9	81	20	226	19	13	13	28.74	8	144.54	7.8	6.22	10.31	60.4267	8.11	-2.8974	6.43391e-05	0.00374024
MSTRG.19704.1	148	78	111	380	293	196	52.52	31.21	70.99	156.02	140.12	155.39	51.5733	150.51	1.5452	7.38425e-05	0.00424554
XR_005574250.1	5260	9462	5166	3488	3276	1546	1866.42	3786.34	3303.95	1432.12	1566.71	1225.69	2985.57	1408.17	-1.0842	7.51407e-05	0.00427322
MSTRG.14976.1	44	79	19	7	6	3	15.61	31.61	12.15	2.87	2.87	2.38	19.79	2.70667	-2.8702	8.48186e-05	0.00472097
MSTRG.6942.2	681	421	380	1155	1019	638	241.64	168.47	243.03	474.22	487.32	505.82	217.713	489.12	1.1678	9.06424e-05	0.00499201
MSTRG.4043.22	63	13	198	10	9	12	22.35	5.2	126.63	4.11	4.3	9.51	51.3933	5.97333	-3.105	9.30259e-05	0.00504716
MSTRG.10978.9	930	698	186	1995	2003	711	329.99	279.31	118.96	819.12	957.91	563.69	242.753	780.24	1.6844	9.35732e-05	0.00504716
MSTRG.6811.1	199	99	78	51	31	23	70.61	39.62	49.89	20.94	14.83	18.23	53.3733	18	-1.5681	9.6563e-05	0.00515528
MSTRG.12313.1	126	322	53	60	17	20	44.71	128.85	33.9	24.64	8.13	15.86	69.1533	16.21	-2.0929	0.000100296	0.00530051
MSTRG.10719.20	259	294	281	964	758	387	91.9	117.65	179.72	395.8	362.5	306.82	129.757	355.04	1.4522	0.000107792	0.00560398
MSTRG.20302.1	38524	51975	17621	20613	12715	10020	13669.6	20798.5	11269.6	8463.38	6080.8	7944	15245.9	7496.06	-1.0242	0.000108697	0.00560398
XR_851239.3	691	685	211	276	174	110	245.19	274.11	134.95	113.32	83.21	87.21	218.083	94.58	-1.2053	0.000109252	0.00560398
MSTRG.11994.88	100	29	349	23	30	23	35.48	11.6	223.21	9.44	14.35	18.23	90.0967	14.0067	-2.6854	0.000115113	0.0058473
XR_005575252.1	144	60	64	317	208	146	51.1	24.01	40.93	130.16	99.47	115.75	38.68	115.127	1.5736	0.000117339	0.00590306
MSTRG.20394.20	445	206	63	92	22	33	157.9	82.43	40.29	37.77	10.52	26.16	93.54	24.8167	-1.9143	0.000126229	0.0062898
XR_005574236.1	302	259	242	720	561	434	107.16	103.64	154.77	295.62	268.29	344.08	121.857	302.663	1.3125	0.000128416	0.00633844
MSTRG.11995.58	126	39	381	23	30	35	44.71	15.61	243.67	9.44	14.35	27.75	101.33	17.18	-2.5603	0.000135474	0.00662429
MSTRG.19849.38	37	15	37	123	144	75	13.13	6	23.66	50.5	68.87	59.46	14.2633	59.61	2.0632	0.000152337	0.00737989
MSTRG.11994.108	42	8	134	4	8	6	14.9	3.2	85.7	1.64	3.83	4.76	34.6	3.41	-3.3429	0.000157269	0.00754892
MSTRG.6709.16	56	49	126	372	385	176	19.87	19.61	80.58	152.74	184.12	139.54	40.02	158.8	1.9884	0.000161219	0.0075991
MSTRG.11994.22	79	10	172	19	10	7	28.03	4	110	7.8	4.78	5.55	47.3433	6.04333	-2.9697	0.0001708	0.0079107
MSTRG.20396.7	20	6	55	1	2	0	7.1	2.4	35.18	0.41	0.96	0	14.8933	0.456667	-5.0274	0.000170854	0.0079107
XR_005574325.1	2815	2490	1423	5007	4410	2598	998.85	996.41	910.09	2055.8	2109.03	2059.73	968.45	2074.85	1.0993	0.000184597	0.00847204
MSTRG.20264.61	19	6	39	1	0	0	6.74	2.4	24.94	0.41	0	0	11.36	0.136667	-6.3772	0.00018624	0.00847311
MSTRG.11995.101	36	1	69	0	3	0	12.77	0.4	44.13	0	1.43	0	19.1	0.476667	-5.3244	0.000191356	0.00856809
MSTRG.12308.13	81	10	194	5	17	11	28.74	4	124.07	2.05	8.13	8.72	52.27	6.3	-3.0526	0.000192879	0.00856809
MSTRG.4936.17	149	158	107	477	340	176	52.87	63.23	68.43	195.85	162.6	139.54	61.51	165.997	1.4323	0.00019324	0.00856809
MSTRG.10878.1	385	265	225	657	569	469	136.61	106.04	143.9	269.75	272.12	371.83	128.85	304.567	1.2411	0.000199933	0.00877535
MSTRG.20264.53	130	23	290	26	23	25	46.13	9.2	185.47	10.68	11	19.82	80.2667	13.8333	-2.5367	0.00020258	0.00877535
MSTRG.15232.1	43361	34085	10197	13932	12798	7200	15385.9	13639.6	6521.55	5720.26	6120.49	5708.26	11849	5849.67	-1.0183	0.000204389	0.00877535
MSTRG.12621.1	106	180	64	485	311	184	37.61	72.03	40.93	199.13	148.73	145.88	50.19	164.58	1.7133	0.000204624	0.00877535
MSTRG.5430.6	1316	942	967	2432	2142	1531	466.96	376.95	618.45	998.54	1024.39	1213.8	487.453	1078.91	1.1462	0.000212038	0.00901939
MSTRG.13770.3	5172	4785	1410	1937	1500	1009	1835.19	1914.78	901.77	795.3	717.36	799.95	1550.58	770.87	-1.0082	0.000215256	0.00908243
MSTRG.16823.1	121	171	92	48	52	20	42.93	68.43	58.84	19.71	24.87	15.86	56.7333	20.1467	-1.4937	0.000220237	0.00911275
MSTRG.12307.100	54	14	187	9	14	11	19.16	5.6	119.6	3.7	6.7	8.72	48.12	6.37333	-2.9165	0.000220911	0.00911275
MSTRG.19934.21	3039	1998	531	841	398	473	1078.34	799.53	339.6	345.3	190.34	375	739.157	303.547	-1.284	0.000222778	0.00911275
MSTRG.12460.18	250	214	89	74	47	50	88.71	85.63	56.92	30.38	22.48	39.64	77.0867	30.8333	-1.322	0.000222942	0.00911275
MSTRG.12466.1	225	225	132	113	65	41	79.84	90.04	84.42	46.4	31.09	32.51	84.7667	36.6667	-1.209	0.00022666	0.00919289
MSTRG.18135.1	67	46	30	107	349	69	23.77	18.41	19.19	43.93	166.91	54.7	20.4567	88.5133	2.1133	0.000237642	0.00951008
MSTRG.6675.54	16	5	14	96	46	42	5.68	2	8.95	39.42	22	33.3	5.54333	31.5733	2.5099	0.000238116	0.00951008
MSTRG.6272.2	3344	3500	834	1275	937	598	1186.56	1400.57	533.39	523.5	448.11	474.1	1040.17	481.903	-1.11	0.000241707	0.0095804
MSTRG.4555.1	680	419	276	1143	895	510	241.29	167.67	176.52	469.3	428.02	404.34	195.16	433.887	1.1527	0.000253131	0.00984222
MSTRG.20264.57	59	15	203	23	2	10	20.94	6	129.83	9.44	0.96	7.93	52.2567	6.11	-3.0964	0.000254851	0.00984222
MSTRG.458.137	39	8	109	2	9	4	13.84	3.2	69.71	0.82	4.3	3.17	28.9167	2.76333	-3.3874	0.000254917	0.00984222
MSTRG.4080.1	295	202	287	689	680	438	104.68	80.83	183.55	282.89	325.2	347.25	123.02	318.447	1.3722	0.000258424	0.00984222
MSTRG.14156.1	33	25	22	126	94	49	11.71	10	14.07	51.73	44.95	38.85	11.9267	45.1767	1.9214	0.0002596	0.00984222
MSTRG.732.1	52	21	25	112	136	60	18.45	8.4	15.99	45.99	65.04	47.57	14.28	52.8667	1.8884	0.00026743	0.0100661
MSTRG.20503.1	190	192	39	61	23	7	67.42	76.83	24.94	25.05	11	5.55	56.3967	13.8667	-2.024	0.000274196	0.0102471
MSTRG.11995.80	58	17	154	4	17	9	20.58	6.8	98.49	1.64	8.13	7.14	41.9567	5.63667	-2.896	0.000277153	0.0102841
MSTRG.11995.76	77	19	186	30	3	9	27.32	7.6	118.96	12.32	1.43	7.14	51.2933	6.96333	-2.8809	0.000301434	0.0111064
XR_005575173.1	476	465	429	1224	819	908	168.9	186.08	274.37	502.56	391.68	719.88	209.783	538.04	1.3588	0.000303995	0.0111224
MSTRG.15163.5	47	11	110	8	8	6	16.68	4.4	70.35	3.28	3.83	4.76	30.4767	3.95667	-2.9453	0.000310009	0.0112636
MSTRG.19004.1	325	427	137	135	128	59	115.32	170.87	87.62	55.43	61.21	46.78	124.603	54.4733	-1.1937	0.000331109	0.0119473
MSTRG.5962.54	87	18	226	5	23	17	30.87	7.2	144.54	2.05	11	13.48	60.87	8.84333	-2.7831	0.000347584	0.0123288
MSTRG.9984.1	246	229	57	79	52	20	87.29	91.64	36.45	32.44	24.87	15.86	71.7933	24.39	-1.5576	0.00034875	0.0123288
MSTRG.11994.71	48	12	122	2	6	10	17.03	4.8	78.03	0.82	2.87	7.93	33.2867	3.87333	-3.1033	0.000351386	0.0123386
XR_005575966.1	6676	5644	1533	2500	1444	1230	2368.86	2258.52	980.44	1026.46	690.58	975.16	1869.27	897.4	-1.0587	0.000362112	0.0125521
MSTRG.20263.35	36	9	86	6	3	5	12.77	3.6	55	2.46	1.43	3.96	23.79	2.61667	-3.1846	0.000367584	0.0125521
MSTRG.4043.28	46	1	156	11	4	4	16.32	0.4	99.77	4.52	1.91	3.17	38.83	3.2	-3.601	0.000368521	0.0125521
MSTRG.5692.1	4	4	12	50	48	41	1.42	1.6	7.67	20.53	22.96	32.51	3.56333	25.3333	2.8297	0.000373195	0.0125521
MSTRG.146.16	200	195	194	549	409	359	70.97	78.03	124.07	225.41	195.6	284.62	91.0233	235.21	1.3696	0.000374539	0.0125521
XR_005574228.1	6215	11552	8691	3460	5067	2536	2205.28	4622.68	5558.38	1420.62	2423.23	2010.58	4128.78	1951.48	-1.0811	0.000374653	0.0125521
XR_005576177.1	511	561	183	210	190	46	181.32	224.49	117.04	86.22	90.87	36.47	174.283	71.1867	-1.2918	0.000374679	0.0125521
MSTRG.14153.7	346	214	197	668	439	367	122.77	85.63	125.99	274.27	209.95	290.96	111.463	258.393	1.213	0.000376658	0.0125521
MSTRG.18390.24	320	212	287	635	708	453	113.55	84.83	183.55	260.72	338.59	359.14	127.31	319.483	1.3274	0.000382253	0.0126579
MSTRG.11737.7	1	62	1	0	0	0	0.35	24.81	0.64	0	0	0	8.6	0.001	-13.0701	0.000384916	0.0126659
XR_005576686.1	1496	1166	1813	835	530	525	530.83	466.59	1159.51	342.84	253.47	416.23	718.977	337.513	-1.091	0.000387975	0.0126868
MSTRG.20264.67	74	16	257	35	11	13	26.26	6.4	164.37	14.37	5.26	10.31	65.6767	9.98	-2.7183	0.000391197	0.0127127
XR_005575875.1	403	150	178	111	112	46	143	60.02	113.84	45.57	53.56	36.47	105.62	45.2	-1.2245	0.00039866	0.0128277
XR_005576545.1	484	374	261	831	670	520	171.74	149.66	166.92	341.2	320.42	412.26	162.773	357.96	1.1369	0.000399639	0.0128277
MSTRG.11994.20	63	14	187	11	15	14	22.35	5.6	119.6	4.52	7.17	11.1	49.1833	7.59667	-2.6947	0.000453739	0.0144754
MSTRG.11994.165	66	14	209	30	4	10	23.42	5.6	133.67	12.32	1.91	7.93	54.23	7.38667	-2.8761	0.000459184	0.0145239
MSTRG.13274.62	79	10	207	14	10	17	28.03	4	132.39	5.75	4.78	13.48	54.8067	8.00333	-2.7757	0.000460811	0.0145239
MSTRG.11995.77	45	12	139	10	7	10	15.97	4.8	88.9	4.11	3.35	7.93	36.5567	5.13	-2.8331	0.000470387	0.0146983
MSTRG.5801.1	27	0	75	1	1	2	9.58	0	47.97	0.41	0.48	1.59	19.1833	0.826667	-4.5364	0.000473423	0.0146983
MSTRG.17330.1	162	82	170	474	384	238	57.48	32.81	108.72	194.62	183.64	188.69	66.3367	188.983	1.5104	0.000474772	0.0146983
MSTRG.3620.1	6	7	50	1	1	0	2.13	2.8	31.98	0.41	0.48	0	12.3033	0.296667	-5.3741	0.000492109	0.0151087
MSTRG.5949.45	73	19	203	15	22	15	25.9	7.6	129.83	6.16	10.52	11.89	54.4433	9.52333	-2.5152	0.000493806	0.0151087
MSTRG.6924.4	117	121	188	598	327	301	41.52	48.42	120.24	245.53	156.38	238.64	70.06	213.517	1.6077	0.00052025	0.0158253
MSTRG.11994.119	74	10	191	6	20	12	26.26	4	122.16	2.46	9.56	9.51	50.8067	7.17667	-2.8236	0.000526304	0.0158766
MSTRG.2594.33	37	42	10	5	1	1	13.13	16.81	6.4	2.05	0.48	0.79	12.1133	1.10667	-3.4523	0.000528007	0.0158766
MSTRG.810.15	25	15	20	88	64	57	8.87	6	12.79	36.13	30.61	45.19	9.22	37.31	2.0167	0.000556671	0.0165483
MSTRG.17656.2	165	118	18	34	17	5	58.55	47.22	11.51	13.96	8.13	3.96	39.0933	8.68333	-2.1706	0.000560479	0.0165674
MSTRG.6682.1	3	0	6	12	79	23	1.06	0	3.84	4.93	37.78	18.23	1.63333	20.3133	3.6365	0.000577108	0.0169631
MSTRG.706.1	280	253	229	965	608	251	99.35	101.24	146.46	396.21	290.77	199	115.683	295.327	1.3521	0.000584927	0.0170623
MSTRG.5949.25	45	18	113	16	1	7	15.97	7.2	72.27	6.57	0.48	5.55	31.8133	4.2	-2.9212	0.000601366	0.0173831
XR_005575465.1	360	276	382	980	770	515	127.74	110.45	244.31	402.37	368.24	408.3	160.833	392.97	1.2889	0.00060661	0.0174384
MSTRG.812.1	119	63	64	251	189	116	42.23	25.21	40.93	103.06	90.39	91.97	36.1233	95.14	1.3971	0.000614031	0.0174852
MSTRG.20506.2	81	38	110	20	14	17	28.74	15.21	70.35	8.21	6.7	13.48	38.1	9.46333	-2.0094	0.000620424	0.0174852
MSTRG.20396.20	50	9	150	18	1	7	17.74	3.6	95.93	7.39	0.48	5.55	39.09	4.47333	-3.1274	0.000621608	0.0174852
MSTRG.14228.1	146	107	50	40	37	8	51.81	42.82	31.98	16.42	17.69	6.34	42.2033	13.4833	-1.6462	0.000666967	0.0184718
MSTRG.624.2	38	28	33	88	102	104	13.48	11.2	21.11	36.13	48.78	82.45	15.2633	55.7867	1.8699	0.000691916	0.0190532
MSTRG.12473.1	148	239	115	85	69	32	52.52	95.64	73.55	34.9	33	25.37	73.9033	31.09	-1.2492	0.000699205	0.0190631
MSTRG.14735.1	1698	1392	1235	3109	2729	1740	602.51	557.03	789.85	1276.51	1305.11	1379.5	649.797	1320.37	1.0229	0.000701528	0.0190631
MSTRG.11994.112	49	11	122	11	4	10	17.39	4.4	78.03	4.52	1.91	7.93	33.2733	4.78667	-2.7973	0.000704597	0.0190631
MSTRG.11994.67	56	14	177	28	3	8	19.87	5.6	113.2	11.5	1.43	6.34	46.2233	6.42333	-2.8472	0.000706849	0.0190631
MSTRG.3646.1	2	0	0	13	38	9	0.71	0	0	5.34	18.17	7.14	0.236667	10.2167	5.4319	0.000788266	0.0209351
MSTRG.2586.3	274	258	117	109	106	48	97.22	103.24	74.83	44.75	50.69	38.06	91.7633	44.5	-1.0441	0.000795822	0.0209827
MSTRG.2620.1	64	30	43	107	179	91	22.71	12	27.5	43.93	85.6	72.15	20.7367	67.2267	1.6968	0.000833736	0.0218105
MSTRG.6344.3	245	151	95	381	338	209	86.93	60.42	60.76	156.43	161.64	165.7	69.37	161.257	1.217	0.000856673	0.0220844
MSTRG.14632.29	222	318	223	855	577	323	78.77	127.25	142.62	351.05	275.94	256.08	116.213	294.357	1.3408	0.000856676	0.0220844
MSTRG.11270.6	105	55	64	227	150	137	37.26	22.01	40.93	93.2	71.74	108.62	33.4	91.1867	1.449	0.000858118	0.0220844
XR_005575398.1	399	251	385	734	851	660	141.58	100.44	246.23	301.37	406.98	523.26	162.75	410.537	1.3349	0.000861091	0.0220844
MSTRG.11994.100	15	0	46	0	0	1	5.32	0	29.42	0	0	0.79	11.58	0.263333	-5.4586	0.000899691	0.0229619
XR_005575418.1	871	651	378	1308	1234	685	309.06	260.51	241.75	537.04	590.15	543.08	270.44	556.757	1.0417	0.000907999	0.0230614
MSTRG.18116.4	1837	1274	670	2677	2160	1476	651.83	509.81	428.5	1099.13	1032.99	1170.19	530.047	1100.77	1.0543	0.000929008	0.0234685
MSTRG.1282.5	377	184	105	507	472	285	133.77	73.63	67.15	208.17	225.73	225.95	91.5167	219.95	1.2651	0.000935799	0.0234685
MSTRG.9203.4	515	534	178	185	226	78	182.74	213.69	113.84	75.96	108.08	61.84	170.09	81.96	-1.0533	0.000937484	0.0234685
XR_850838.3	233	249	82	93	81	23	82.68	99.64	52.44	38.18	38.74	18.23	78.2533	31.7167	-1.3029	0.00096987	0.0240548
MSTRG.5948.1	51	13	136	3	18	8	18.1	5.2	86.98	1.23	8.61	6.34	36.76	5.39333	-2.7689	0.000970099	0.0240548
MSTRG.14113.15	1089	879	1028	2761	2502	1041	386.41	351.74	657.46	1133.62	1196.55	825.32	465.203	1051.83	1.177	0.000984683	0.0243012
MSTRG.12308.91	49	17	138	24	5	8	17.39	6.8	88.26	9.85	2.39	6.34	37.4833	6.19333	-2.5975	0.00100588	0.0245924
XR_005574969.1	421	315	124	176	110	33	149.38	126.05	79.3	72.26	52.61	26.16	118.243	50.3433	-1.2319	0.00104358	0.0253955
MSTRG.12460.53	19	34	8	0	2	0	6.74	13.61	5.12	0	0.96	0	8.49	0.32	-4.7296	0.0010603	0.0256828
MSTRG.1580.1	294	212	285	746	521	412	104.32	84.83	182.27	306.3	249.16	326.64	123.807	294.033	1.2479	0.00107572	0.0259363
MSTRG.8461.1	41	29	42	112	130	79	14.55	11.6	26.86	45.99	62.17	62.63	17.67	56.93	1.6879	0.00109487	0.0262769
MSTRG.11946.9	2084	1624	1498	3735	2941	2248	739.47	649.86	958.05	1533.53	1406.5	1782.25	782.46	1574.09	1.0084	0.00110188	0.0263245
MSTRG.12308.17	86	22	191	39	11	15	30.52	8.8	122.16	16.01	5.26	11.89	53.8267	11.0533	-2.2838	0.00116878	0.0277958
MSTRG.20263.55	36	9	98	2	10	6	12.77	3.6	62.68	0.82	4.78	4.76	26.35	3.45333	-2.9317	0.00117566	0.0278329
MSTRG.8353.3	225	180	273	502	636	431	79.84	72.03	174.6	206.11	304.16	341.7	108.823	283.99	1.3839	0.00120601	0.0284226
MSTRG.20374.1	395	121	52	62	34	42	140.16	48.42	33.26	25.46	16.26	33.3	73.9467	25.0067	-1.5642	0.00123834	0.028924
XR_005575565.1	50	24	66	165	146	123	17.74	9.6	42.21	67.75	69.82	97.52	23.1833	78.3633	1.7571	0.00124496	0.0289494
MSTRG.2934.1	40	18	183	11	13	17	14.19	7.2	117.04	4.52	6.22	13.48	46.1433	8.07333	-2.5149	0.00127415	0.0294972
MSTRG.68.1	24	10	12	73	40	50	8.52	4	7.67	29.97	19.13	39.64	6.73	29.58	2.1359	0.00132828	0.0306148
MSTRG.11108.2	202	173	191	583	423	226	71.68	69.23	122.16	239.37	202.29	179.18	87.69	206.947	1.2388	0.00133722	0.0306858
MSTRG.5949.34	28	15	84	9	3	7	9.94	6	53.72	3.7	1.43	5.55	23.22	3.56	-2.7054	0.00136266	0.031133
XR_005574219.1	124	88	63	52	27	10	44	35.21	40.29	21.35	12.91	7.93	39.8333	14.0633	-1.502	0.00138629	0.0314346
MSTRG.8896.21	15	1	66	4	0	1	5.32	0.4	42.21	1.64	0	0.79	15.9767	0.81	-4.3019	0.00138788	0.0314346
MSTRG.9999.10	235	139	128	81	64	56	83.39	55.62	81.86	33.26	30.61	44.4	73.6233	36.09	-1.0286	0.00141381	0.0318838
XR_005576370.1	182	150	219	500	411	342	64.58	60.02	140.06	205.29	196.56	271.14	88.22	224.33	1.3464	0.00142143	0.031918
XR_005576032.1	237	302	68	95	31	51	84.1	120.85	43.49	39.01	14.83	40.43	82.8133	31.4233	-1.398	0.0014328	0.032036
MSTRG.147.1	56	40	52	130	164	89	19.87	16.01	33.26	53.38	78.43	70.56	23.0467	67.4567	1.5494	0.00144636	0.0320702
XR_005574580.1	454	177	326	828	651	508	161.09	70.83	208.5	339.96	311.33	402.75	146.807	351.347	1.259	0.00144659	0.0320702
XR_005574968.1	74	46	22	215	106	61	26.26	18.41	14.07	88.28	50.69	48.36	19.58	62.4433	1.6732	0.00149202	0.0329377
MSTRG.1088.10	803	384	303	1071	841	603	284.93	153.66	193.79	439.74	402.2	478.07	210.793	440.003	1.0617	0.00150088	0.0329892
MSTRG.3903.1	6329	2830	1591	1921	281	988	2245.74	1132.46	1017.53	788.73	134.38	783.3	1465.24	568.803	-1.3651	0.00150696	0.0329892
MSTRG.6961.3	40	26	104	13	15	9	14.19	10.4	66.51	5.34	7.17	7.14	30.3667	6.55	-2.2129	0.00155076	0.0337718
MSTRG.705.28	46	55	45	133	144	94	16.32	22.01	28.78	54.61	68.87	74.52	22.37	66	1.5609	0.00155562	0.0337718
MSTRG.11155.9	229	191	73	70	58	48	81.26	76.43	46.69	28.74	27.74	38.06	68.1267	31.5133	-1.1123	0.00159427	0.0344679
XR_005575951.1	55	46	34	15	11	6	19.52	18.41	21.74	6.16	5.26	4.76	19.89	5.39333	-1.8828	0.00161355	0.034741
MSTRG.19853.1	13	9	26	90	88	37	4.61	3.6	16.63	36.95	42.08	29.33	8.28	36.12	2.1251	0.00164602	0.035151
MSTRG.16671.16	123	100	30	277	152	149	43.64	40.02	19.19	113.73	72.69	118.13	34.2833	101.517	1.5661	0.00166666	0.0354469
MSTRG.11995.32	55	9	189	8	17	16	19.52	3.6	120.88	3.28	8.13	12.69	48	8.03333	-2.579	0.00175137	0.0369809
XR_005576031.1	1133	1127	328	511	194	271	402.03	450.98	209.77	209.81	92.78	214.85	354.26	172.48	-1.0384	0.00175292	0.0369809
MSTRG.5123.1	638	648	98	218	167	80	226.38	259.31	62.68	89.51	79.87	63.43	182.79	77.6033	-1.236	0.0017875	0.037559
MSTRG.11994.167	47	8	133	10	4	13	16.68	3.2	85.06	4.11	1.91	10.31	34.98	5.44333	-2.684	0.00180993	0.0378781
MSTRG.14153.52	1536	1381	264	397	508	242	545.02	552.63	168.84	163	242.95	191.86	422.163	199.27	-1.0831	0.00184582	0.0384754
MSTRG.4044.52	80	14	269	36	19	22	28.39	5.6	172.04	14.78	9.09	17.44	68.6767	13.77	-2.3183	0.00186788	0.0387177
MSTRG.12307.84	52	14	140	13	12	14	18.45	5.6	89.54	5.34	5.74	11.1	37.8633	7.39333	-2.3565	0.00188208	0.0387177
MSTRG.6960.8	26	18	84	3	10	7	9.23	7.2	53.72	1.23	4.78	5.55	23.3833	3.85333	-2.6013	0.00189317	0.0387177
XR_003268928.2	246	119	145	387	358	227	87.29	47.62	92.74	158.9	171.21	179.97	75.8833	170.027	1.1639	0.00190549	0.0387177
MSTRG.9081.2	481	451	524	1276	952	702	170.67	180.47	335.13	523.91	455.28	556.56	228.757	511.917	1.1621	0.00190602	0.0387177
MSTRG.20406.2	736	128	2501	154	67	83	261.16	51.22	1599.53	63.23	32.04	65.8	637.303	53.69	-3.5693	0.00190891	0.0387177
MSTRG.12308.102	62	11	144	8	10	17	22	4.4	92.1	3.28	4.78	13.48	39.5	7.18	-2.4598	0.00202729	0.0409529
XR_003269222.2	370	334	404	897	717	628	131.29	133.65	258.38	368.29	342.9	497.89	174.44	403.027	1.2081	0.0020402	0.0410552
XR_005574861.1	228	158	66	419	335	157	80.9	63.23	42.21	172.03	160.21	124.47	62.1133	152.237	1.2933	0.00212594	0.0426166
MSTRG.3940.112	25	8	73	9	1	4	8.87	3.2	46.69	3.7	0.48	3.17	19.5867	2.45	-2.999	0.00214608	0.042856
MSTRG.1370.1	1170	738	1178	2484	2131	1520	415.15	295.32	753.4	1019.89	1019.13	1205.08	487.957	1081.37	1.148	0.00219605	0.0436873
MSTRG.12134.1	269	243	233	616	516	298	95.45	97.24	149.02	252.92	246.77	236.26	113.903	245.317	1.1068	0.00221964	0.0439893
MSTRG.9882.14	369	345	219	752	502	393	130.93	138.06	140.06	308.76	240.08	311.58	136.35	286.807	1.0728	0.00223983	0.044111
MSTRG.9648.7	101	70	63	217	156	114	35.84	28.01	40.29	89.1	74.61	90.38	34.7133	84.6967	1.2868	0.00224264	0.044111
XR_005575814.1	143	37	71	25	29	16	50.74	14.81	45.41	10.26	13.87	12.69	36.9867	12.2733	-1.5915	0.00225517	0.0441911
MSTRG.3350.1	65	81	65	34	24	12	23.06	32.41	41.57	13.96	11.48	9.51	32.3467	11.65	-1.4733	0.00230176	0.0449359
MSTRG.3730.6	63	28	25	11	8	0	22.35	11.2	15.99	4.52	3.83	0	16.5133	2.78333	-2.5687	0.00237908	0.0461013
MSTRG.463.1	29	1	93	3	3	6	10.29	0.4	59.48	1.23	1.43	4.76	23.39	2.47333	-3.2414	0.00239839	0.0463039
MSTRG.6924.6	247	239	206	522	509	280	87.64	95.64	131.75	214.33	243.42	221.99	105.01	226.58	1.1095	0.00241023	0.0463614
MSTRG.18075.1	66	68	33	27	10	7	23.42	27.21	21.11	11.09	4.78	5.55	23.9133	7.14	-1.7438	0.00244147	0.0467905
MSTRG.16992.1	16	1	99	2	4	5	5.68	0.4	63.32	0.82	1.91	3.96	23.1333	2.23	-3.3749	0.00251658	0.0476801
XR_005575118.1	87	48	34	183	107	86	30.87	19.21	21.74	75.14	51.17	68.18	23.94	64.83	1.4372	0.00252244	0.0476801
MSTRG.19200.5	111	179	63	47	50	27	39.39	71.63	40.29	19.3	23.91	21.41	50.4367	21.54	-1.2275	0.00252365	0.0476801
MSTRG.13274.48	65	14	169	21	19	15	23.06	5.6	108.08	8.62	9.09	11.89	45.58	9.86667	-2.2078	0.00252435	0.0476801
MSTRG.5949.87	103	28	263	18	53	24	36.55	11.2	168.2	7.39	25.35	19.03	71.9833	17.2567	-2.0605	0.00254663	0.0479279
MSTRG.12826.9	187	144	118	351	257	221	66.35	57.62	75.47	144.12	122.91	175.21	66.48	147.413	1.1489	0.00260778	0.0489028
MSTRG.2609.1	16	3	5	26	57	27	5.68	1.2	3.2	10.68	27.26	21.41	3.36	19.7833	2.5578	0.00263293	0.0491981
MSTRG.10994.9	88	50	37	128	175	82	31.23	20.01	23.66	52.55	83.69	65.01	24.9667	67.0833	1.426	0.00264818	0.049307
