# Supplementary material for: Transcriptomic Analysis of Metarhizium anisopliae-Induced Immune-Related Long Non-Coding RNAs in Polymorphic Worker Castes of Solenopsis invicta
Source: Int J Mol Sci. 2023 Sep 12;24(18):13983. doi: 10.3390/ijms241813983 (PMC10531276; doi:10.3390/ijms241813983)
Supplement: Supplementary file 1 [file ijms-24-13983-s001.zip › Table S14 Prediction of lncRNAs as the precursor of miRNAs in Solenopsis invicta..xlsx]

## Sheet: Sheet 1
Table S14: Prediction of lncRNAs as the precursor of miRNAs in Solenopsis invicta
Query ID	Subject ID	Identity (%)	length	mismatch	gapopen	qstart	qend	sstart	send	evalue	bitscore
MSTRG.1558.2	dqu-mir-263b	96.117	103	4	0	3955	4057	8	110	2.41e-41	169
MSTRG.1558.2	ame-mir-263b	96.667	90	3	0	3953	4042	1	90	8.72e-36	150
MSTRG.1558.2	pca-mir-263b	89.091	110	10	2	3952	4061	5	112	2.44e-31	135
MSTRG.1558.2	nlo-mir-263b	89.535	86	6	1	3954	4036	1	86	1.91e-22	106
MSTRG.1558.2	ngi-mir-263b	89.535	86	6	1	3954	4036	1	86	1.91e-22	106
XR_005574236.1	dqu-mir-210	96.629	89	3	0	10652	10740	21	109	5.54e-35	148
XR_005574236.1	dqu-mir-6038	93	100	7	0	3192	3291	1	100	1.99e-34	147
XR_005574236.1	nvi-mir-210	94.048	84	5	0	10653	10736	1	84	7.22e-29	128
XR_005574236.1	ngi-mir-210	92.941	85	6	0	10653	10737	1	85	9.34e-28	124
XR_005574236.1	ame-mir-210	92.941	85	6	0	10653	10737	1	85	9.34e-28	124
XR_005574319.1	pca-mir-100	100	105	0	0	5450	5554	2	106	4.25e-49	195
XR_005574319.1	nvi-mir-100	100	96	0	0	5454	5549	5	100	4.28e-44	178
XR_005574319.1	dqu-let-7	98.947	95	1	0	6504	6598	1	95	7.16e-42	171
XR_005574319.1	dqu-mir-100	100	91	0	0	5456	5546	1	91	2.58e-41	169
XR_005574319.1	pca-let-7	97.895	95	2	0	6505	6599	1	95	3.33e-40	165
XR_005574524.1	dqu-mir-279b	97.826	92	2	0	2441	2532	14	105	6.25e-39	159
XR_005574524.1	pca-mir-279b	90.244	82	8	0	2445	2526	17	98	2.3e-23	108
XR_005574524.1	ame-mir-279d	89.041	73	8	0	2451	2523	4	76	2.31e-18	91.6
XR_005574852.1	ame-mir-87-1	92.233	103	4	3	23390	23491	1	100	4.77e-33	143
XR_005574852.1	dqu-mir-87	96.053	76	3	0	23230	23305	5	80	1.73e-27	124
MSTRG.7696.2	ame-mir-8	96.512	86	2	1	1512	1597	1	85	3.33e-33	141
MSTRG.7696.2	pca-mir-8	94.444	90	5	0	1512	1601	19	108	1.2e-32	139
MSTRG.7696.2	nlo-mir-8	93.023	86	6	0	1512	1597	1	86	9.32e-29	126
MSTRG.7696.2	nvi-mir-8	93.023	86	6	0	1512	1597	1	86	9.32e-29	126
MSTRG.7696.2	dqu-mir-8	93.59	78	5	0	1518	1595	1	78	5.61e-26	117
MSTRG.7696.3	ame-mir-8	96.512	86	2	1	1486	1571	1	85	3.25e-33	141
MSTRG.7696.3	pca-mir-8	94.444	90	5	0	1486	1575	19	108	1.17e-32	139
MSTRG.7696.3	nlo-mir-8	93.023	86	6	0	1486	1571	1	86	9.1e-29	126
MSTRG.7696.3	nvi-mir-8	93.023	86	6	0	1486	1571	1	86	9.1e-29	126
MSTRG.7696.3	dqu-mir-8	93.59	78	5	0	1492	1569	1	78	5.48e-26	117
MSTRG.7696.4	ame-mir-8	96.512	86	2	1	1148	1233	1	85	2.9e-33	141
MSTRG.7696.4	pca-mir-8	94.444	90	5	0	1148	1237	19	108	1.04e-32	139
MSTRG.7696.4	nlo-mir-8	93.023	86	6	0	1148	1233	1	86	8.11e-29	126
MSTRG.7696.4	nvi-mir-8	93.023	86	6	0	1148	1233	1	86	8.11e-29	126
MSTRG.7696.4	dqu-mir-8	93.59	78	5	0	1154	1231	1	78	4.88e-26	117
MSTRG.8464.7	dqu-bantam	92.683	82	4	1	20225	20306	2	81	2.48e-25	117
MSTRG.8464.7	pca-bantam	90.411	73	5	1	20233	20305	1	71	1.16e-18	95.3
MSTRG.8464.7	nvi-bantam	89.474	76	6	2	20230	20305	5	78	1.16e-18	95.3
MSTRG.8464.7	ame-bantam	89.474	76	6	2	20229	20304	4	77	1.16e-18	95.3
MSTRG.8464.7	tca-bantam	88.158	76	7	1	20230	20305	7	80	5.4e-17	89.8
XR_005575027.1	dqu-mir-282	96.262	107	3	1	6783	6889	1	106	5.26e-43	174
XR_005575027.1	ame-mir-282	91.111	90	7	1	6787	6875	3	92	6.95e-27	121
XR_005575027.1	pca-mir-282	94.667	75	3	1	6797	6870	2	76	3.23e-25	115
MSTRG.10055.1	dqu-mir-1a	97.403	77	2	0	4188	4264	1	77	2.52e-30	132
MSTRG.10055.1	dqu-mir-1b	98.63	73	1	0	4187	4259	74	2	9.05e-30	130
MSTRG.10055.1	pca-mir-1	95.89	73	3	0	4187	4259	1	73	1.96e-26	119
MSTRG.10055.1	ame-mir-1-2	93.59	78	3	1	4184	4259	1	78	2.54e-25	115
MSTRG.10055.1	ame-mir-1-1	93.59	78	3	1	4184	4259	1	78	2.54e-25	115
MSTRG.10055.2	dqu-mir-1a	97.403	77	2	0	4211	4287	1	77	2.4e-30	132
MSTRG.10055.2	dqu-mir-1b	98.63	73	1	0	4210	4282	74	2	8.62e-30	130
MSTRG.10055.2	pca-mir-1	95.89	73	3	0	4210	4282	1	73	1.87e-26	119
MSTRG.10055.2	ame-mir-1-2	93.59	78	3	1	4207	4282	1	78	2.41e-25	115
MSTRG.10055.2	ame-mir-1-1	93.59	78	3	1	4207	4282	1	78	2.41e-25	115
XR_003268631.2	ame-mir-10	98.969	97	1	0	3313	3409	1	97	2.93e-43	174
XR_003268631.2	nlo-mir-10	95.789	95	2	2	3313	3406	1	94	1.37e-36	152
XR_003268631.2	nvi-mir-10	95.789	95	2	2	3313	3406	1	94	1.37e-36	152
XR_003268631.2	dqu-mir-10	100	74	0	0	3325	3398	1	74	3.85e-32	137
XR_003268631.2	api-mir-10	96.386	83	3	0	3321	3403	1	83	3.85e-32	137
XR_005575409.1	ame-mir-10	98.969	97	1	0	1608	1704	1	97	1.73e-43	174
XR_005575409.1	nlo-mir-10	95.789	95	2	2	1608	1701	1	94	8.11e-37	152
XR_005575409.1	nvi-mir-10	95.789	95	2	2	1608	1701	1	94	8.11e-37	152
XR_005575409.1	dqu-mir-10	100	74	0	0	1620	1693	1	74	2.27e-32	137
XR_005575409.1	api-mir-10	96.386	83	3	0	1616	1698	1	83	2.27e-32	137
XR_005575485.1	pca-iab-4	98.824	85	1	0	3289	3373	1	85	1.23e-36	152
XR_005575485.1	ngi-mir-iab-4	98.824	85	1	0	3289	3373	1	85	1.23e-36	152
XR_005575485.1	ame-mir-iab-4	98.824	85	1	0	3289	3373	1	85	1.23e-36	152
XR_005575485.1	dqu-iab-4	100	75	0	0	3296	3370	1	75	9.54e-33	139
XR_005575485.1	tca-mir-iab-8	95.455	88	3	1	3285	3372	92	6	9.54e-33	139
XR_005575484.1	pca-iab-4	98.824	85	1	0	3353	3437	1	85	1.25e-36	152
XR_005575484.1	ngi-mir-iab-4	98.824	85	1	0	3353	3437	1	85	1.25e-36	152
XR_005575484.1	ame-mir-iab-4	98.824	85	1	0	3353	3437	1	85	1.25e-36	152
XR_005575484.1	dqu-iab-4	100	75	0	0	3360	3434	1	75	9.71e-33	139
XR_005575484.1	tca-mir-iab-8	95.455	88	3	1	3349	3436	92	6	9.71e-33	139
MSTRG.11157.1	dqu-mir-316	95.192	104	5	0	1445	1548	4	107	1.32e-40	165
MSTRG.11157.1	ame-mir-316	96.552	87	2	1	1446	1532	1	86	6.19e-34	143
MSTRG.11157.1	pca-mir-316	93.333	75	5	0	1454	1528	1	75	1.75e-24	111
MSTRG.13963.5	dqu-mir-281	92.308	104	8	0	320	423	3	106	6.71e-36	148
MSTRG.13963.5	ame-mir-281	94.937	79	4	0	326	404	10	88	1.13e-28	124
MSTRG.13963.5	pca-mir-281	97.183	71	2	0	333	403	16	86	1.46e-27	121
MSTRG.13963.9	dqu-mir-281	92.308	104	8	0	319	422	3	106	7.8e-36	148
MSTRG.13963.9	ame-mir-281	94.937	79	4	0	325	403	10	88	1.31e-28	124
MSTRG.13963.9	pca-mir-281	97.183	71	2	0	332	402	16	86	1.7e-27	121
MSTRG.13963.15	dqu-mir-281	92.308	104	8	0	314	417	3	106	8.3e-36	148
MSTRG.13963.15	ame-mir-281	94.937	79	4	0	320	398	10	88	1.4e-28	124
MSTRG.13963.15	pca-mir-281	97.183	71	2	0	327	397	16	86	1.81e-27	121
MSTRG.13963.16	dqu-mir-281	92.308	104	8	0	3307	3410	3	106	1.92e-35	148
MSTRG.13963.16	ame-mir-281	94.937	79	4	0	3313	3391	10	88	3.23e-28	124
MSTRG.13963.16	pca-mir-281	97.183	71	2	0	3320	3390	16	86	4.18e-27	121
XR_005575636.1	dqu-mir-281	92.308	104	8	0	1129	1232	106	3	6.26e-36	148
XR_005575636.1	ame-mir-281	94.937	79	4	0	1148	1226	88	10	1.05e-28	124
XR_005575636.1	pca-mir-281	97.183	71	2	0	1149	1219	86	16	1.36e-27	121
XR_003268928.2	pca-mir-124	100	97	0	0	4633	4729	12	108	1.08e-44	180
XR_003268928.2	dqu-mir-124	98.947	95	1	0	4635	4729	1	95	6.5e-42	171
XR_003268928.2	ame-mir-124	100	77	0	0	4642	4718	1	77	1.42e-33	143
XR_003268928.2	nvi-mir-124	97.403	77	2	0	4642	4718	1	77	3.07e-30	132
XR_003268928.2	bmo-mir-124	97.619	42	0	1	4680	4721	43	83	6.79e-12	71.3
MSTRG.18769.1	dqu-mir-279a	94.937	79	3	1	3183	3260	23	101	1.14e-27	122
MSTRG.18769.1	dqu-mir-996	85.859	99	11	3	3475	3571	8	105	1.49e-21	102
MSTRG.18769.1	ame-mir-996	84.27	89	8	4	3482	3569	5	88	1.94e-15	82.4
XR_005576621.1	dqu-mir-2788	95.699	93	4	0	3967	4059	14	106	6.47e-36	150
XR_005576621.1	dqu-mir-193	96.341	82	3	0	2340	2421	14	95	1.81e-31	135
XR_005576621.1	ame-mir-193	91.139	79	6	1	2342	2419	18	96	1.42e-22	106
XR_005576483.1	ame-mir-14	90.698	86	5	2	1808	1892	89	6	3.9e-24	111
XR_005576483.1	dqu-mir-14	91.566	83	2	3	1802	1881	81	1	1.4e-23	110
XR_005576483.1	pca-mir-14	92.308	78	3	1	1807	1884	75	1	5.04e-23	108
XR_005576483.1	nvi-mir-14	84.615	91	9	3	1801	1886	99	9	2.36e-16	86.1
XR_005576483.1	ngi-mir-14	84.524	84	8	3	1808	1886	84	1	3.95e-14	78.7
XR_003269033.2	dqu-mir-252a	95.098	102	5	0	973	1074	7	108	7.8e-40	161
XR_003269033.2	pca-mir-252	91.919	99	8	0	974	1072	2	100	3.65e-33	139
XR_003269033.2	nvi-mir-252	87.879	99	12	0	974	1072	3	101	1.71e-26	117
XR_003269033.2	nlo-mir-252	89.888	89	9	0	974	1062	3	91	6.16e-26	115
XR_003269033.2	ngi-mir-252	89.888	89	9	0	974	1062	3	91	6.16e-26	115
